# Supplementary material for: Synthesis of the proposed structure of phaeosphaeride A
Source: Royal Society of Chemistry journal article supplement (doi:10.1039/c1ob05612c), 2011-01-01

## Synthesis of the Proposed Structure of Phaeosphaeride A

**Kenichi Kobayashi,<sup>a</sup> Iwao Okamoto,<sup>b</sup> Nobuyoshi Morita,<sup>b</sup> Tamiko Kiyotani,<sup>b</sup>  
and Osamu Tamura\*<sup>b</sup>**

<sup>a</sup> *Discovery Research Laboratories, Kyorin Pharmaceutical Co., Ltd., 2399-1, Nogi, Nogi-Machi,  
Shimotsuga-Gun, Tochigi 329-0114, Japan*

<sup>b</sup> *Showa Pharmaceutical University, 3-3165 Higashi-tamagawagakuen, Machida, Tokyo 194-8543, Japan.*  
*Fax: +81 (42) 1579; E-mail: tamura@ac.shoyaku.ac.jp*

**<sup>1</sup>H and <sup>13</sup>C NMR spectra**

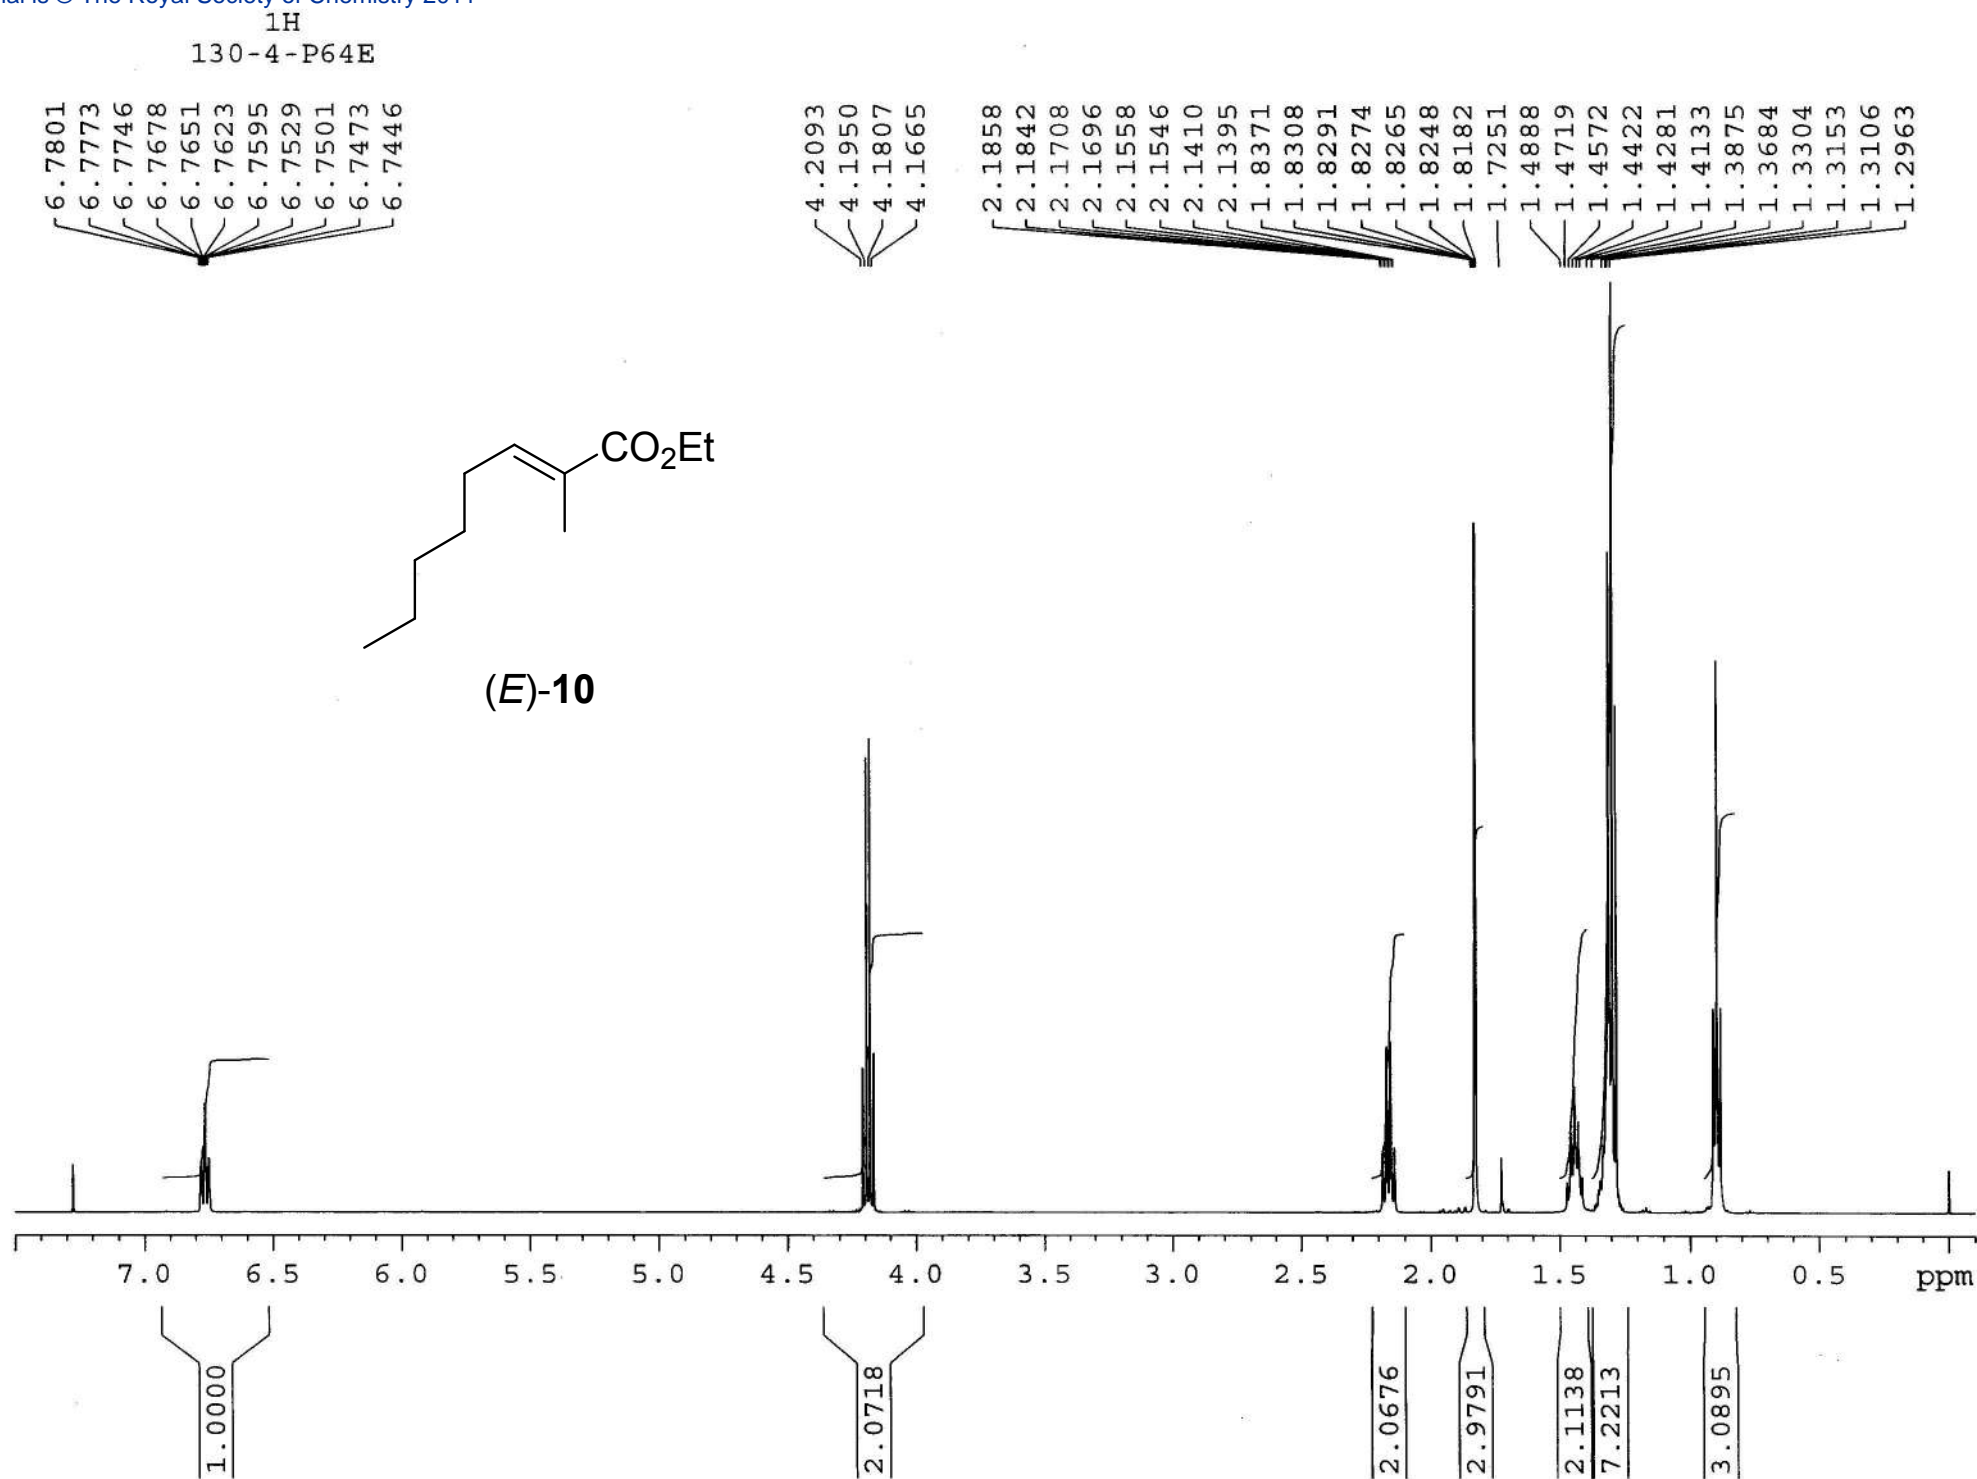

<sup>13</sup>C  
130-4-P64E

—168.3075

—142.4251

—127.6108

77.2570  
77.0000  
76.7484

—60.3221

31.5245  
28.6074  
28.2348  
—22.4612

14.2566  
13.9509  
12.2755

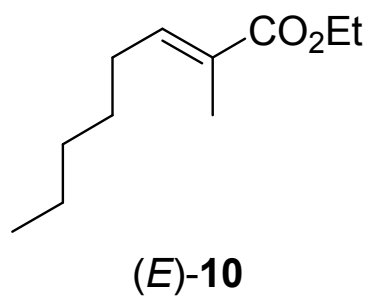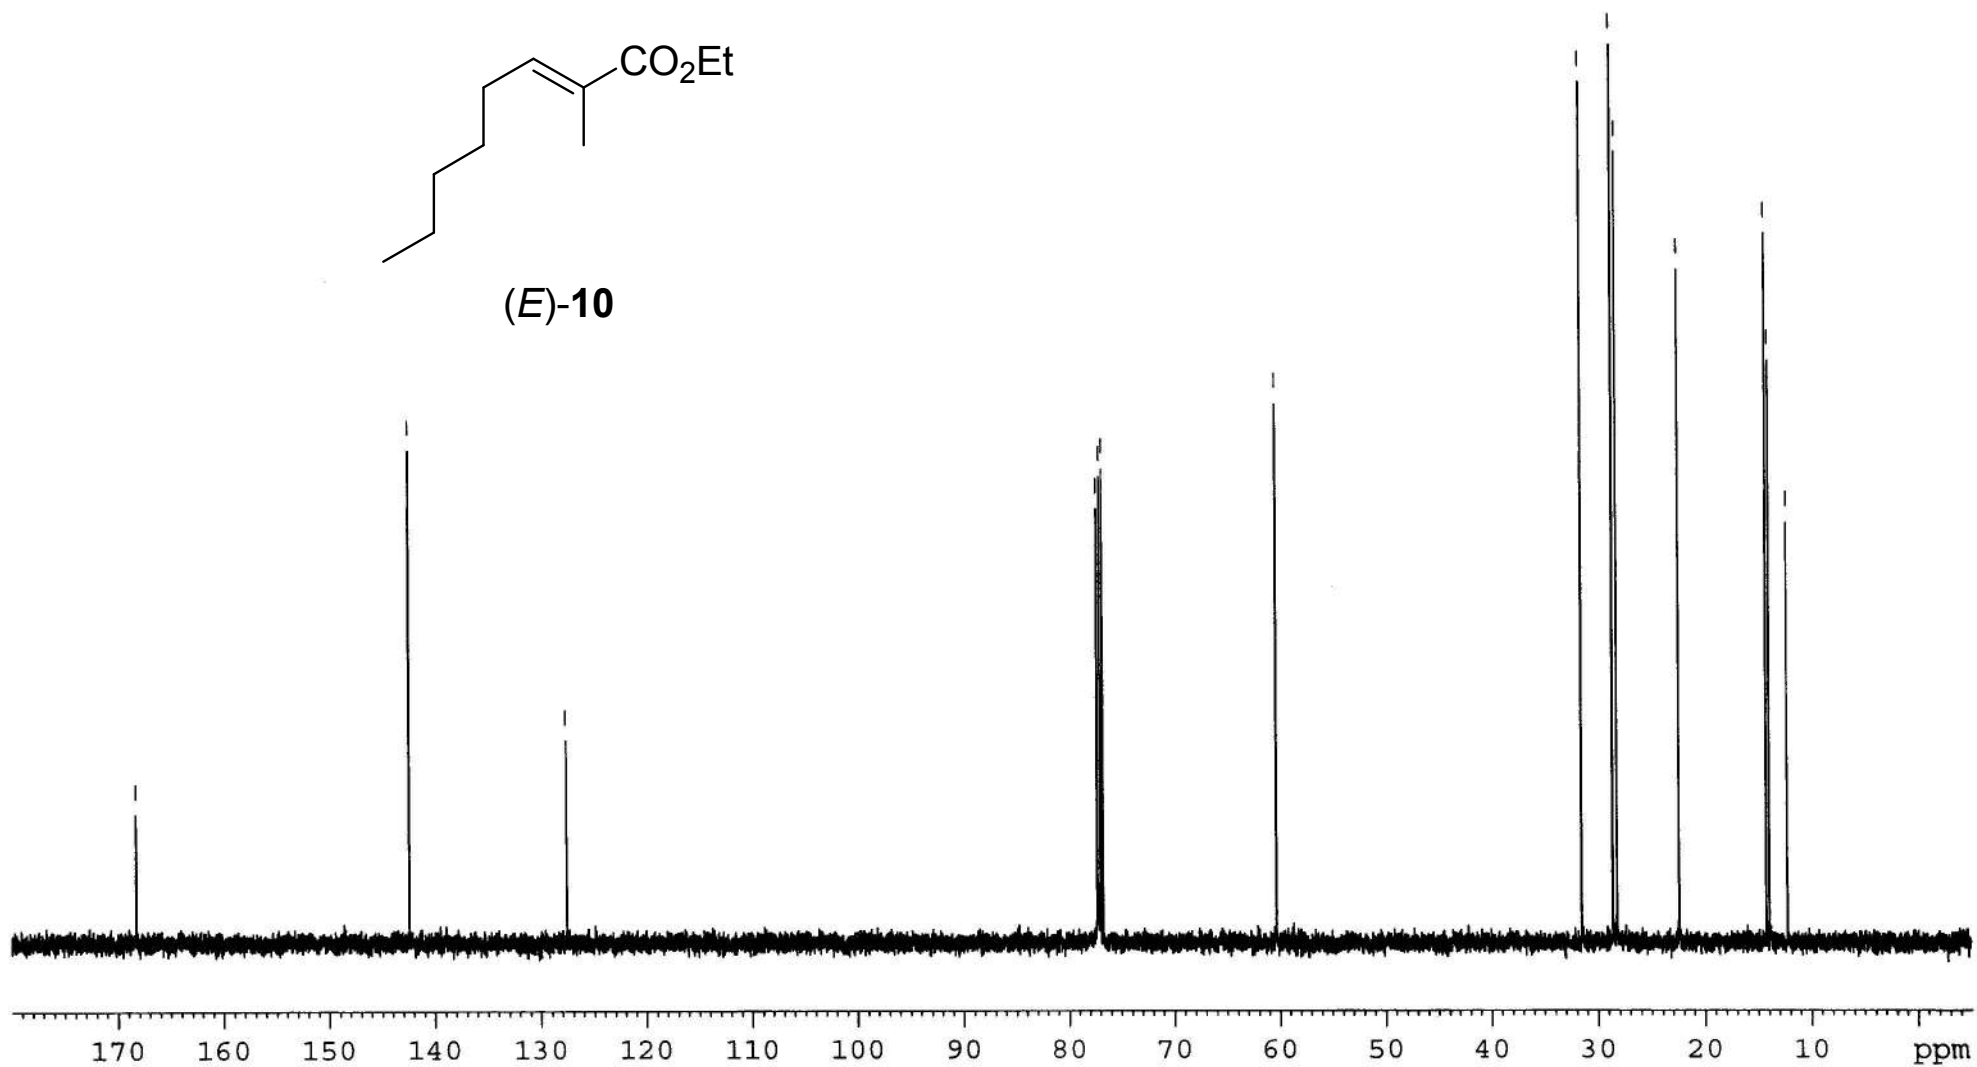

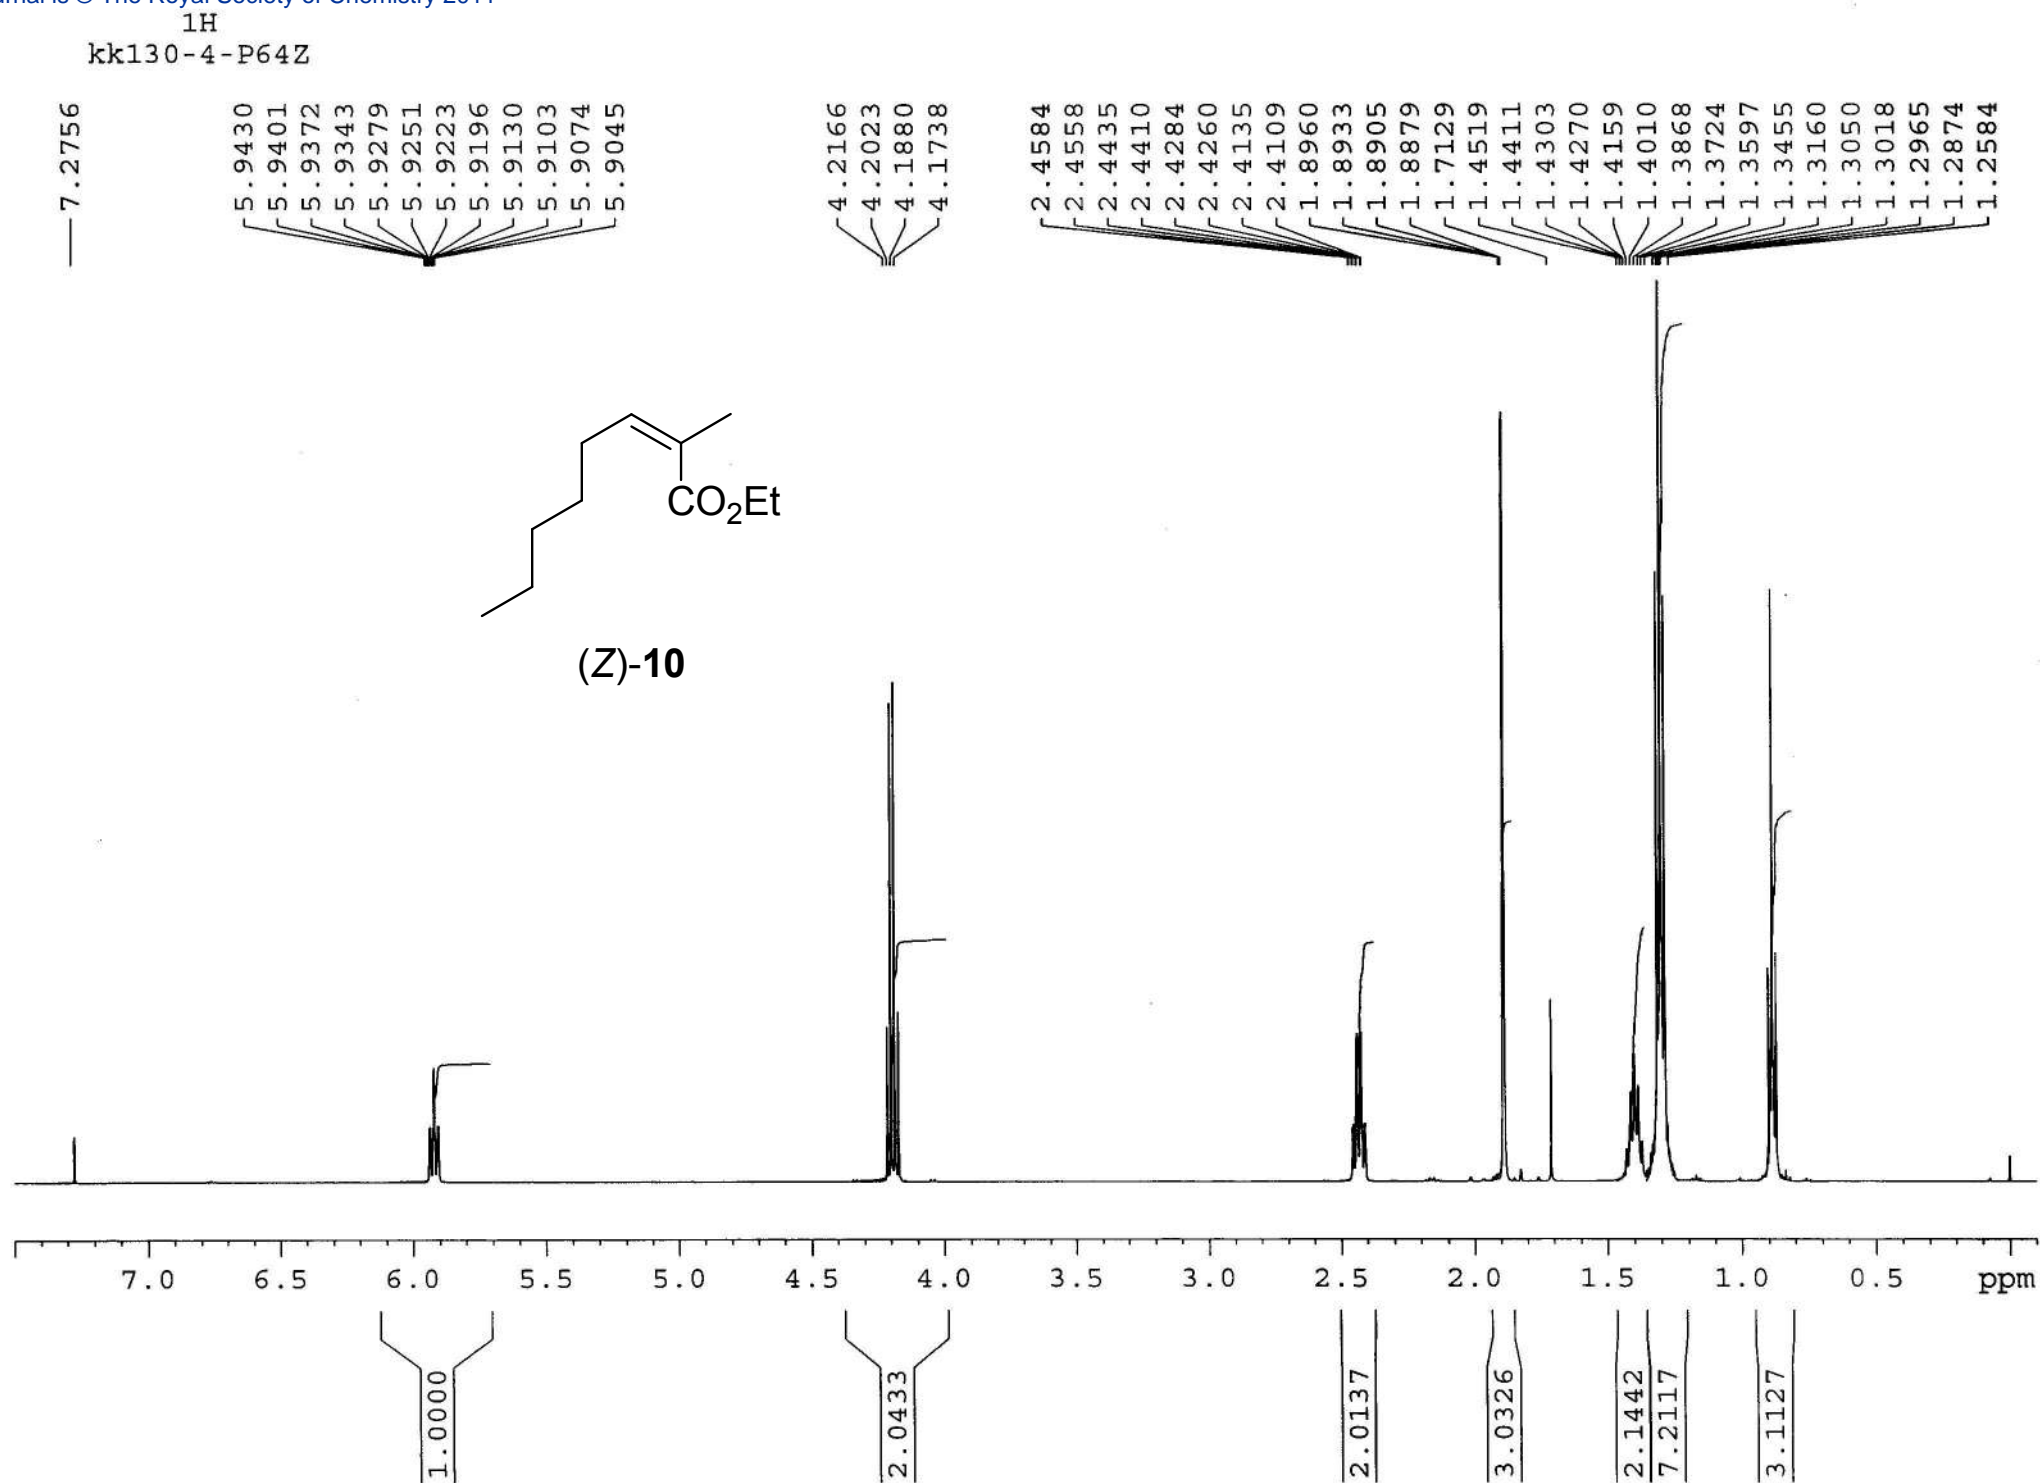

<sup>13</sup>C  
kk130-4-P64Z

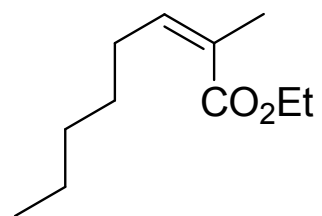

(Z)-10

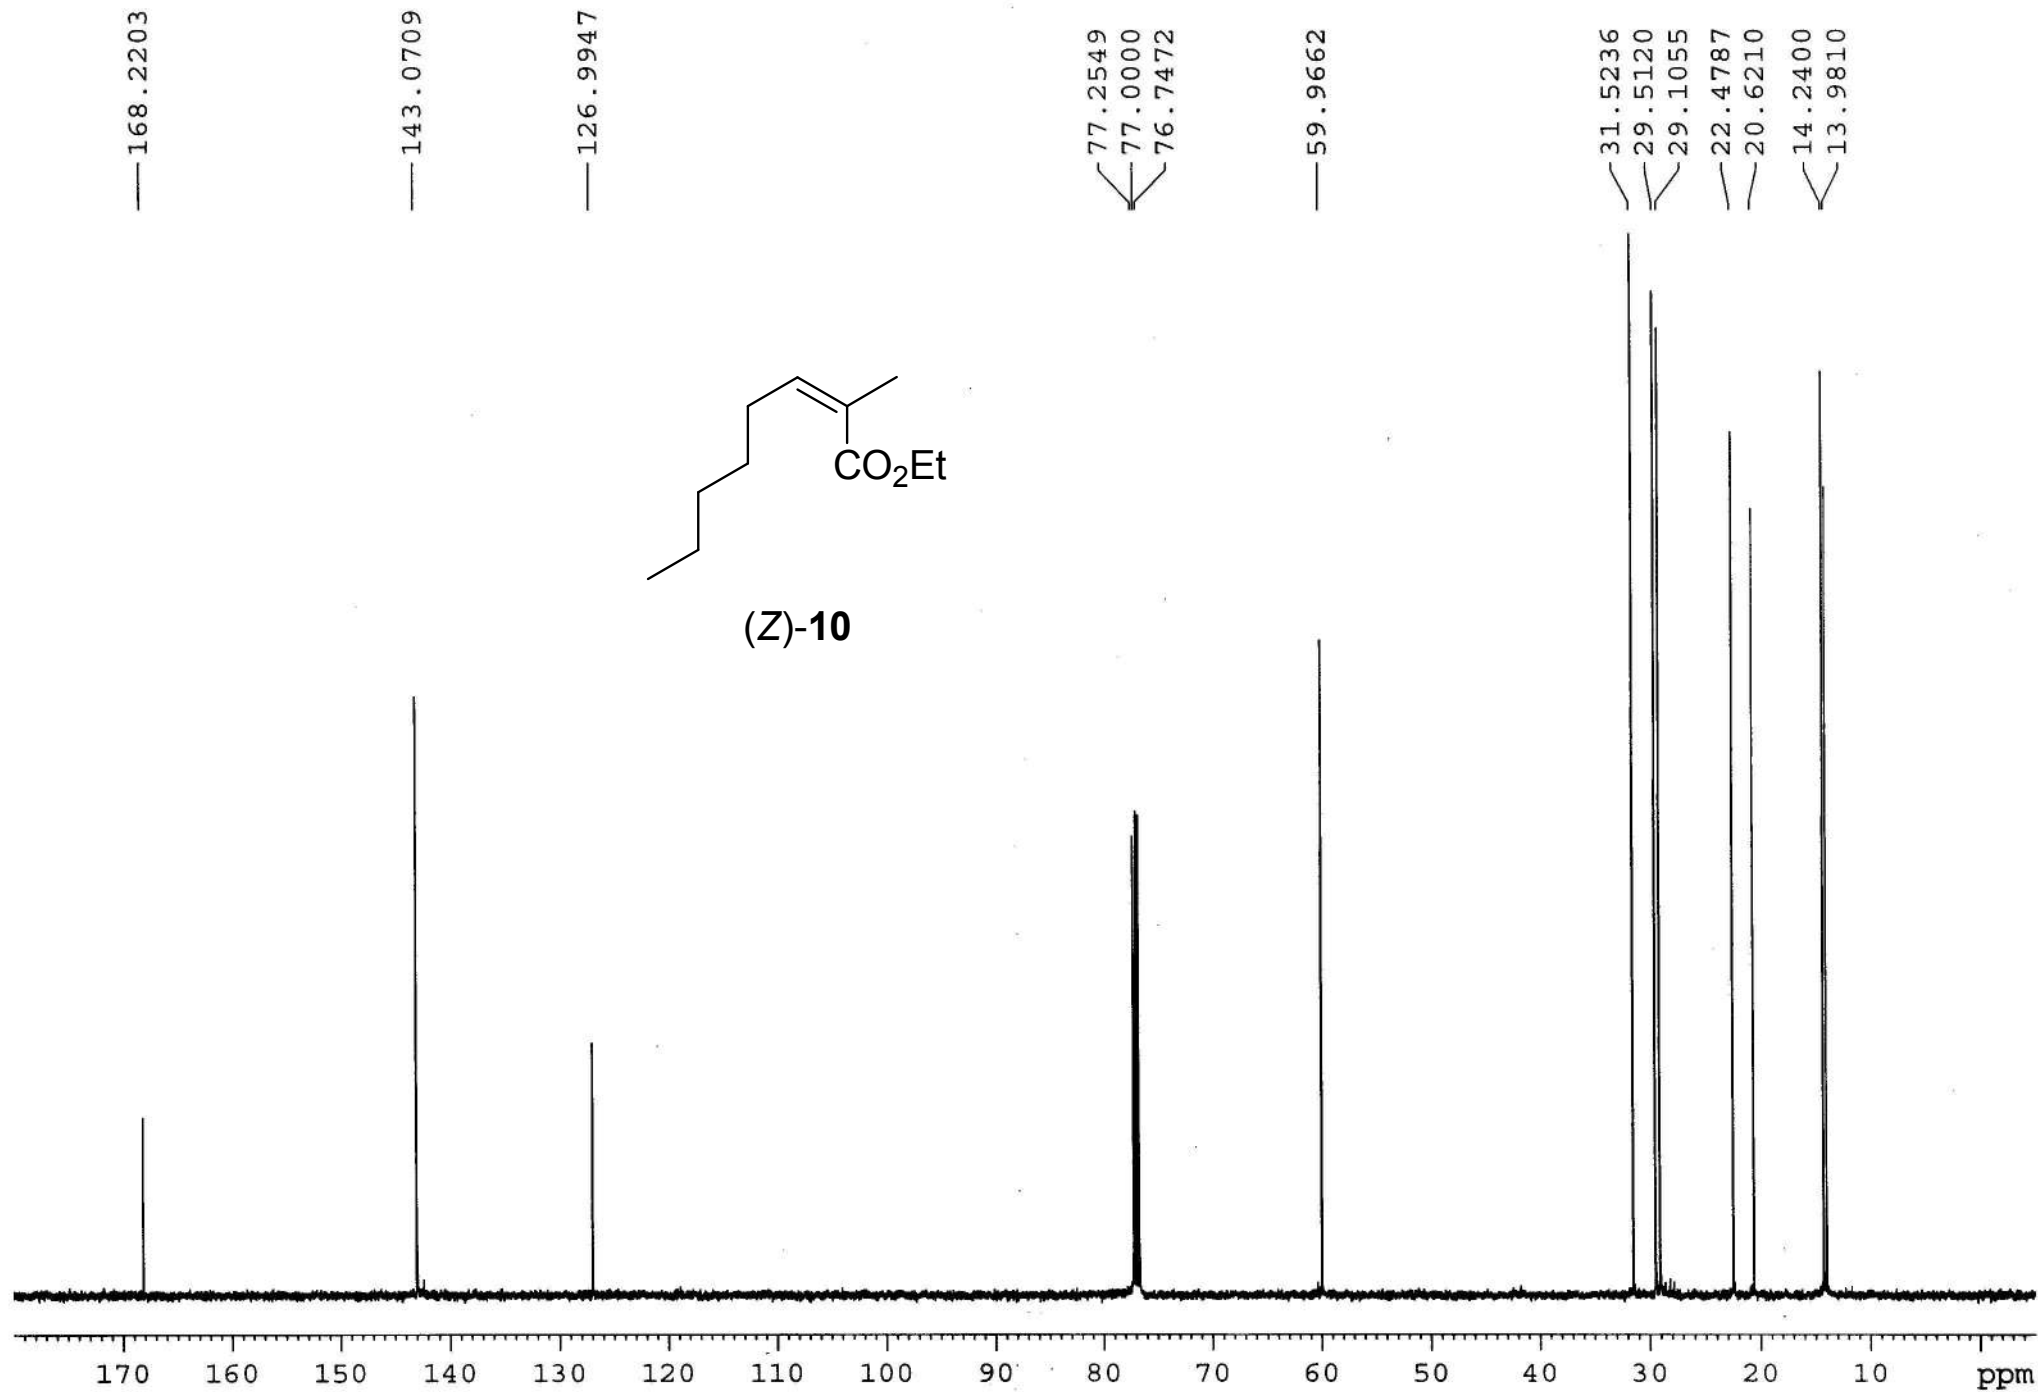

130-4-P329

D:\DATA\小林\130-4-P329\NON\_E7.als

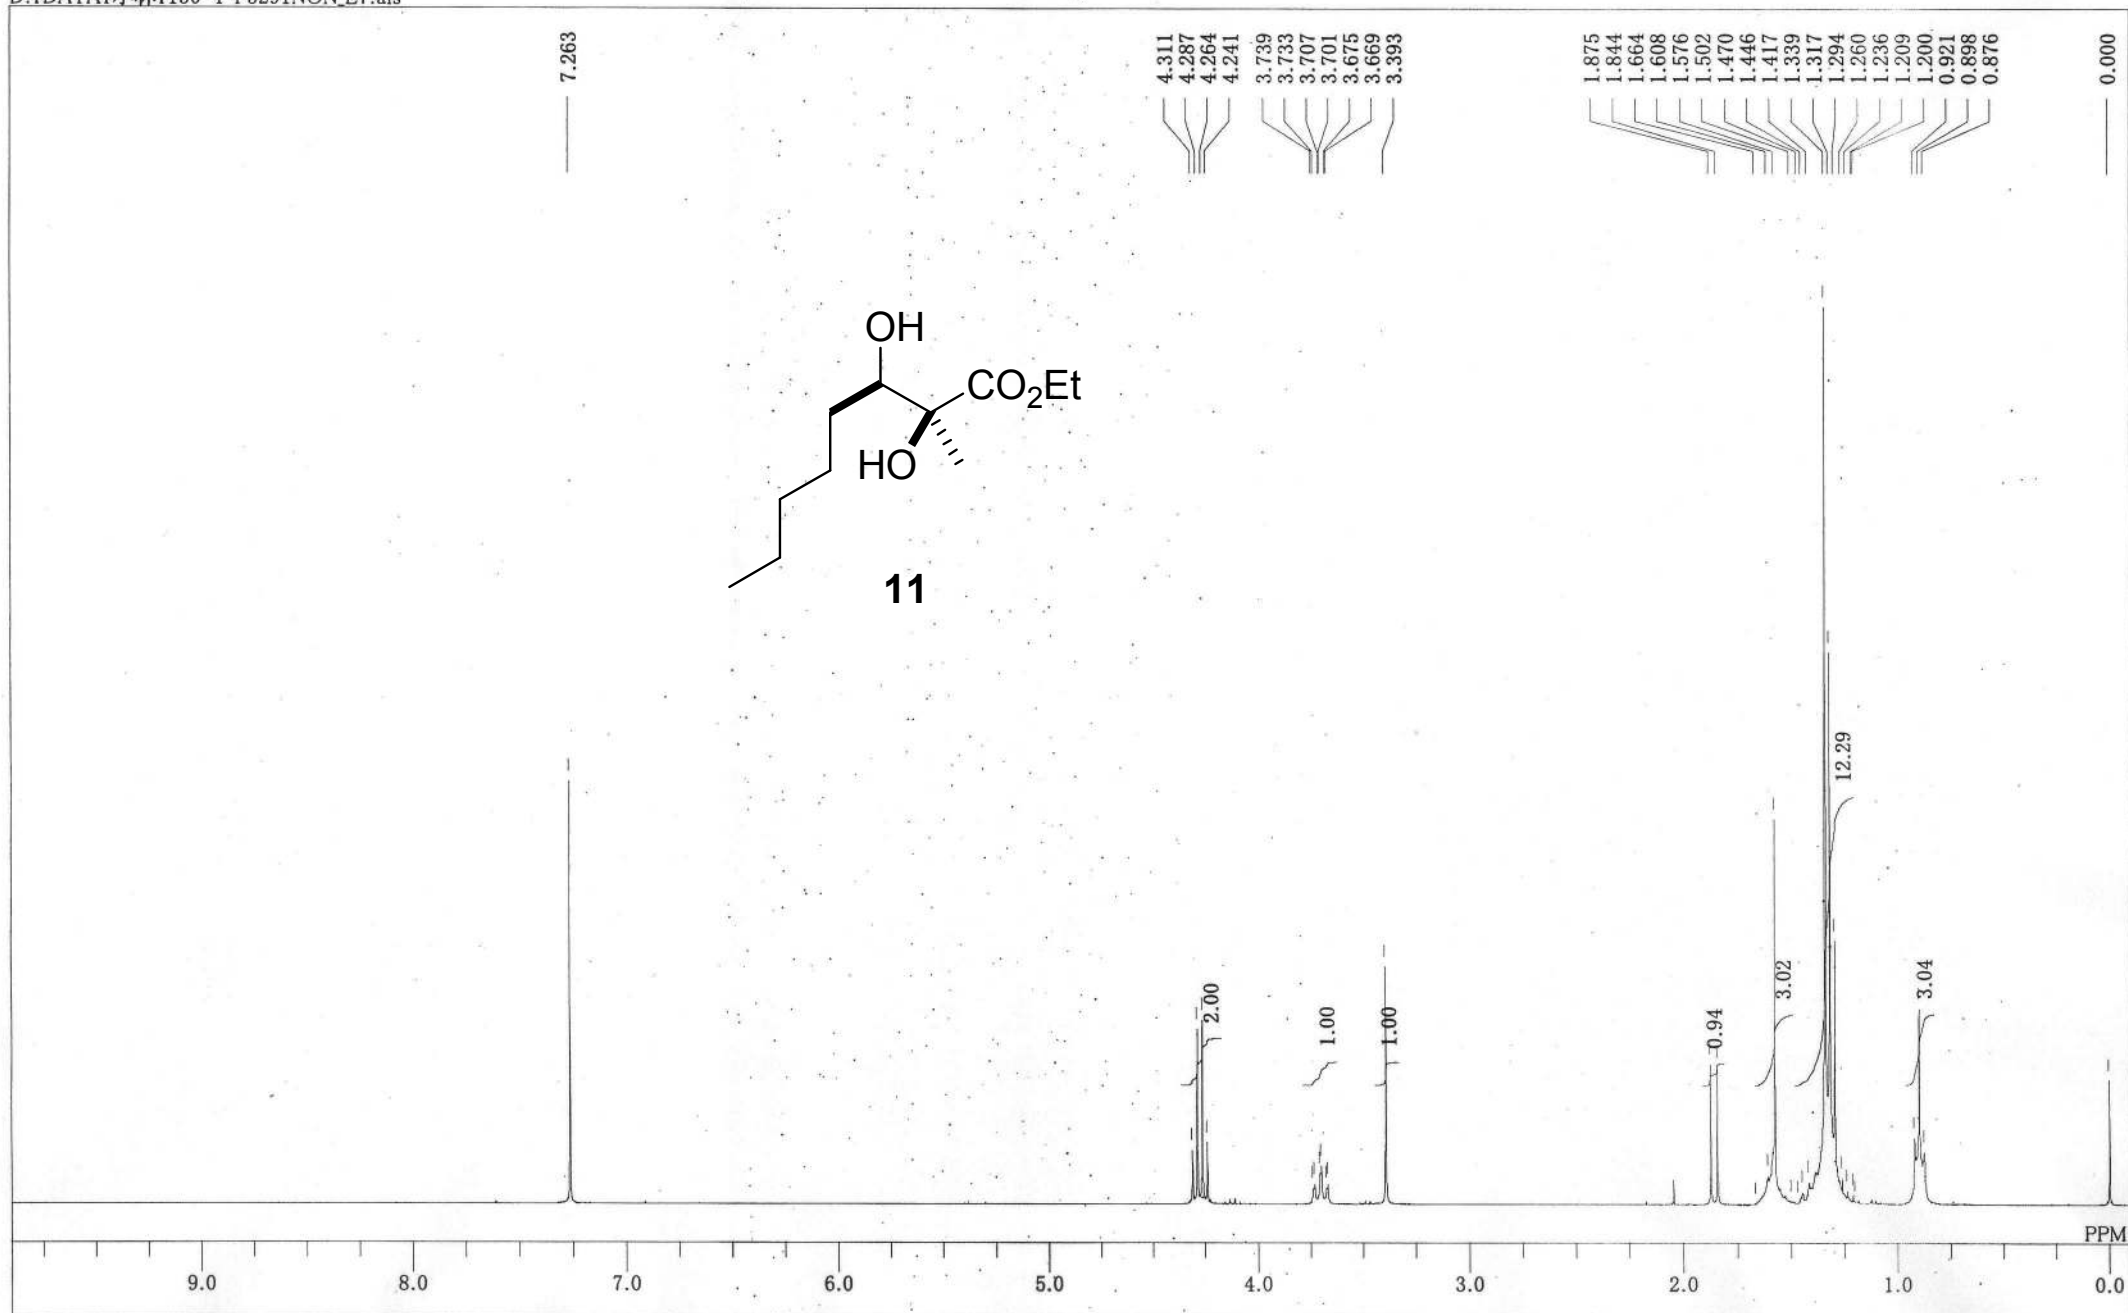

130-4-P329

D:\DATA\小林\130-4-P3292BCM\_E15.als

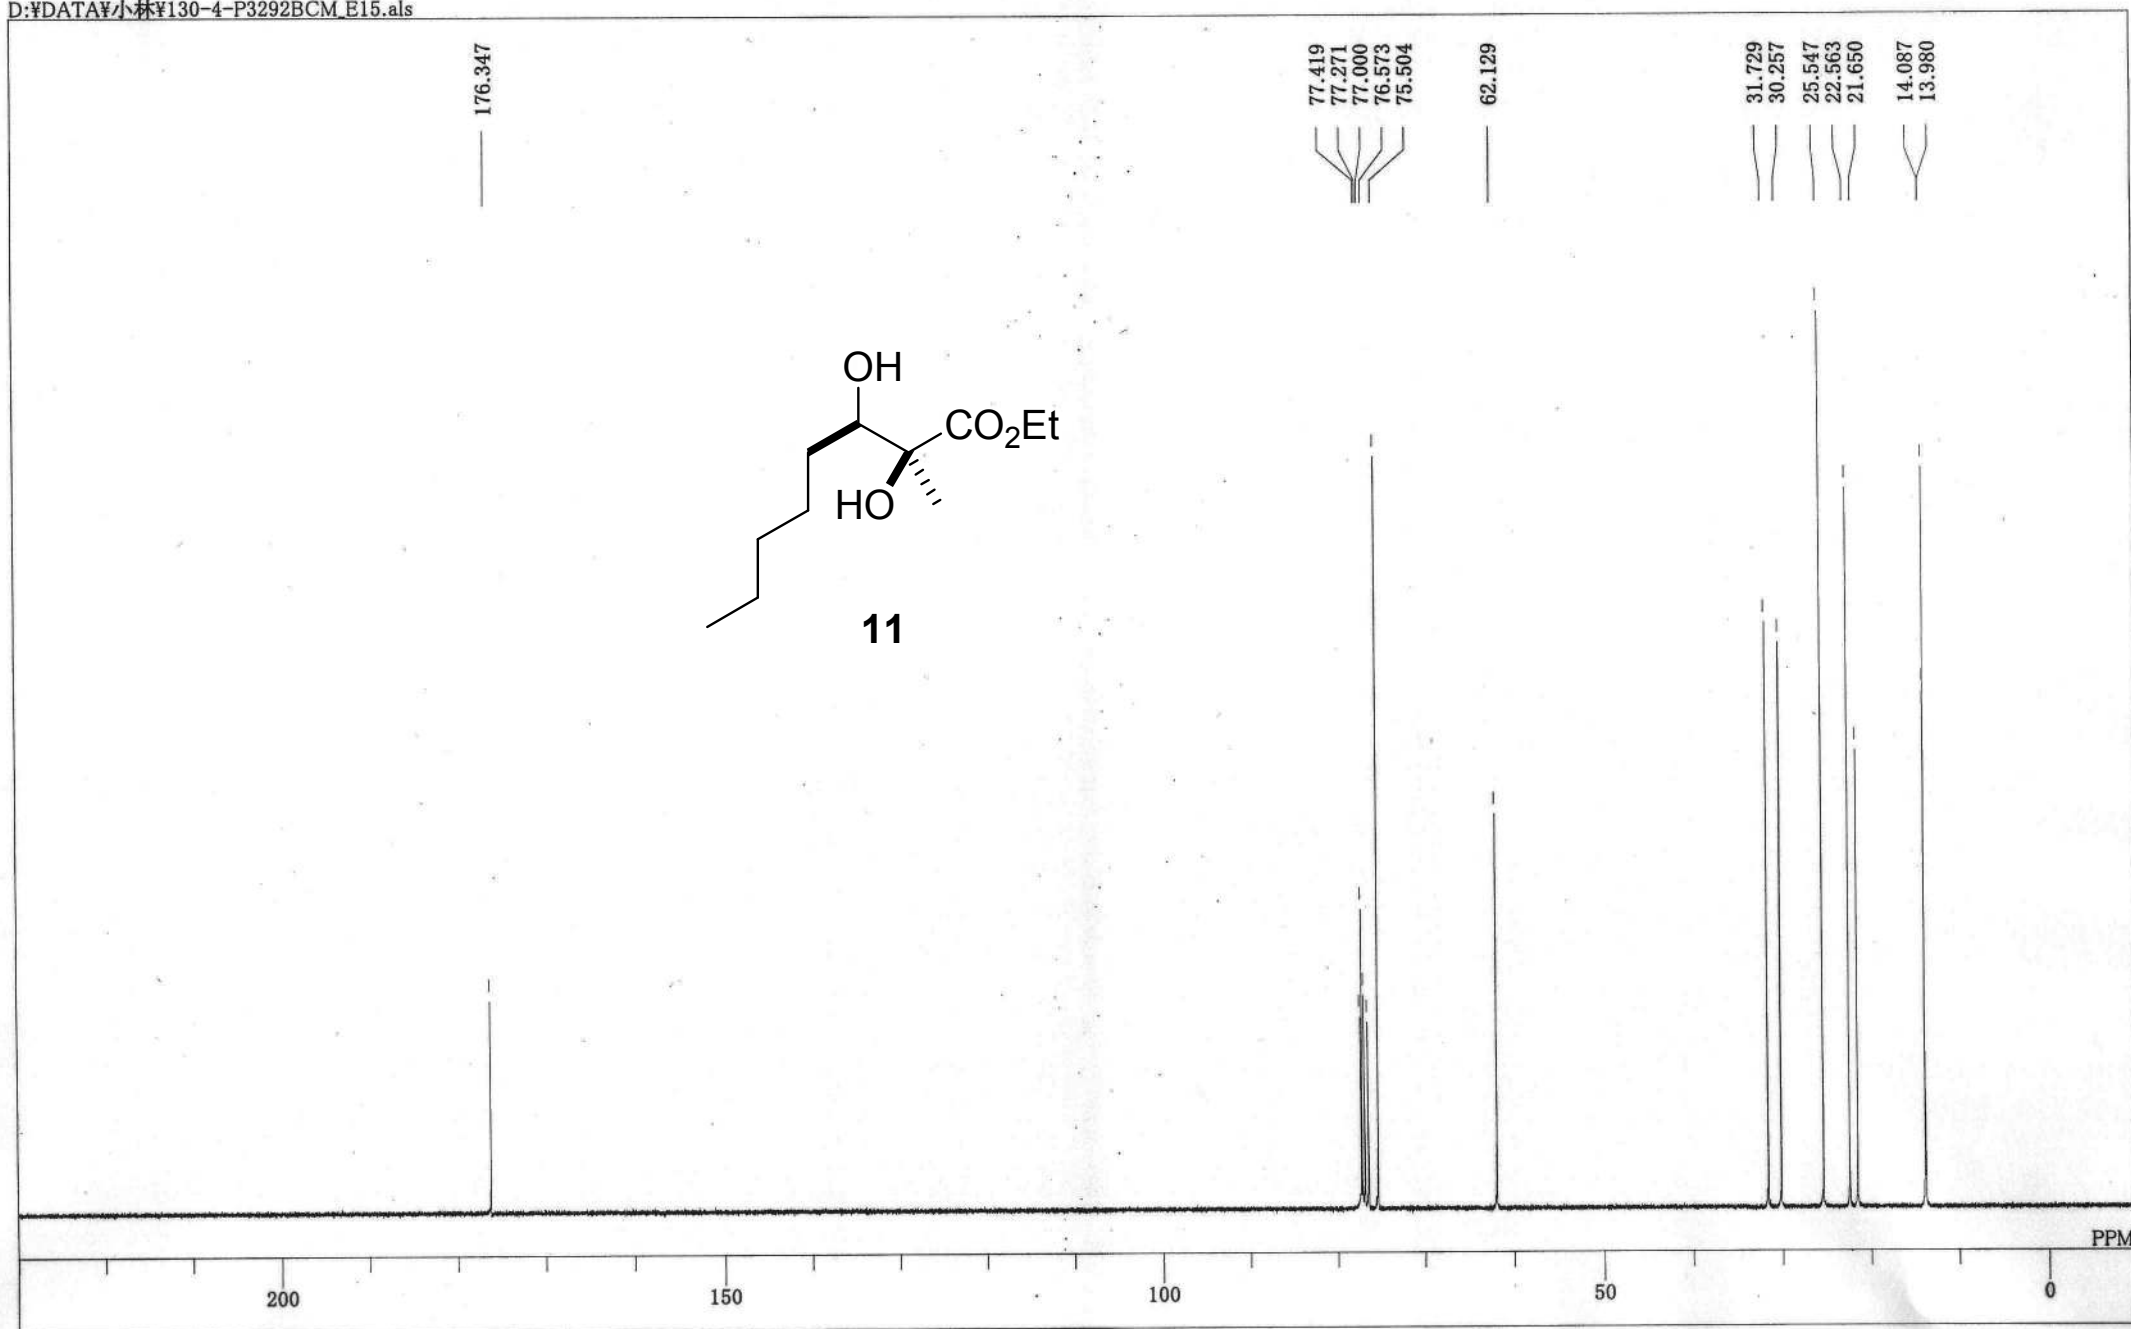

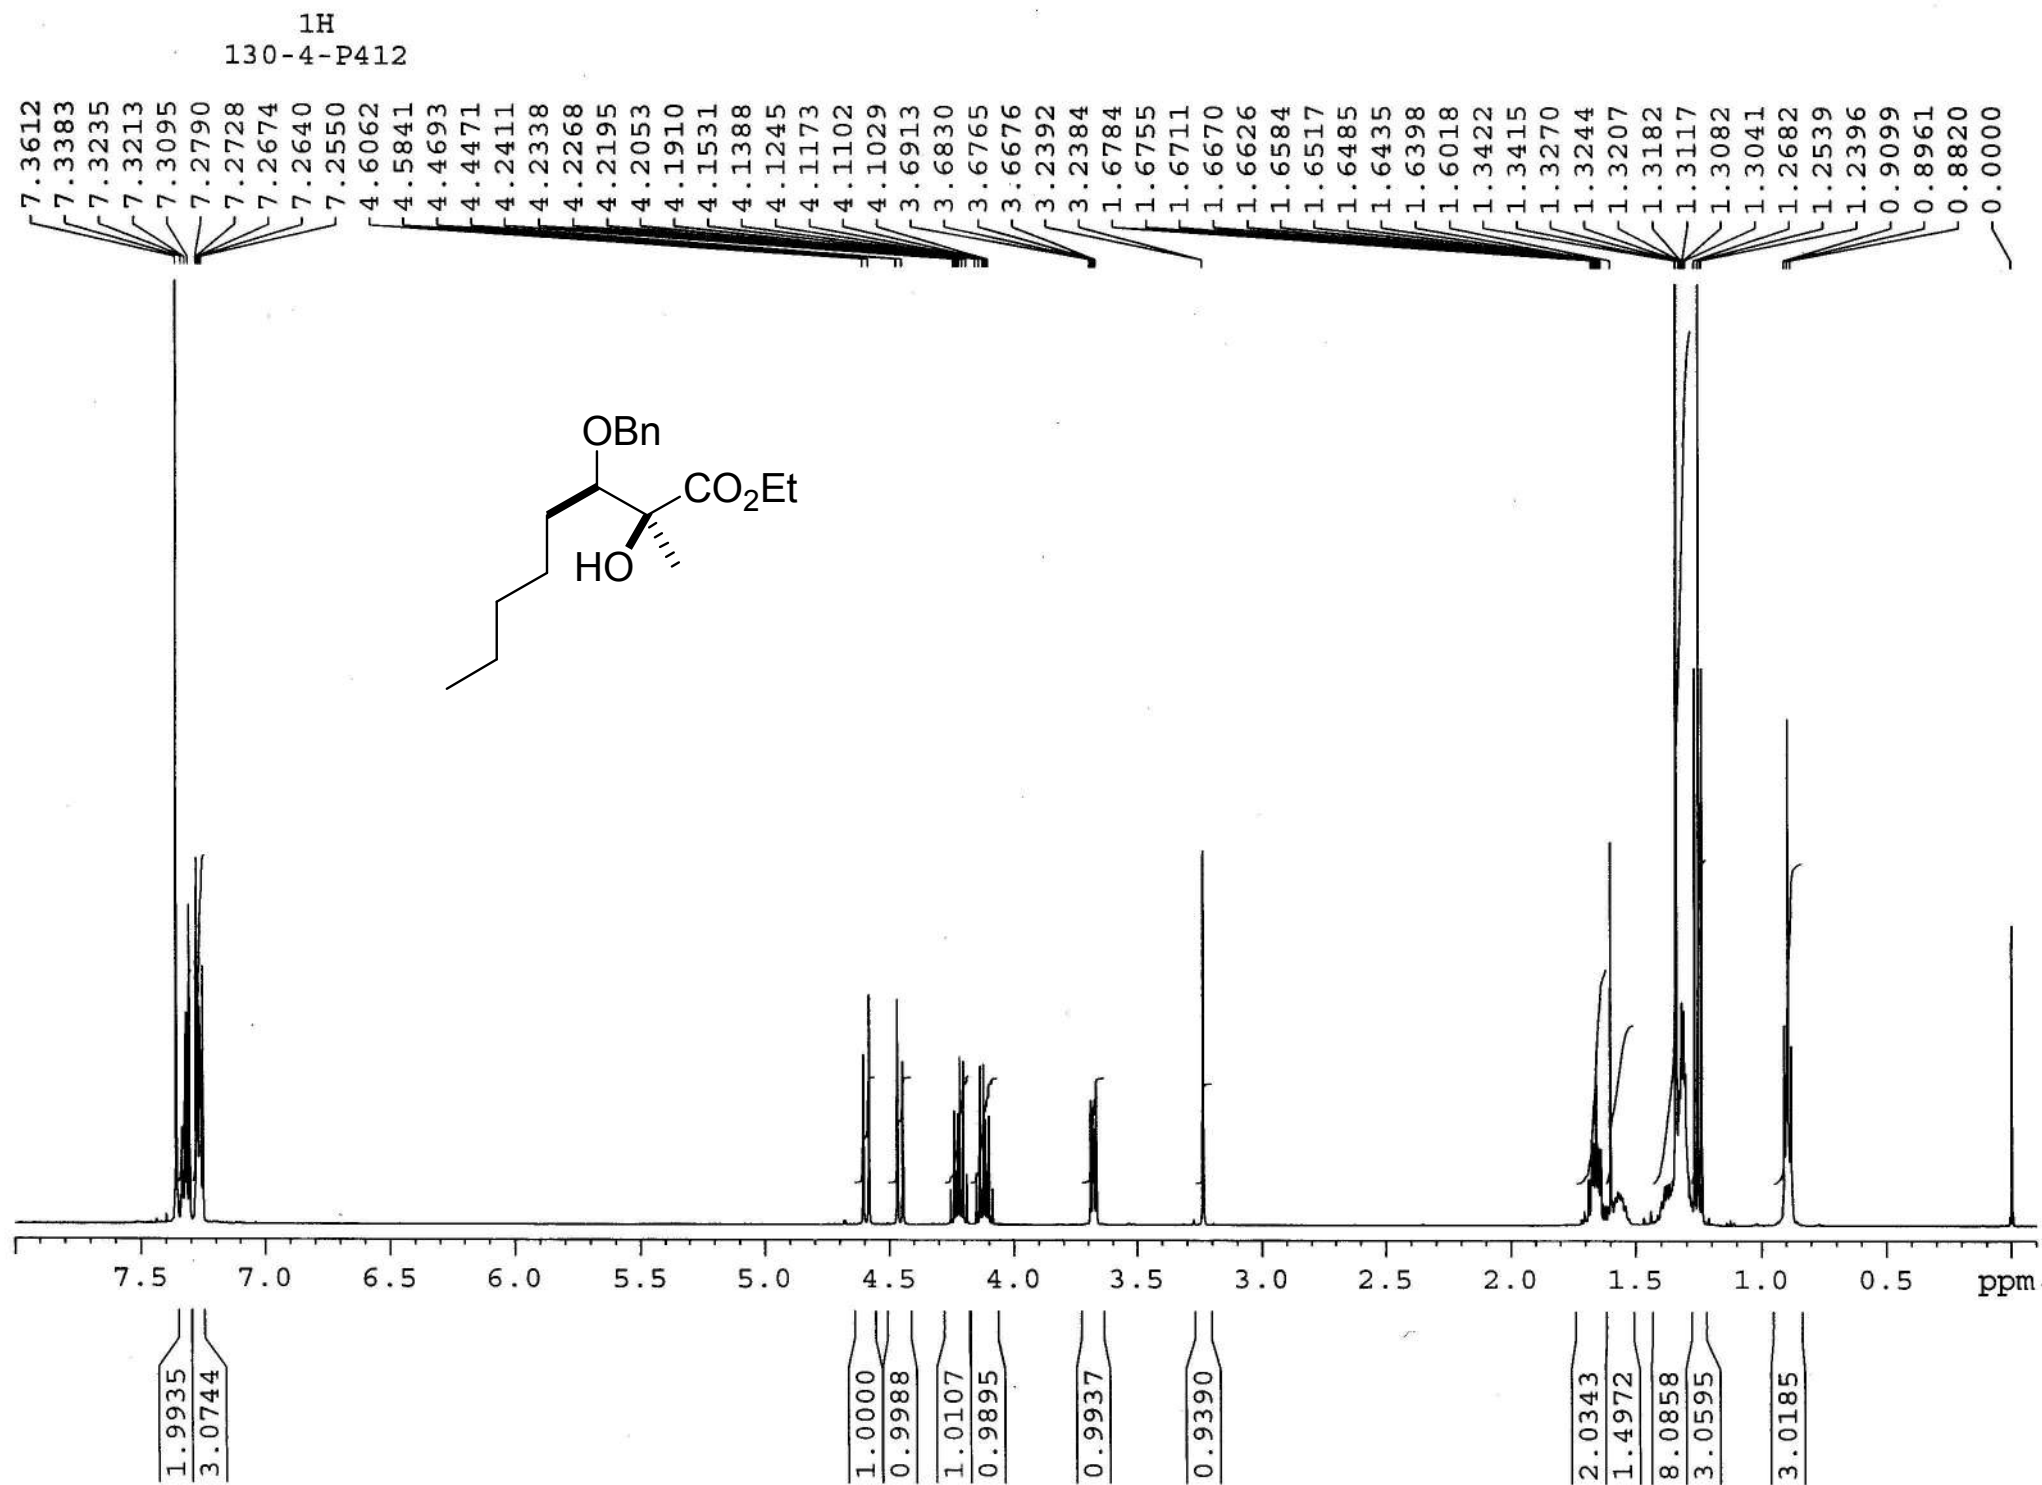

130-4-P412

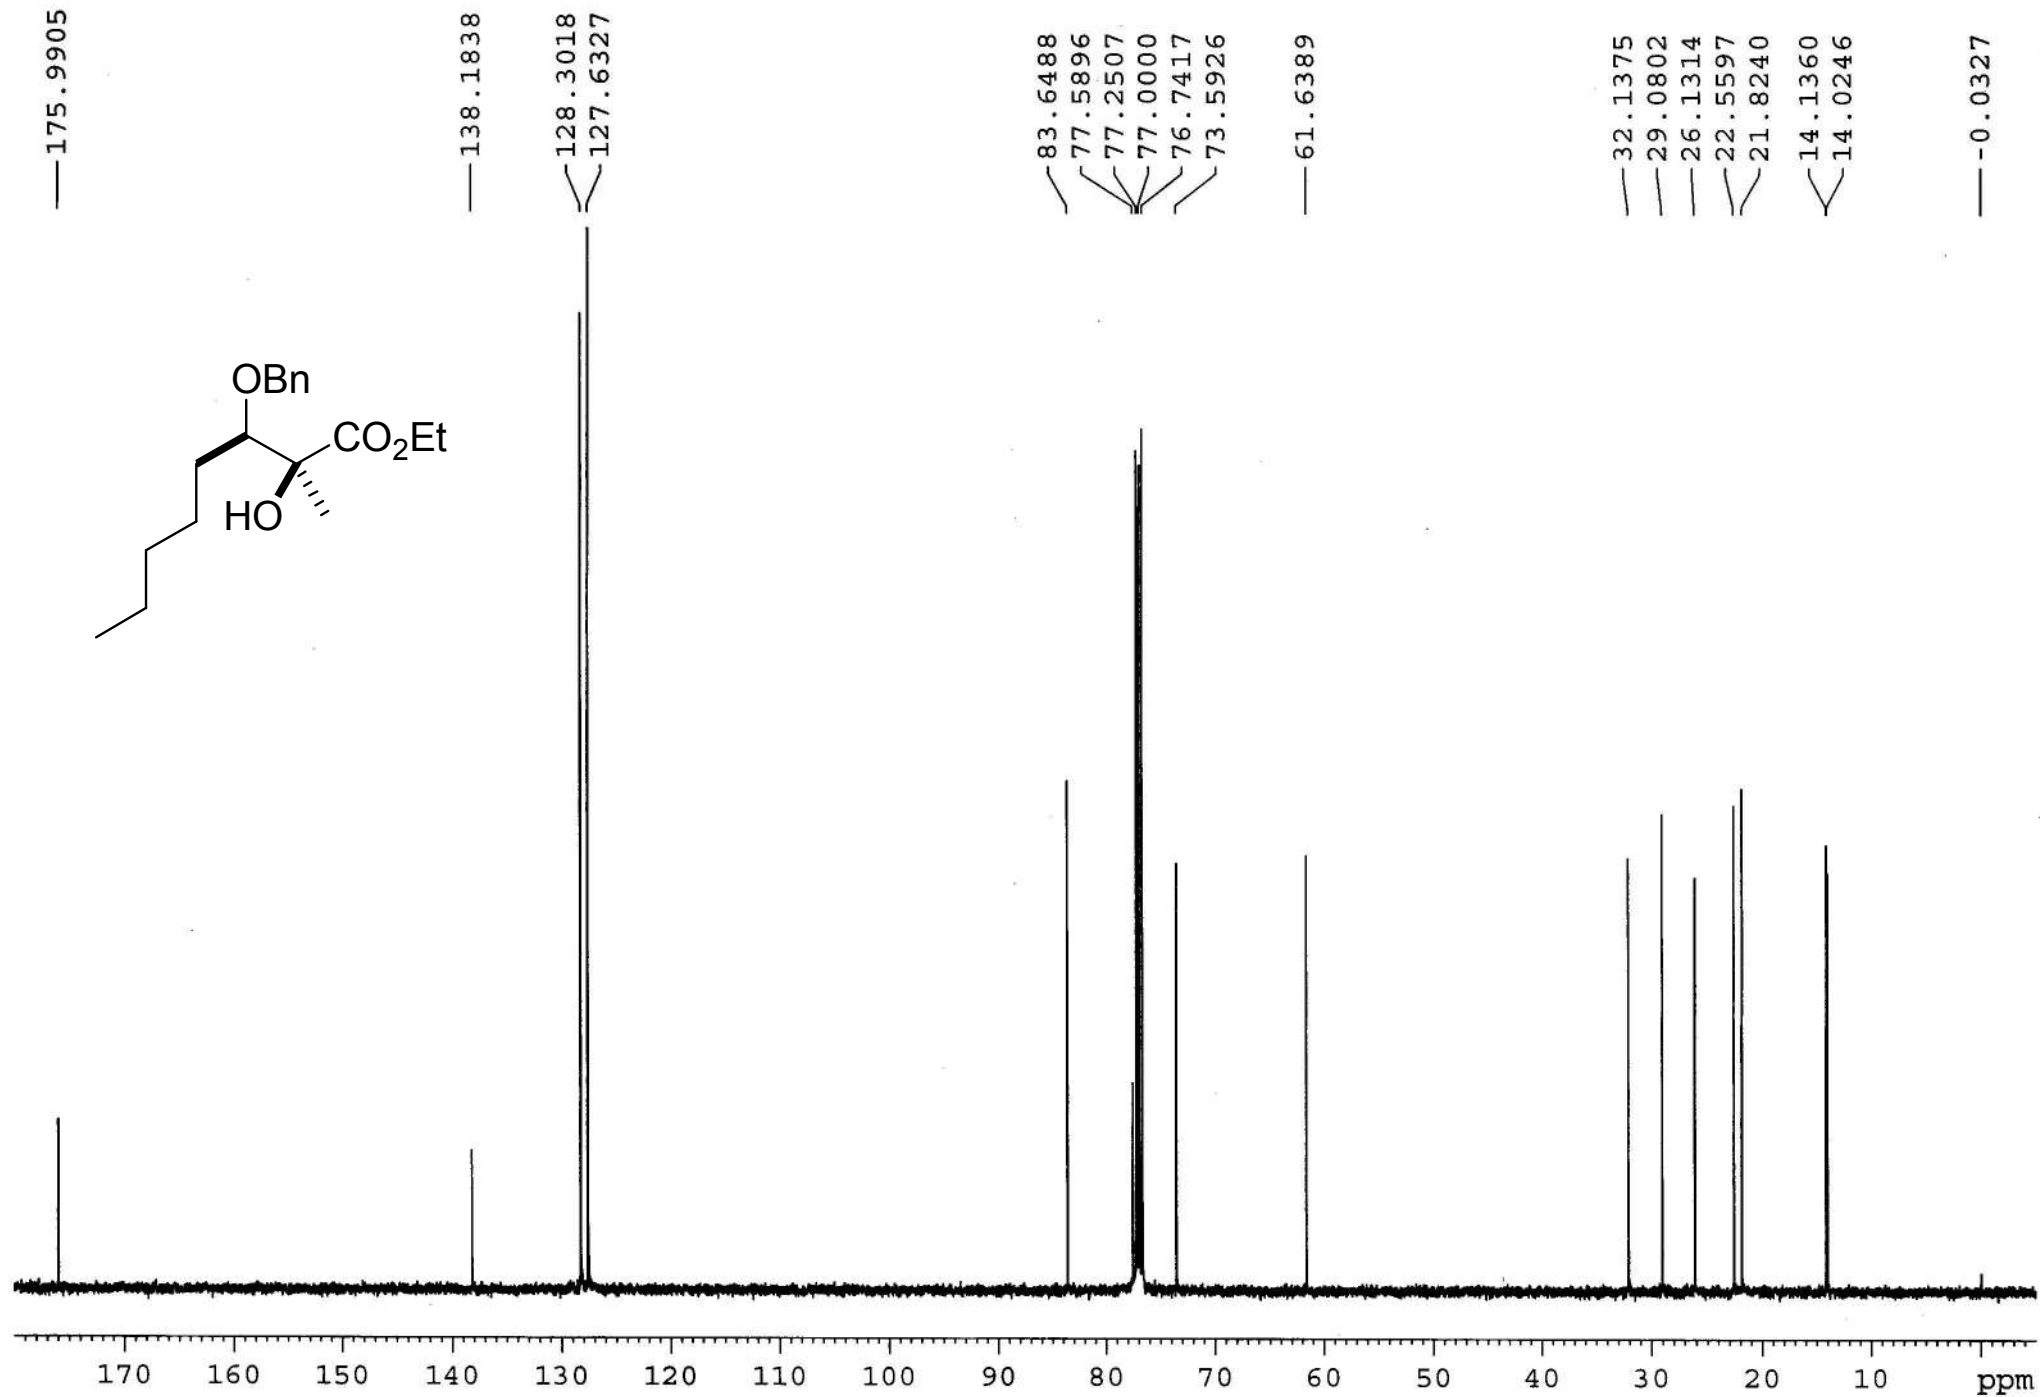

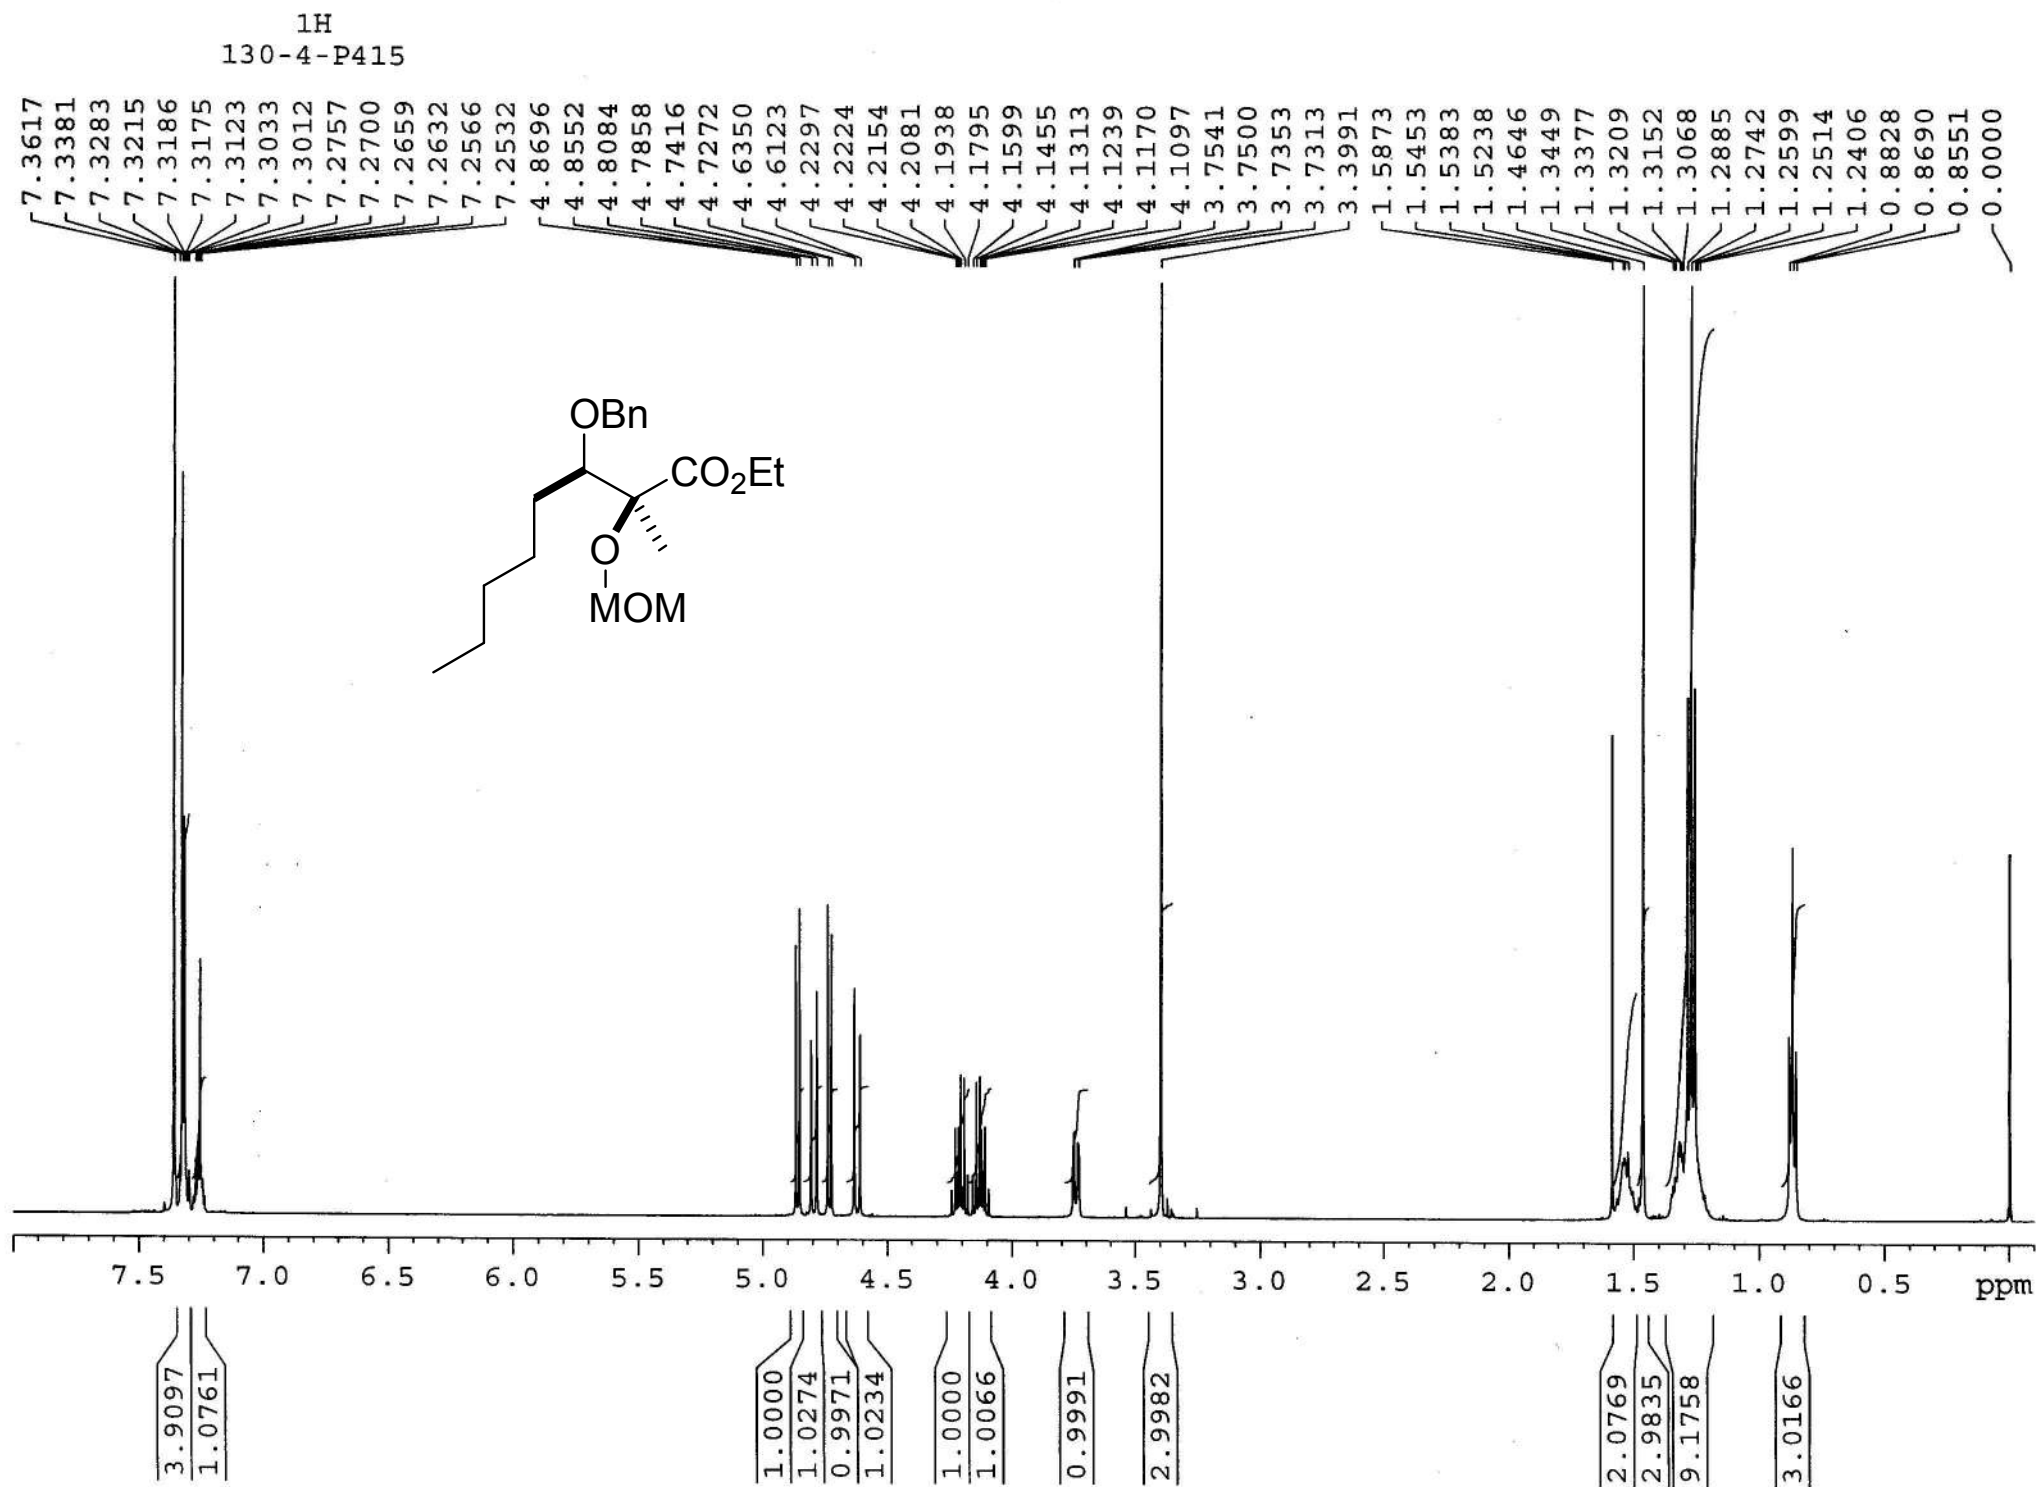

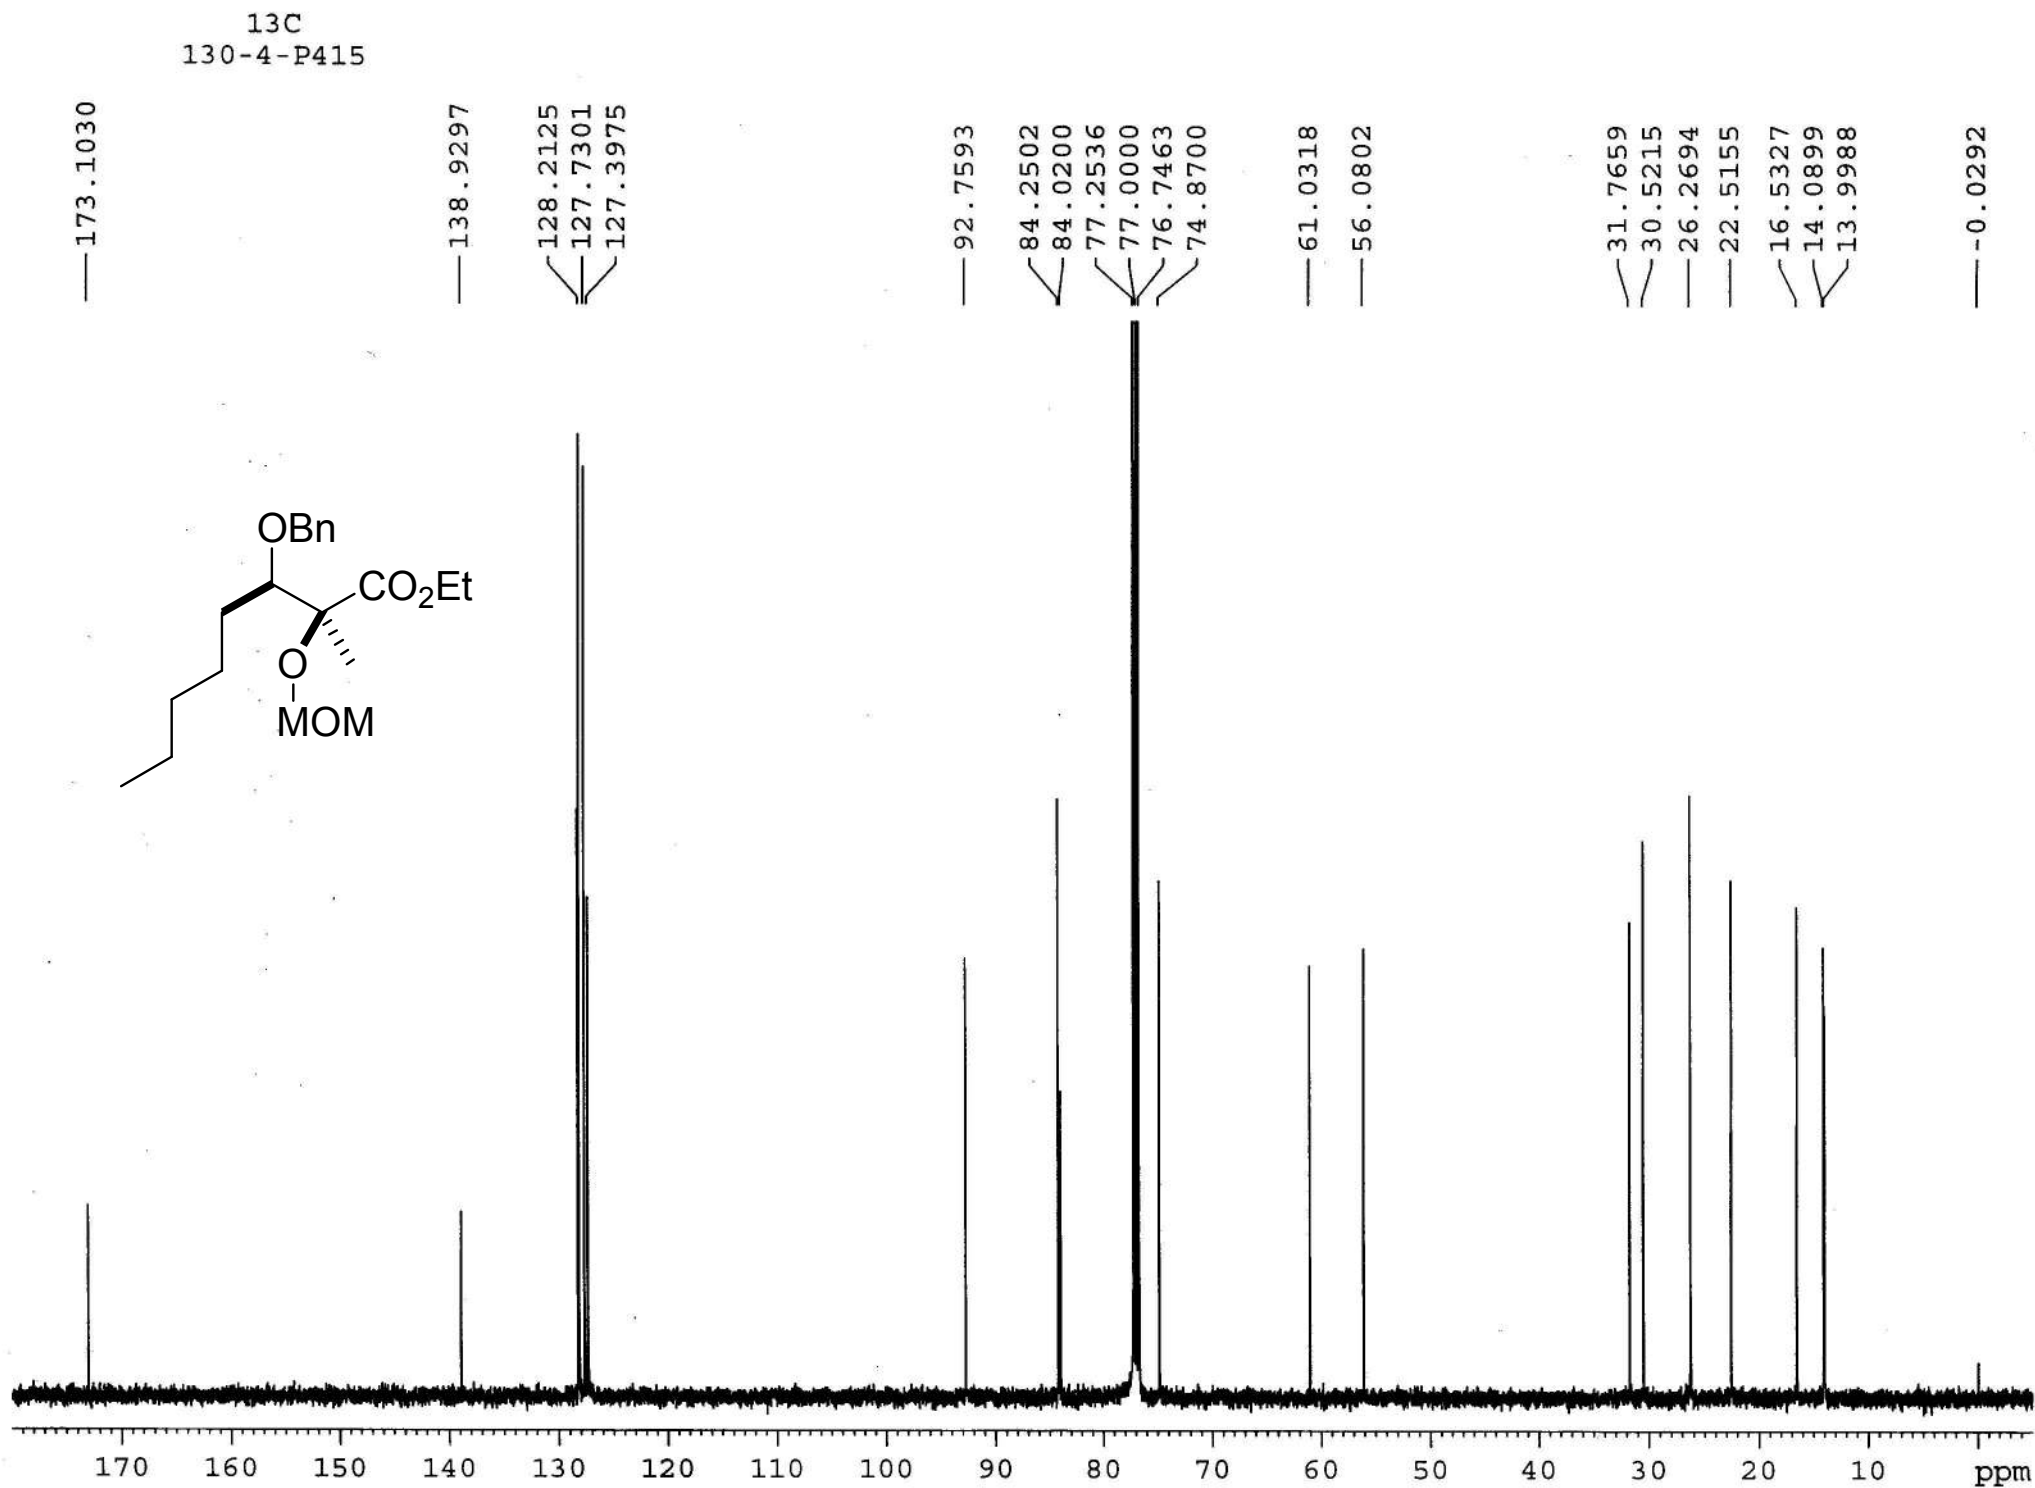

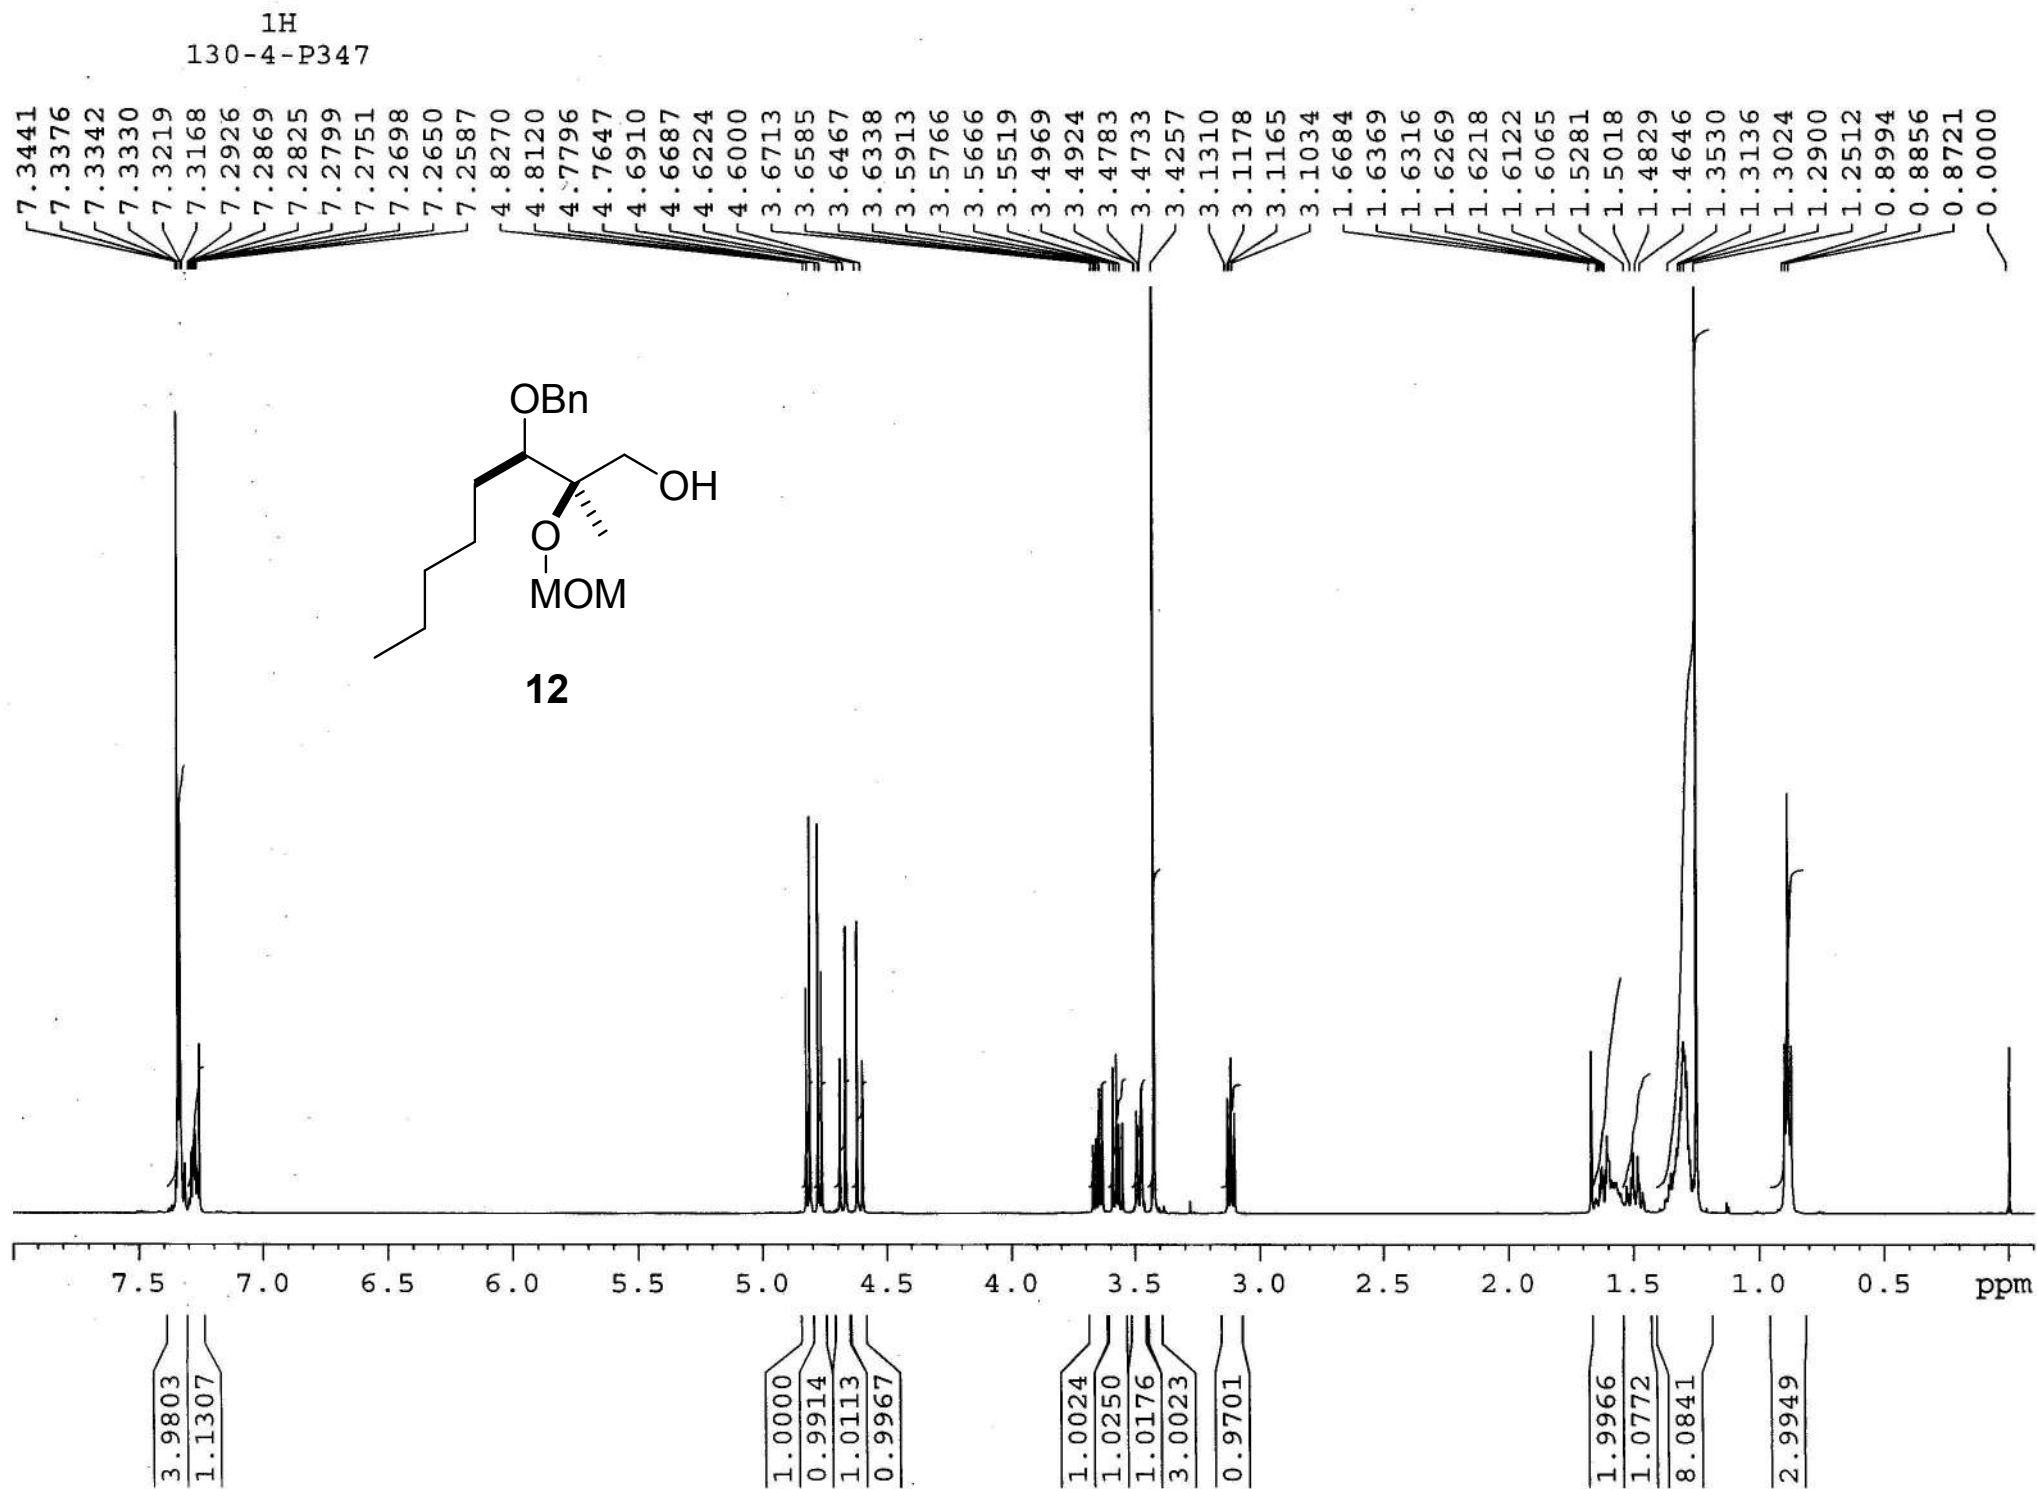

<sup>13</sup>C  
130-4-P347

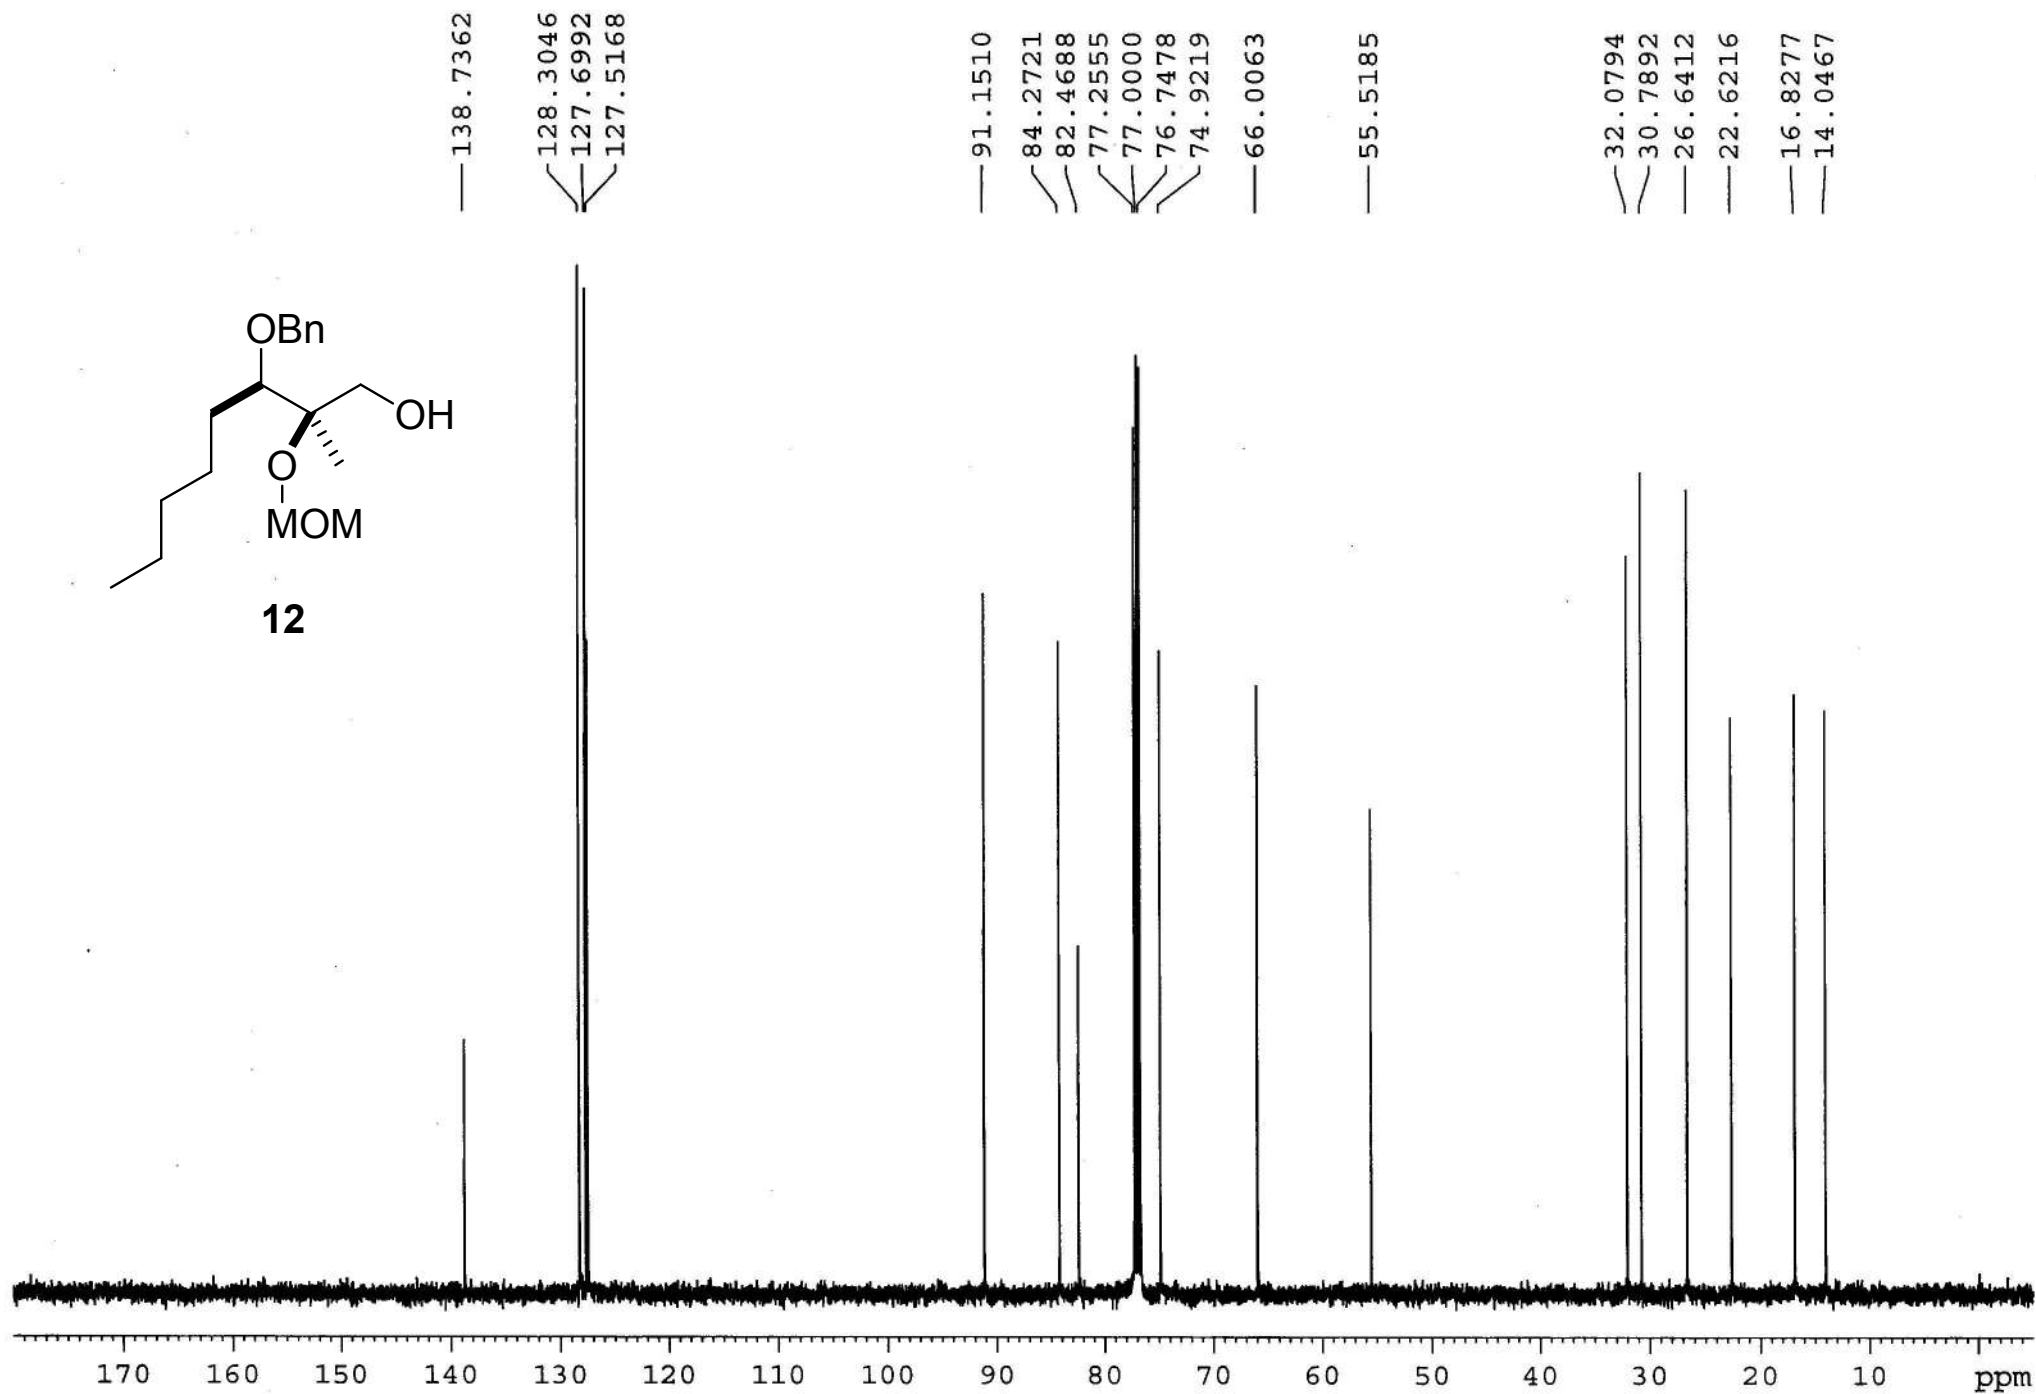

1H  
130-4-P364

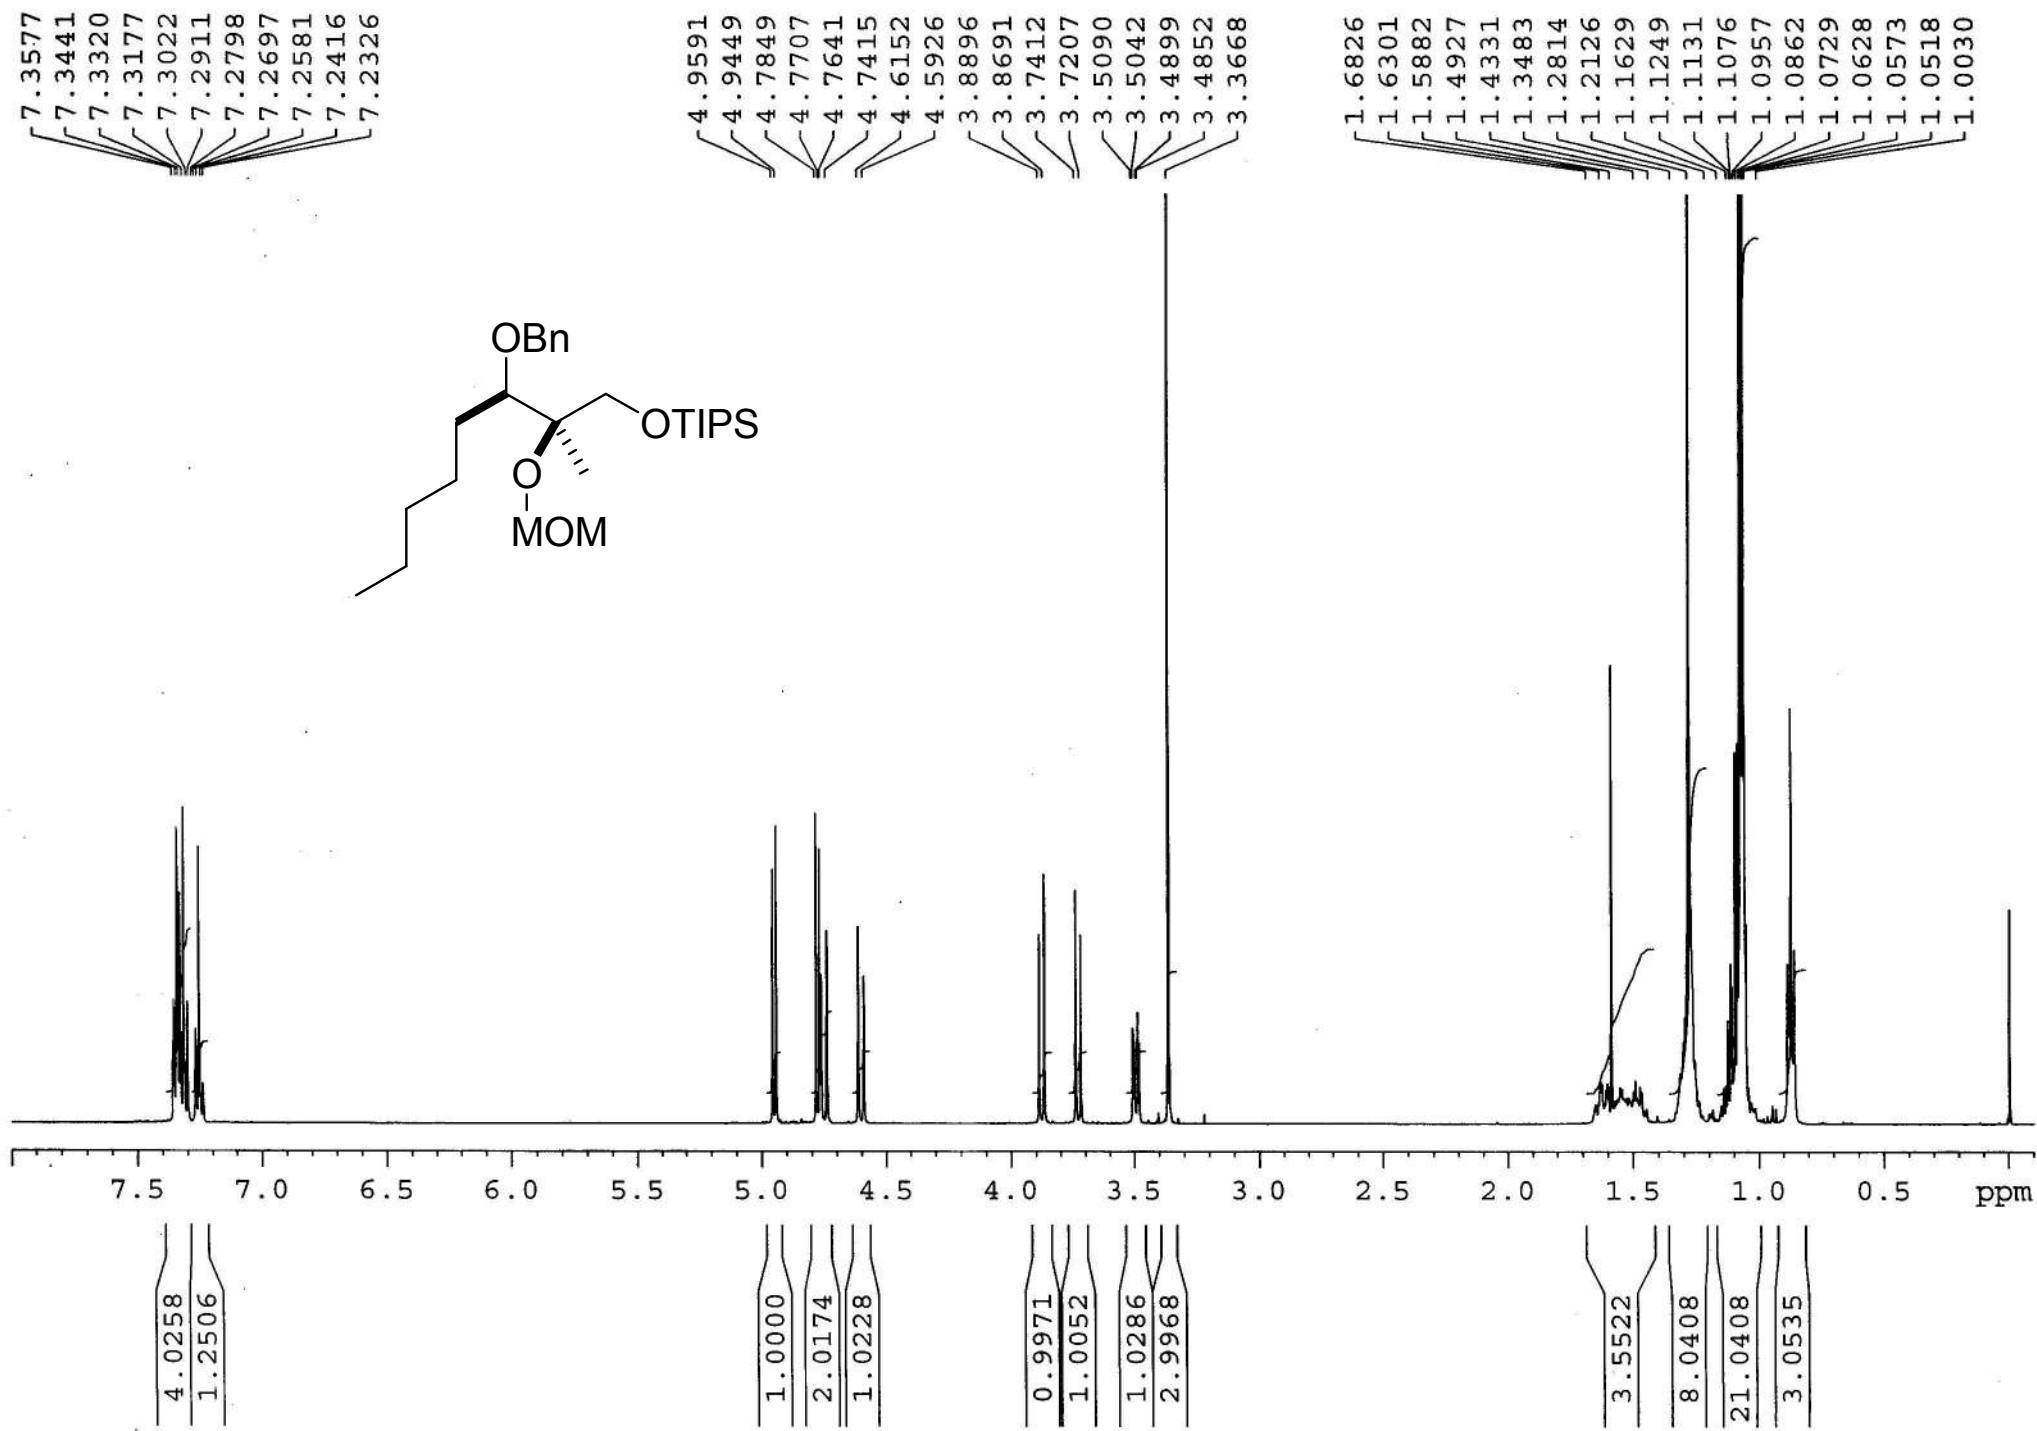

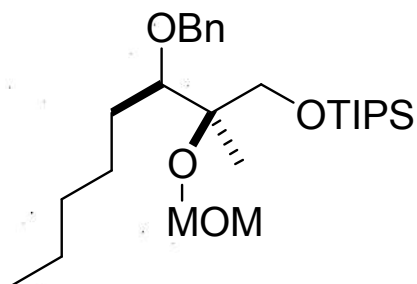

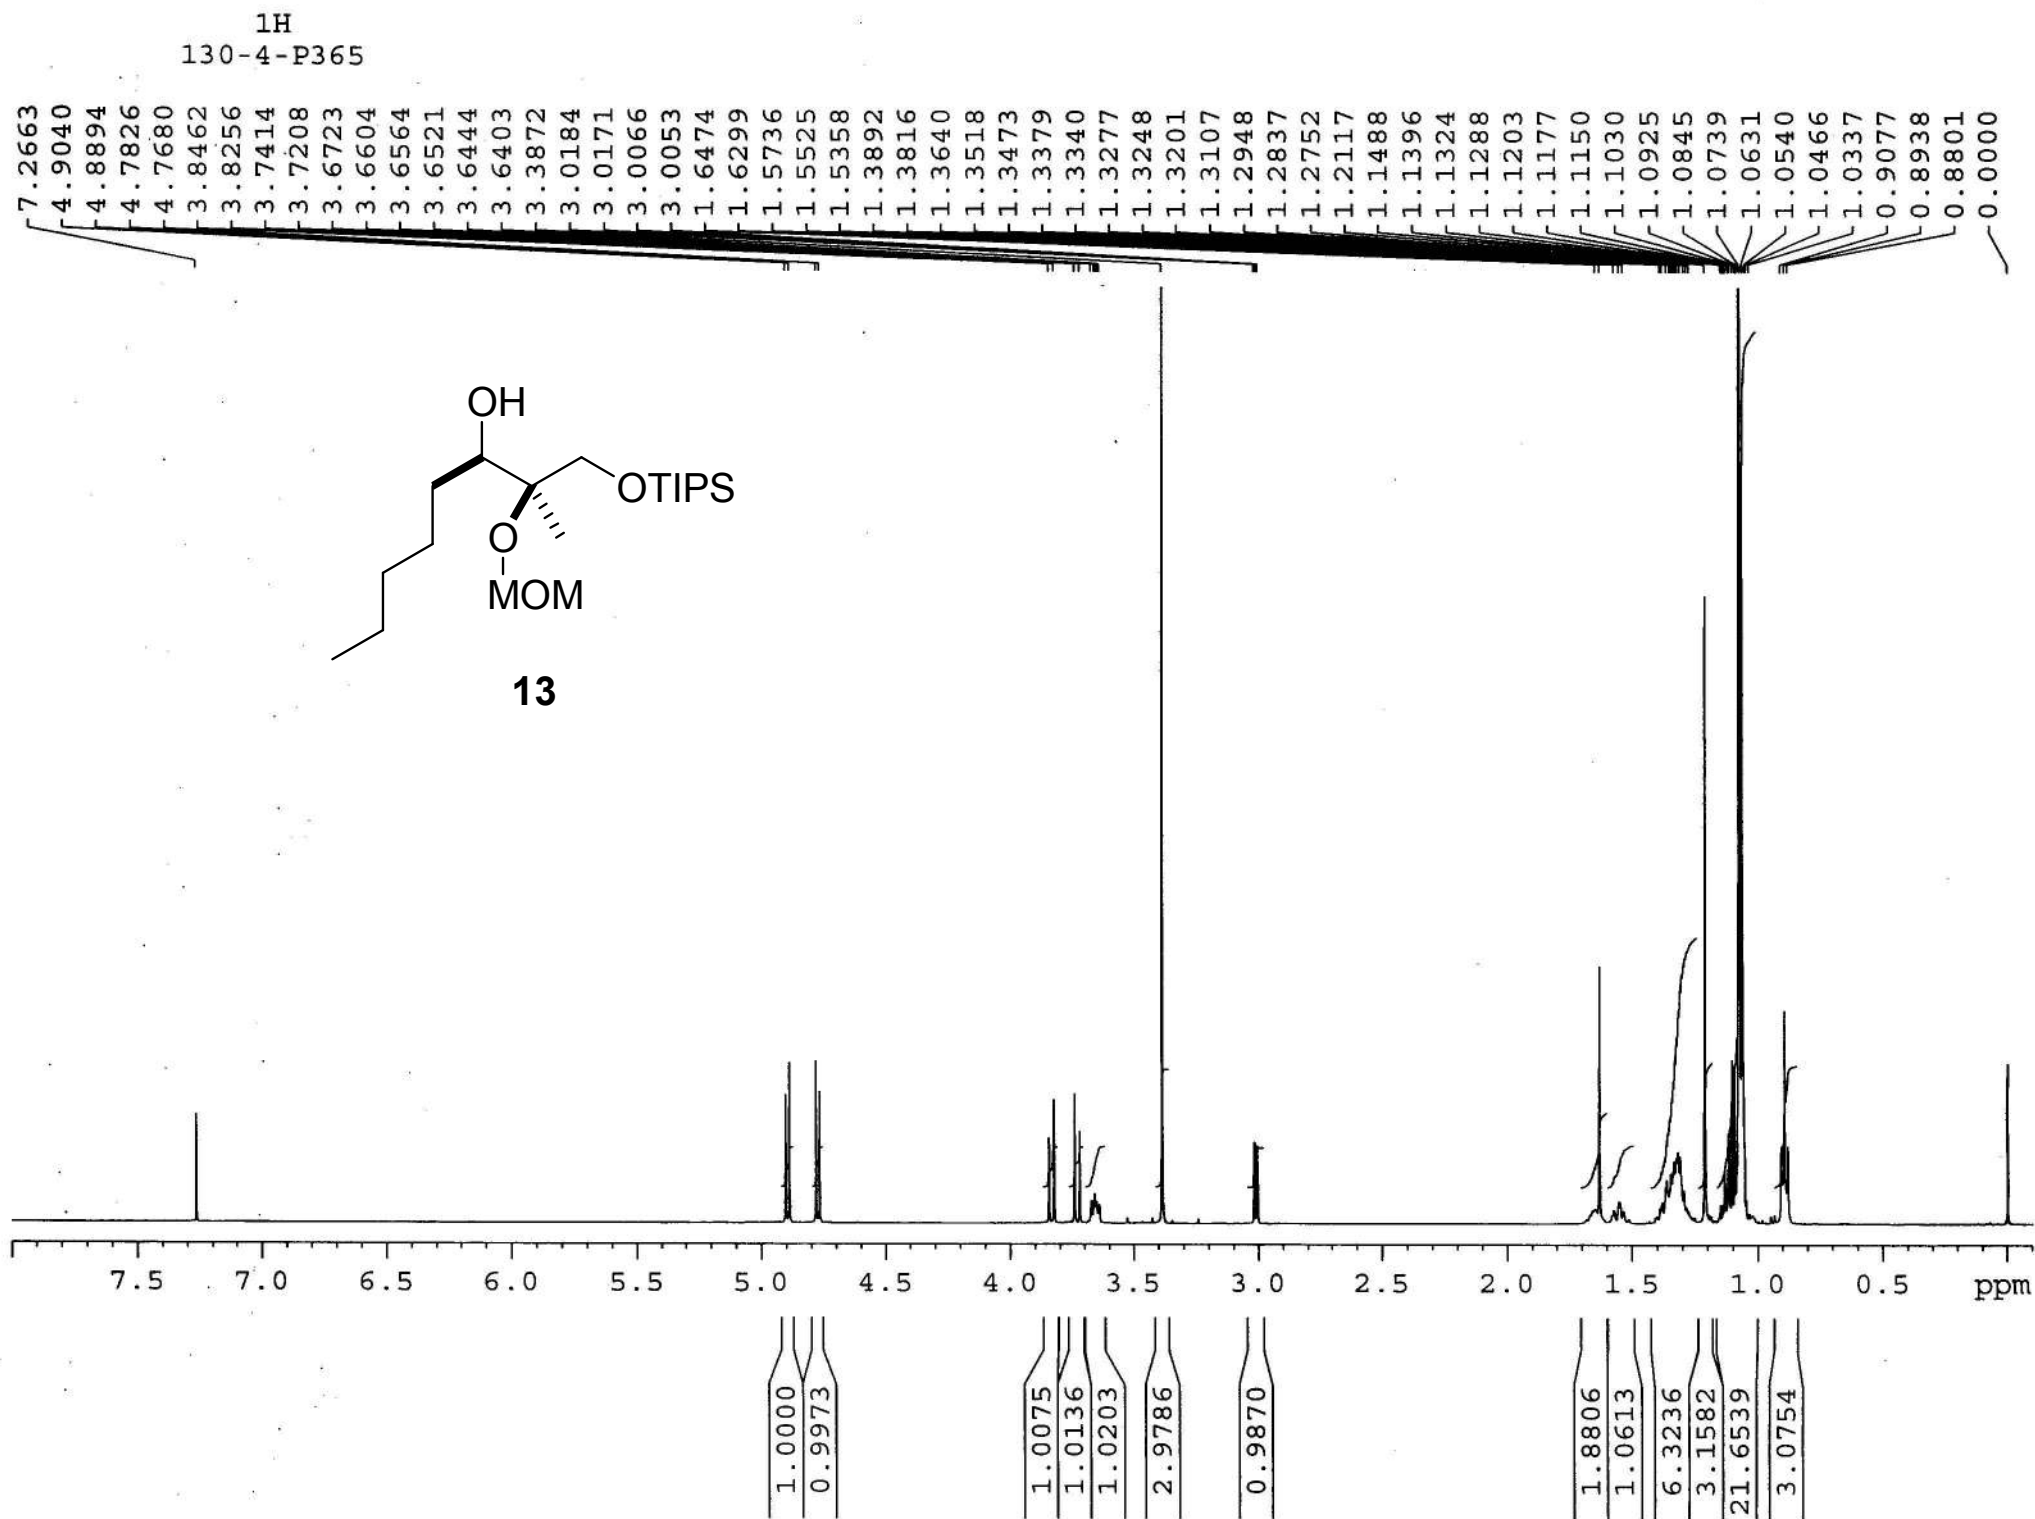

<sup>13</sup>C  
130-4-P365

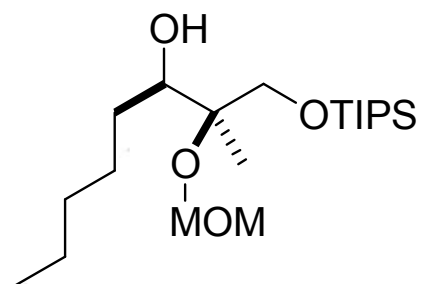

**13**

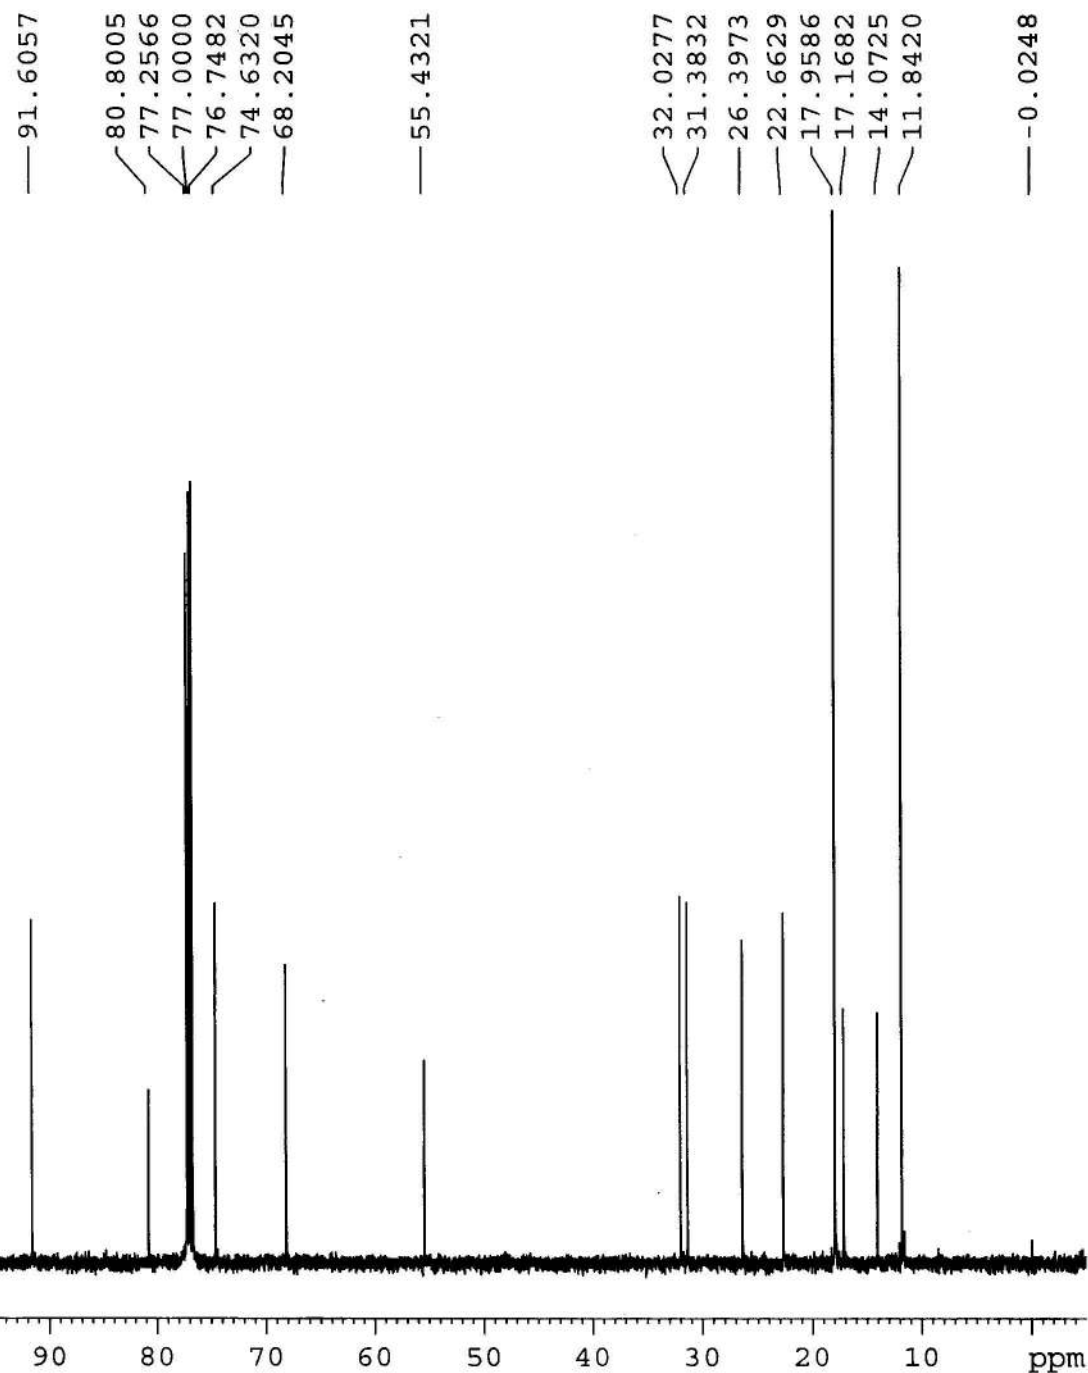

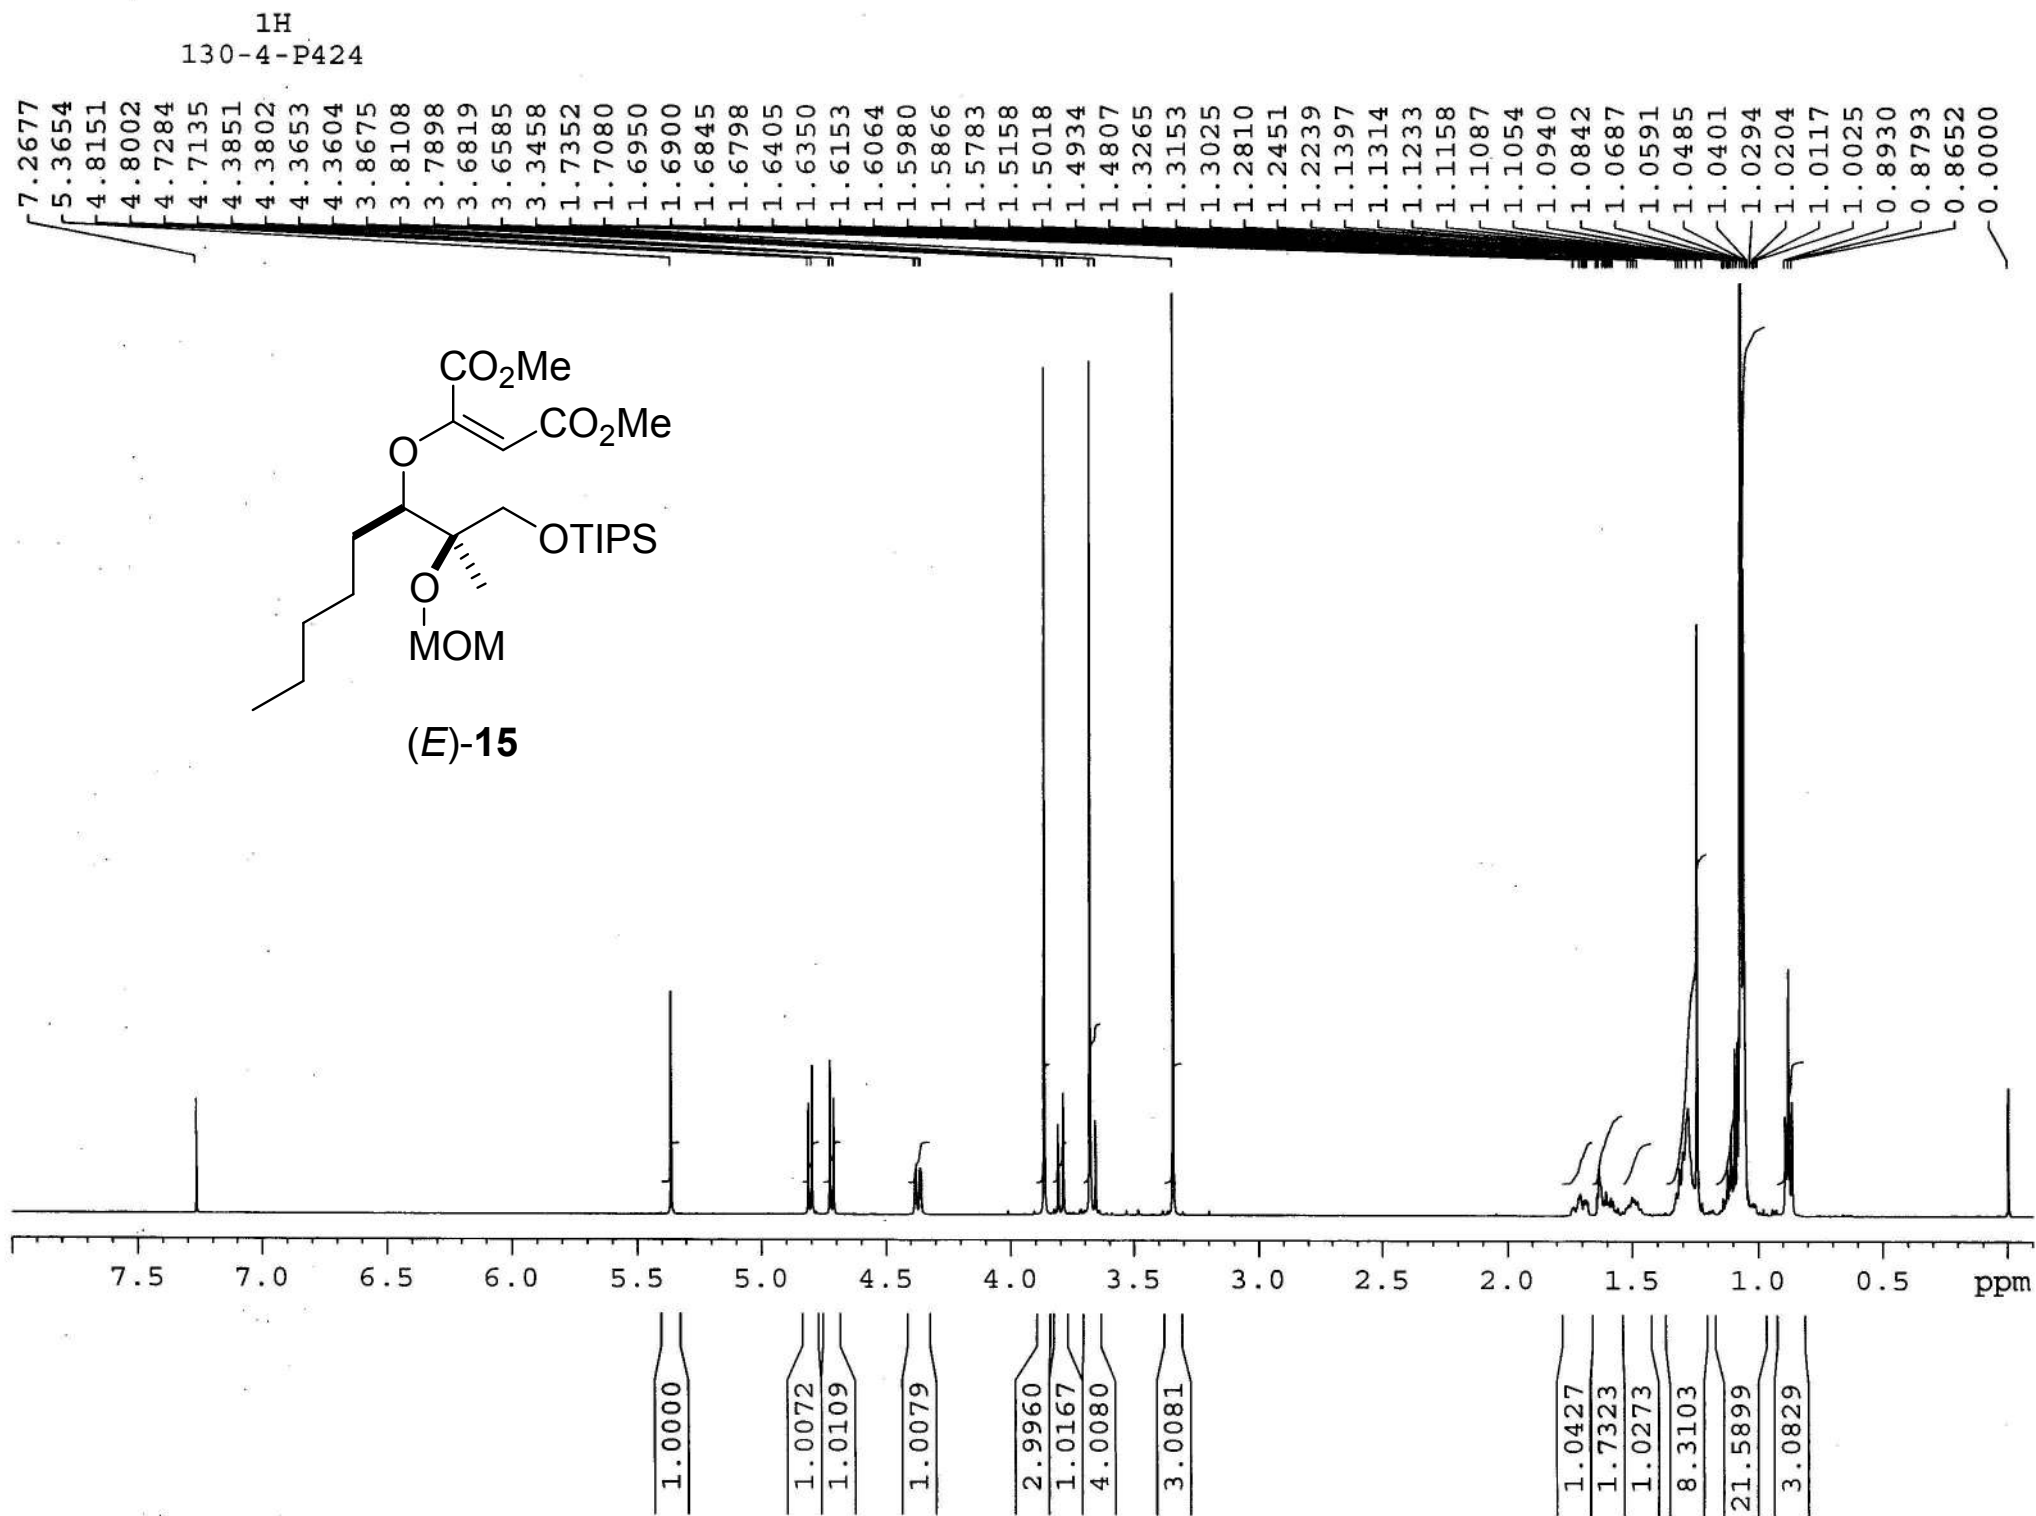

<sup>13</sup>C  
130-4-P424

167.0835  
164.3173  
163.1819

93.4576  
91.4709

84.3621  
80.6442  
77.2523  
77.0000  
76.7445

66.6643

55.3492  
52.6606  
51.3683

31.8653  
29.7548  
25.8168  
22.3807  
17.9398  
16.5715  
13.9576  
11.9025

-0.0360

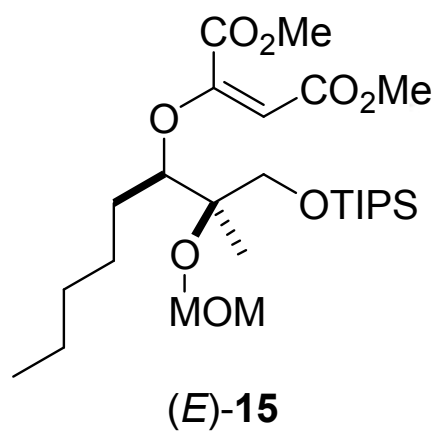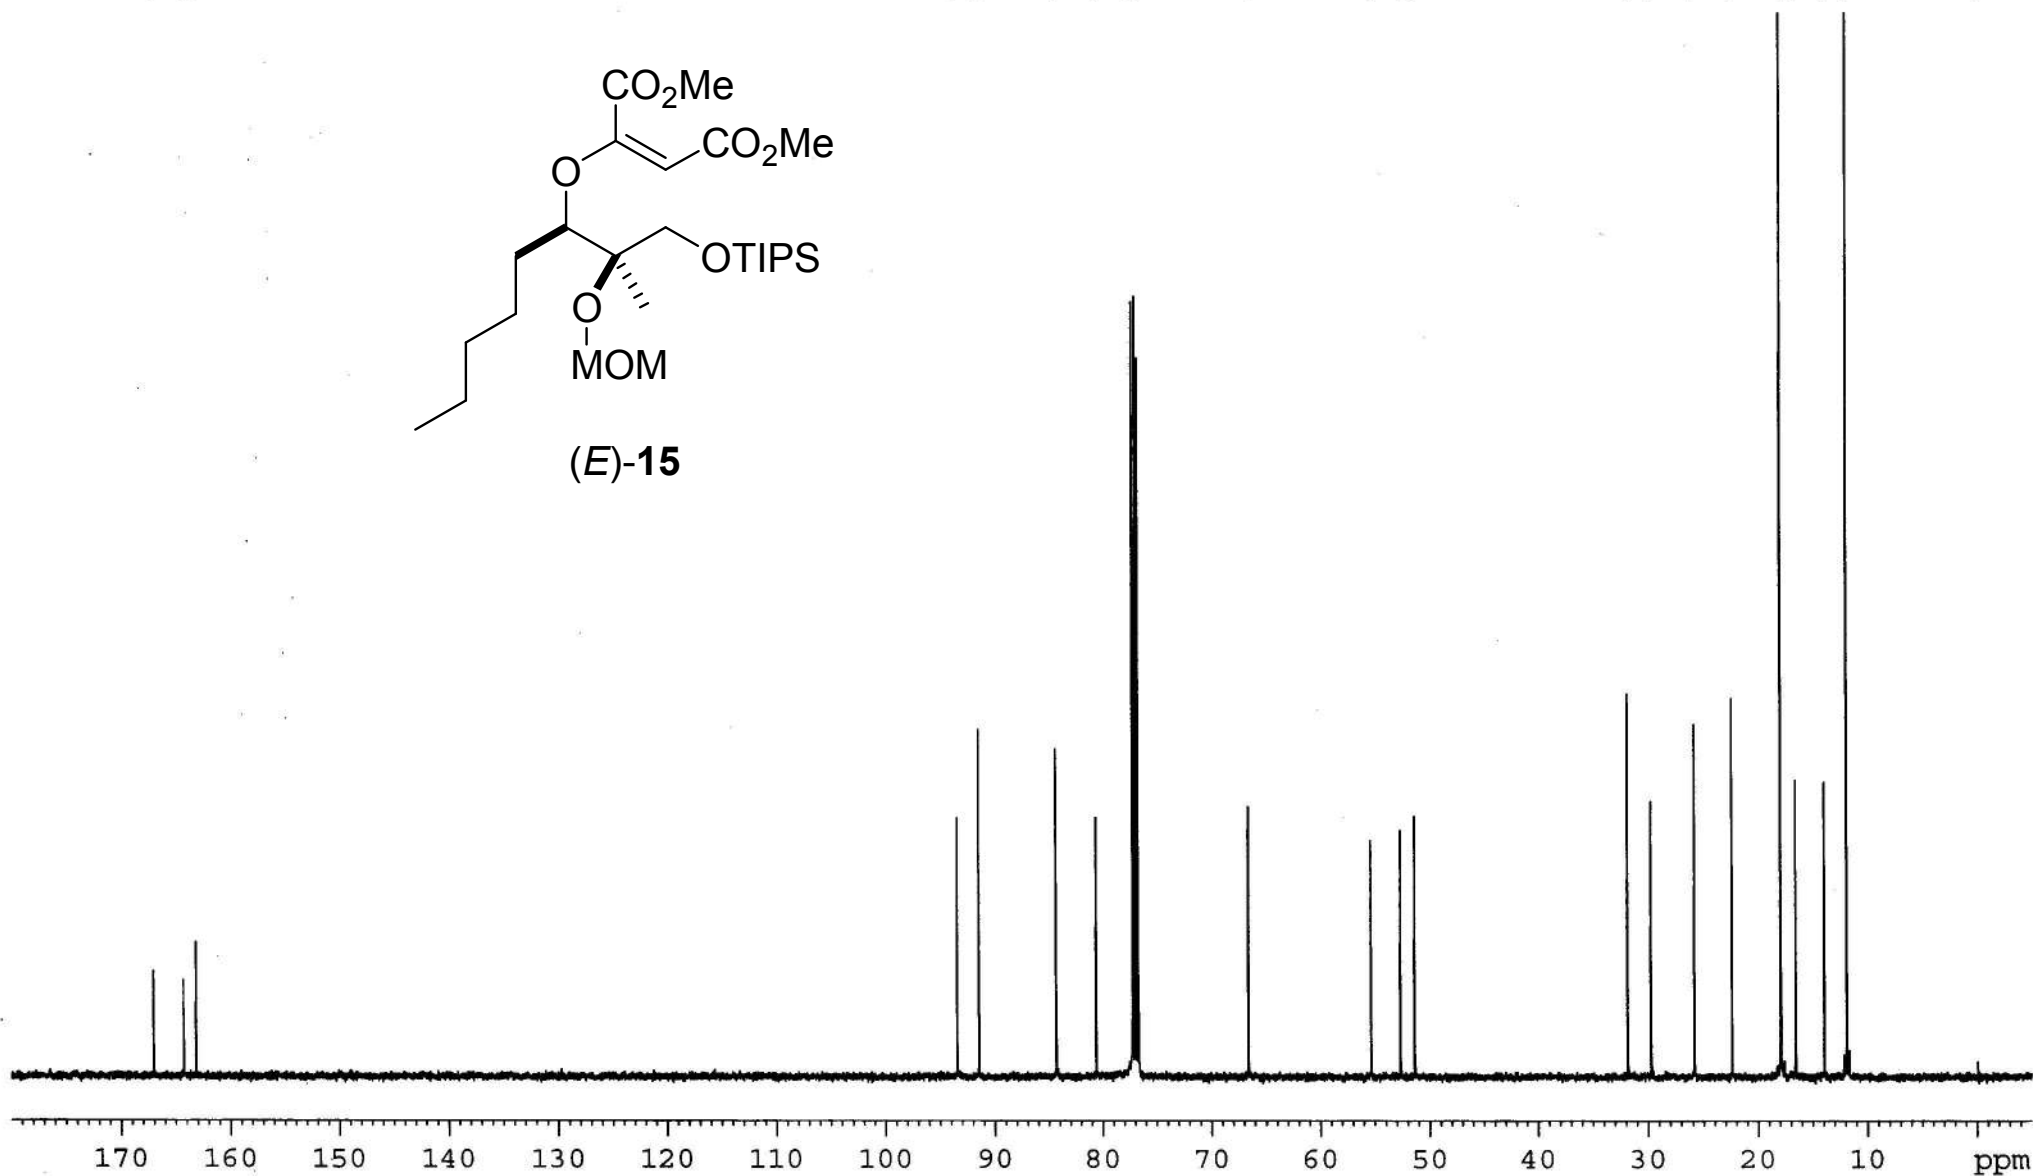

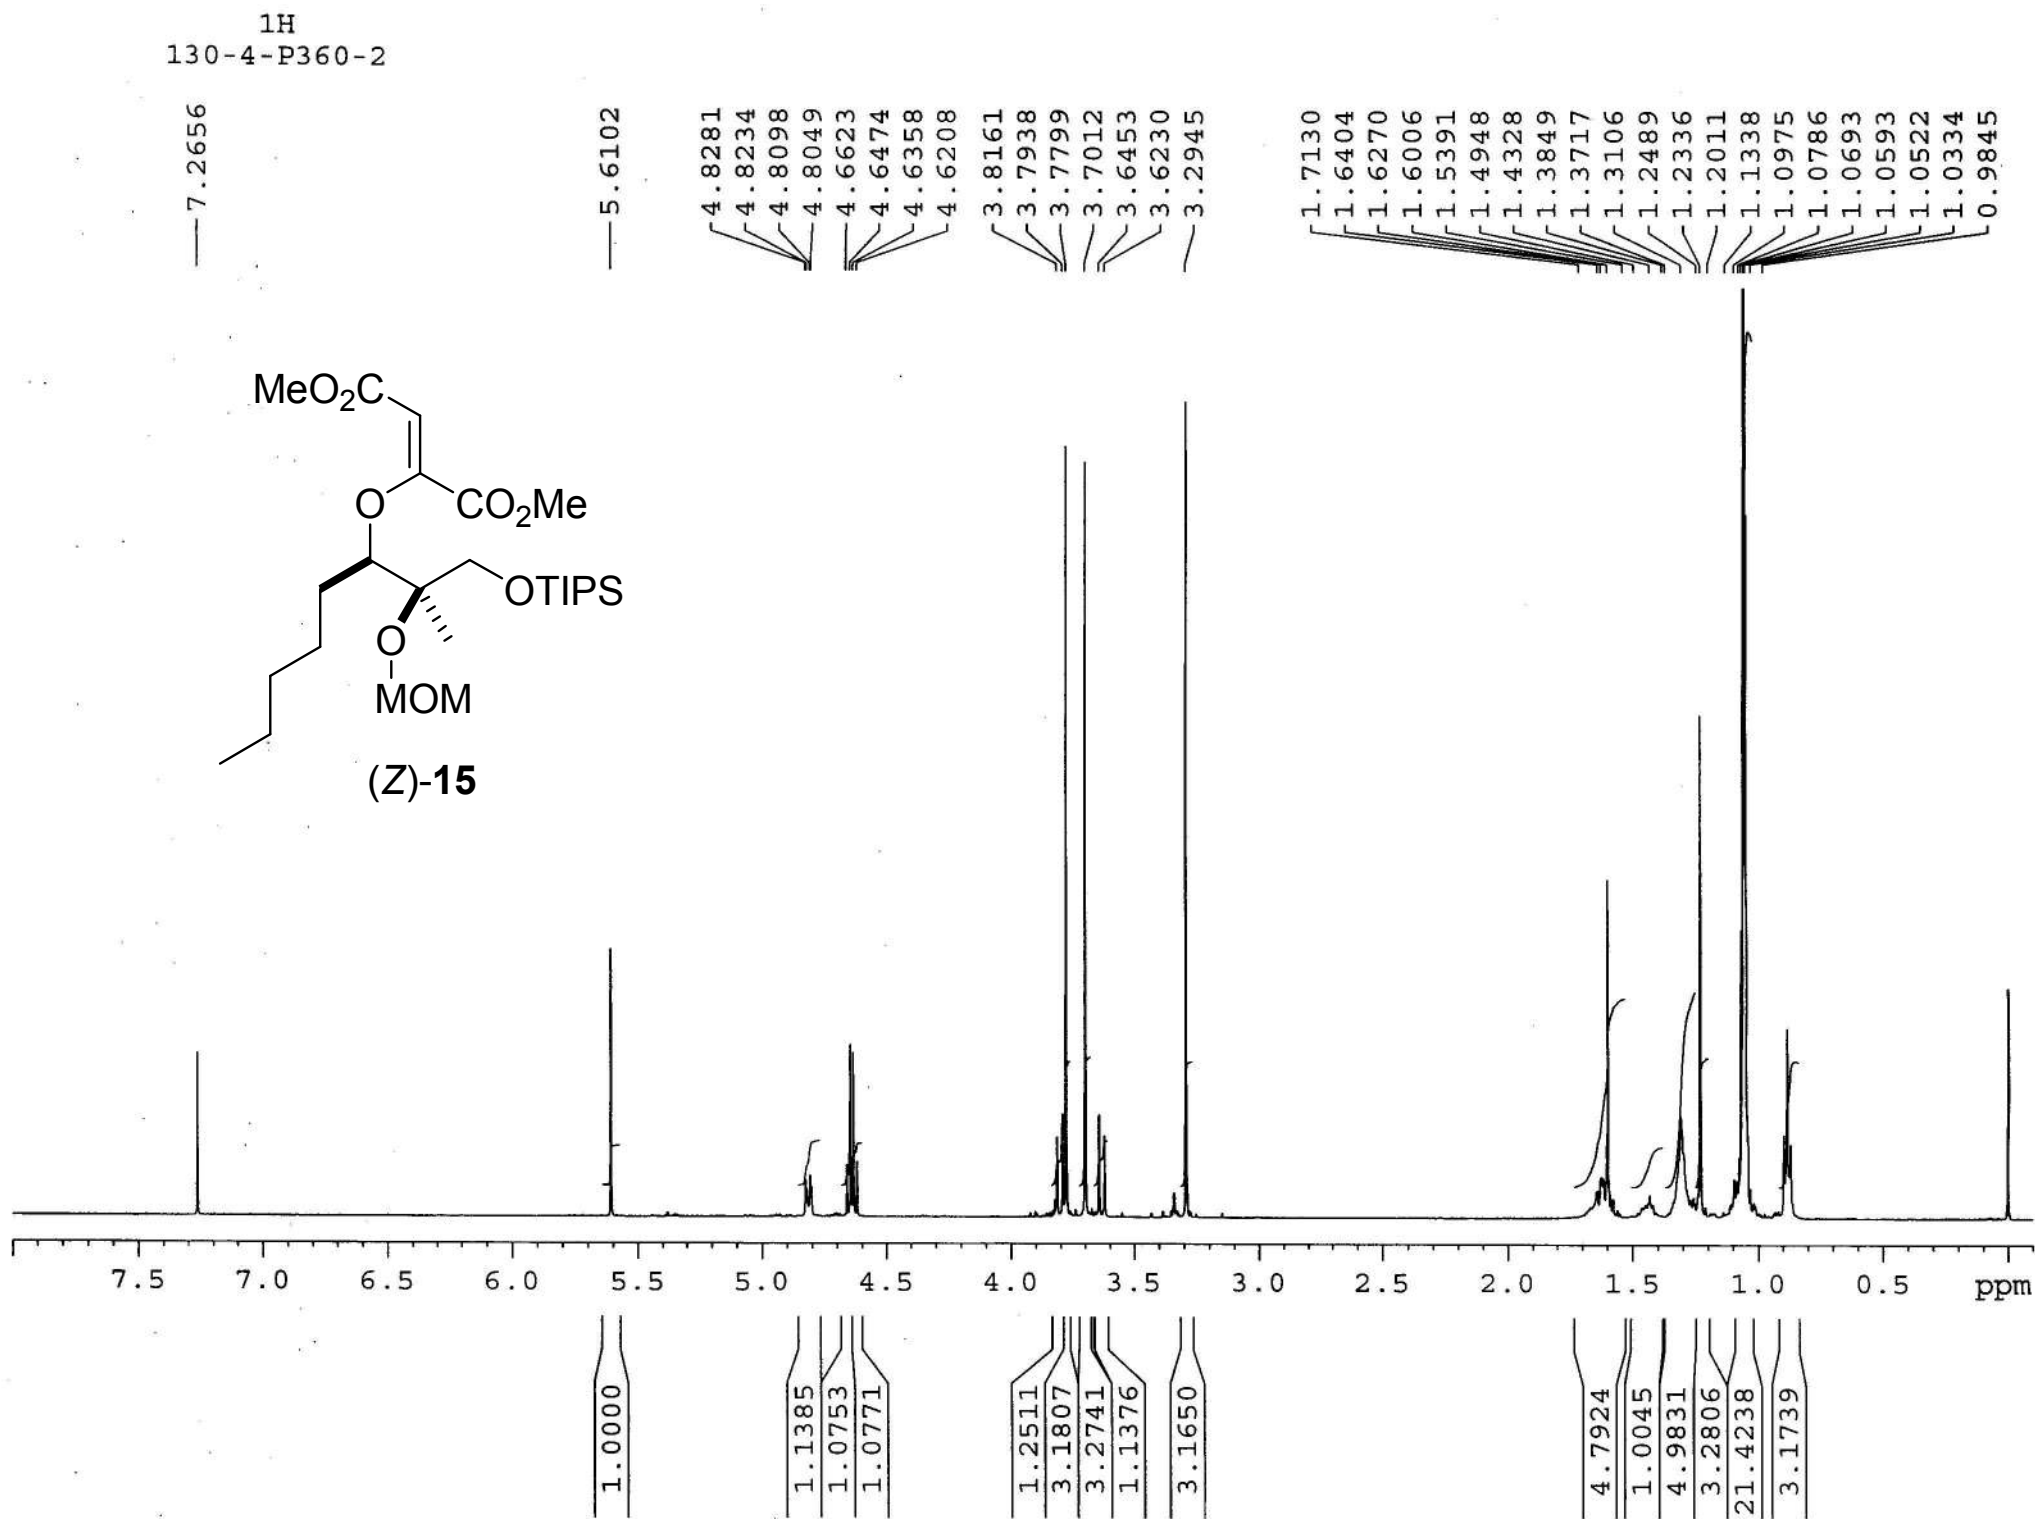

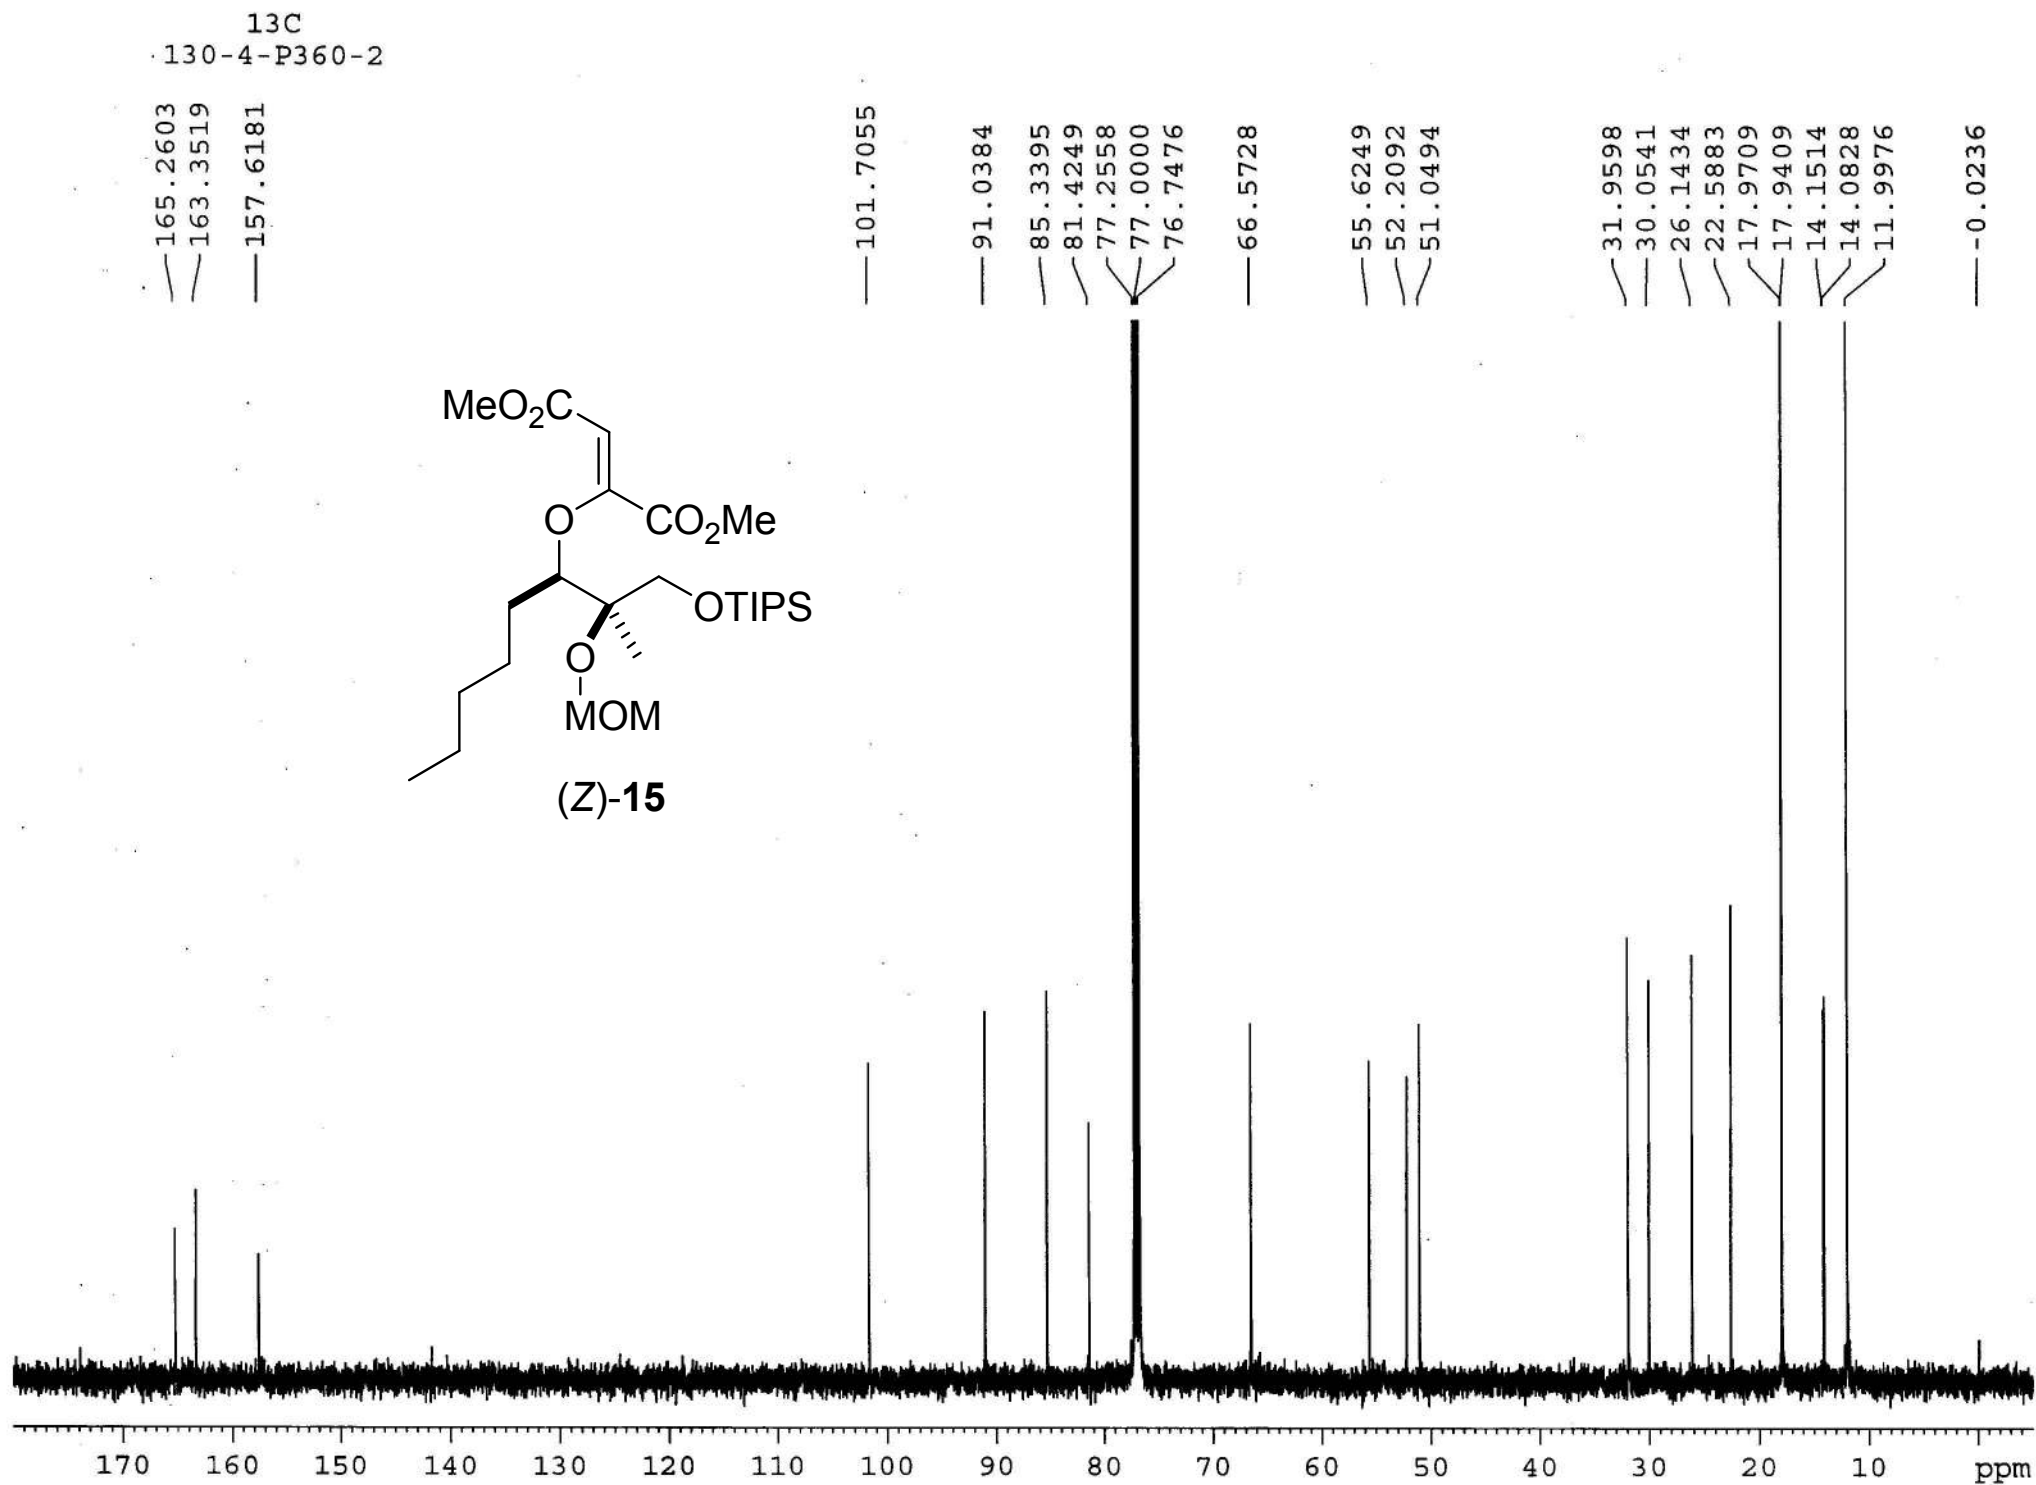

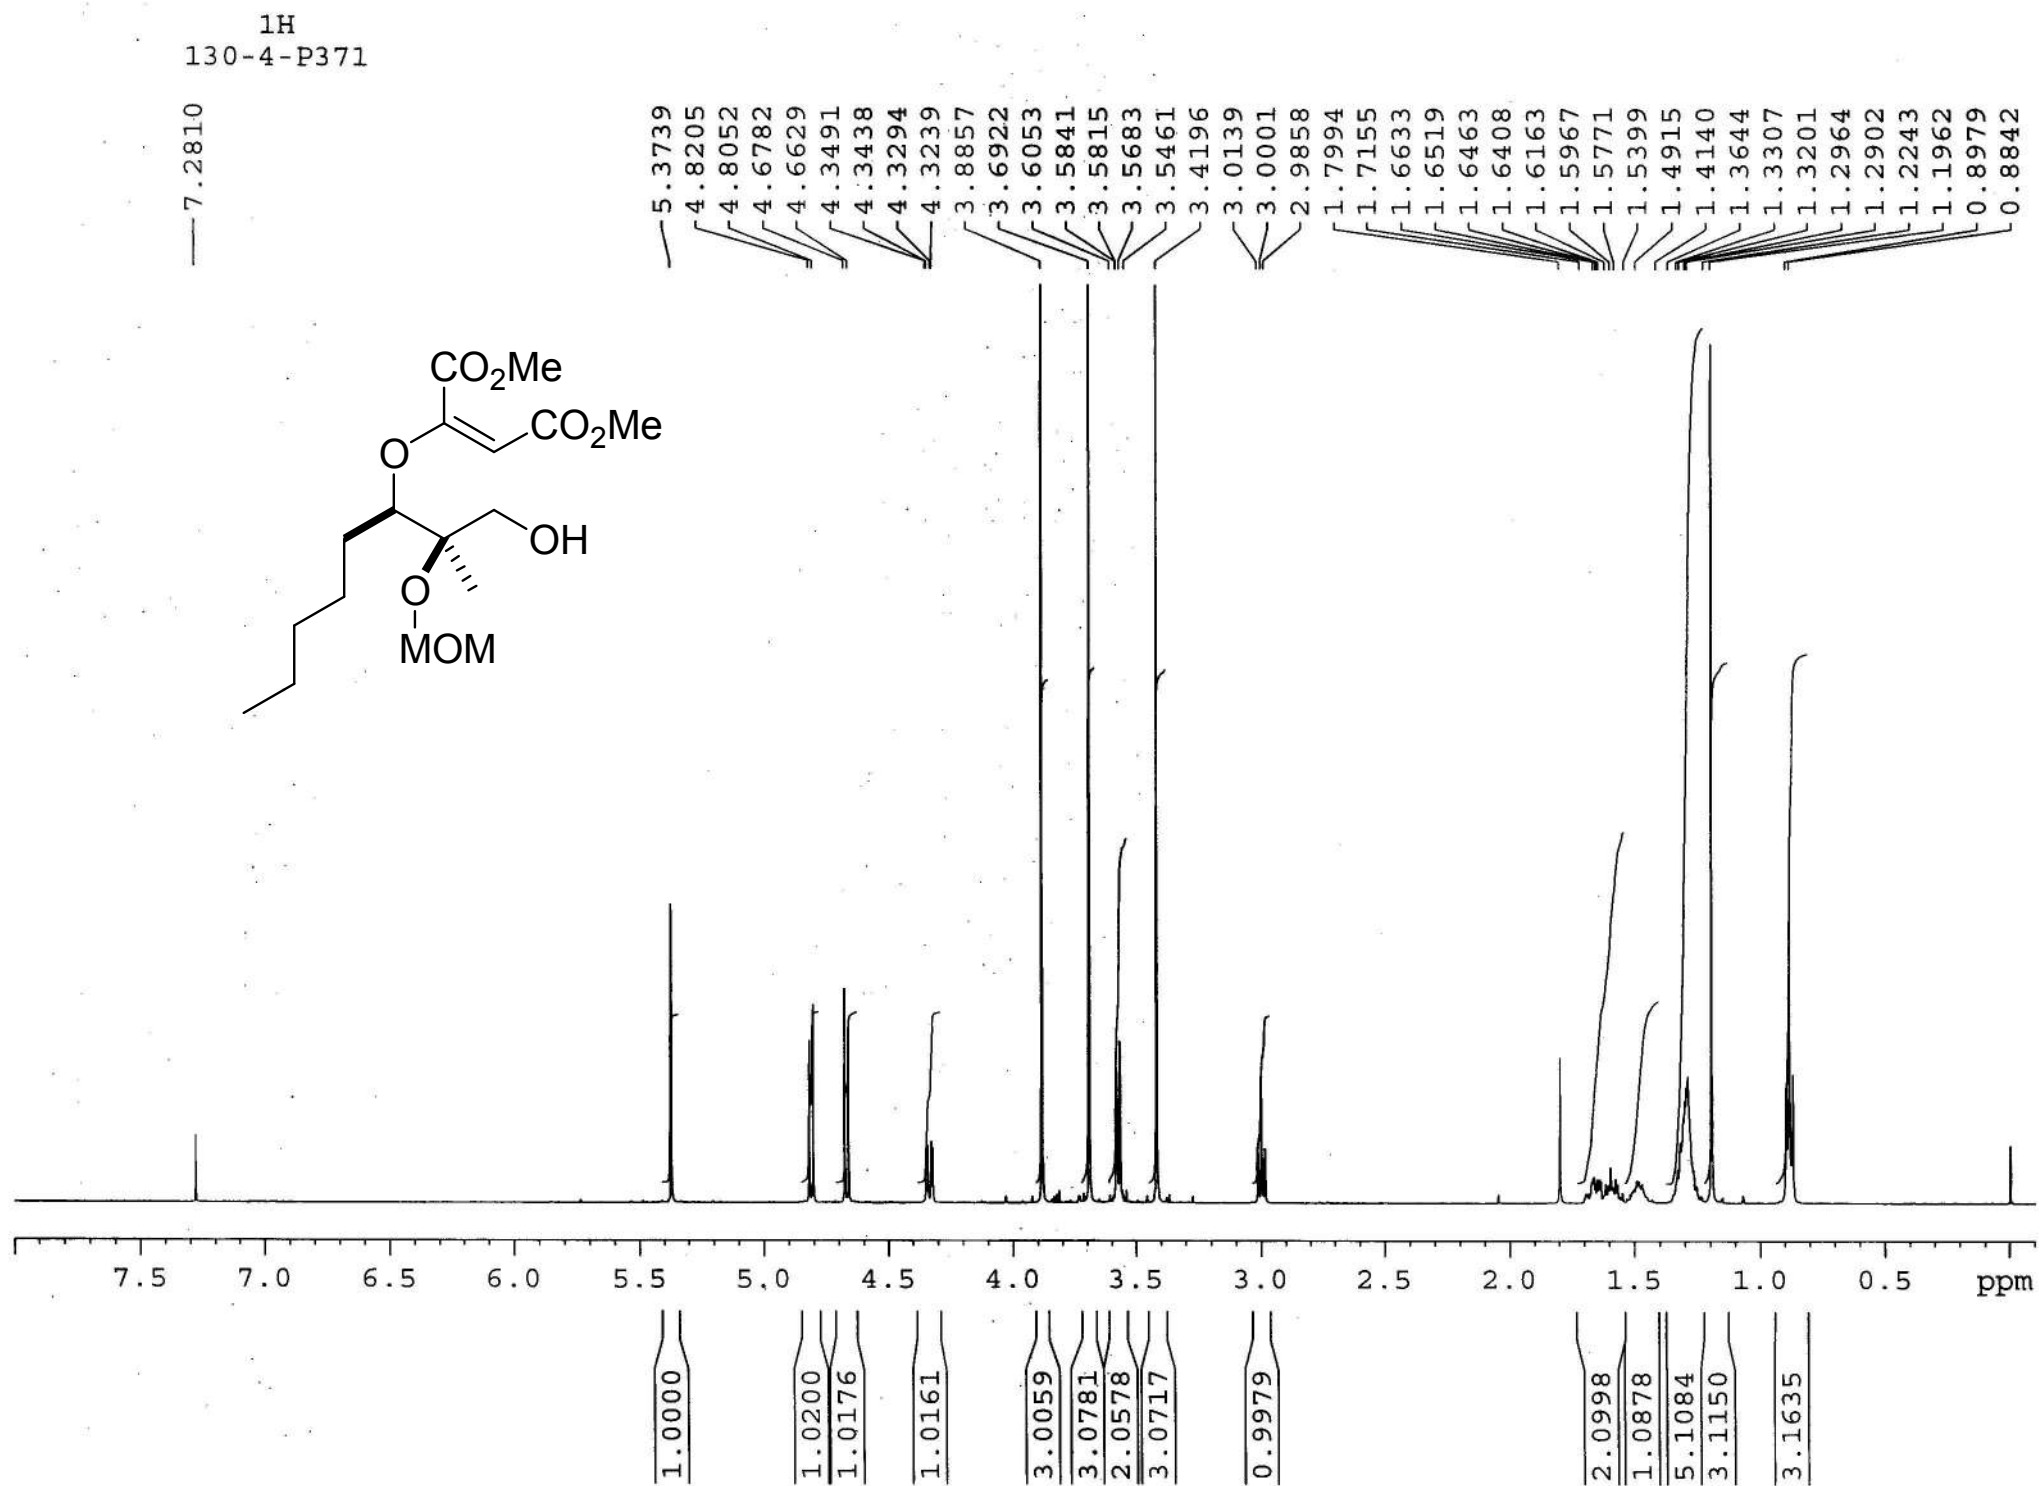

<sup>13</sup>C  
130-4-P371

166.8767  
164.1986  
162.9919

93.7929  
91.0111  
84.1531  
81.5663  
77.2554  
77.0000  
76.7468

65.4654

55.6653  
52.7777  
51.4496

31.6936  
29.8748  
25.6234  
22.3562  
15.5062  
13.9204

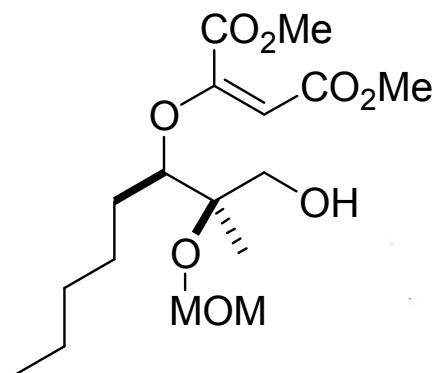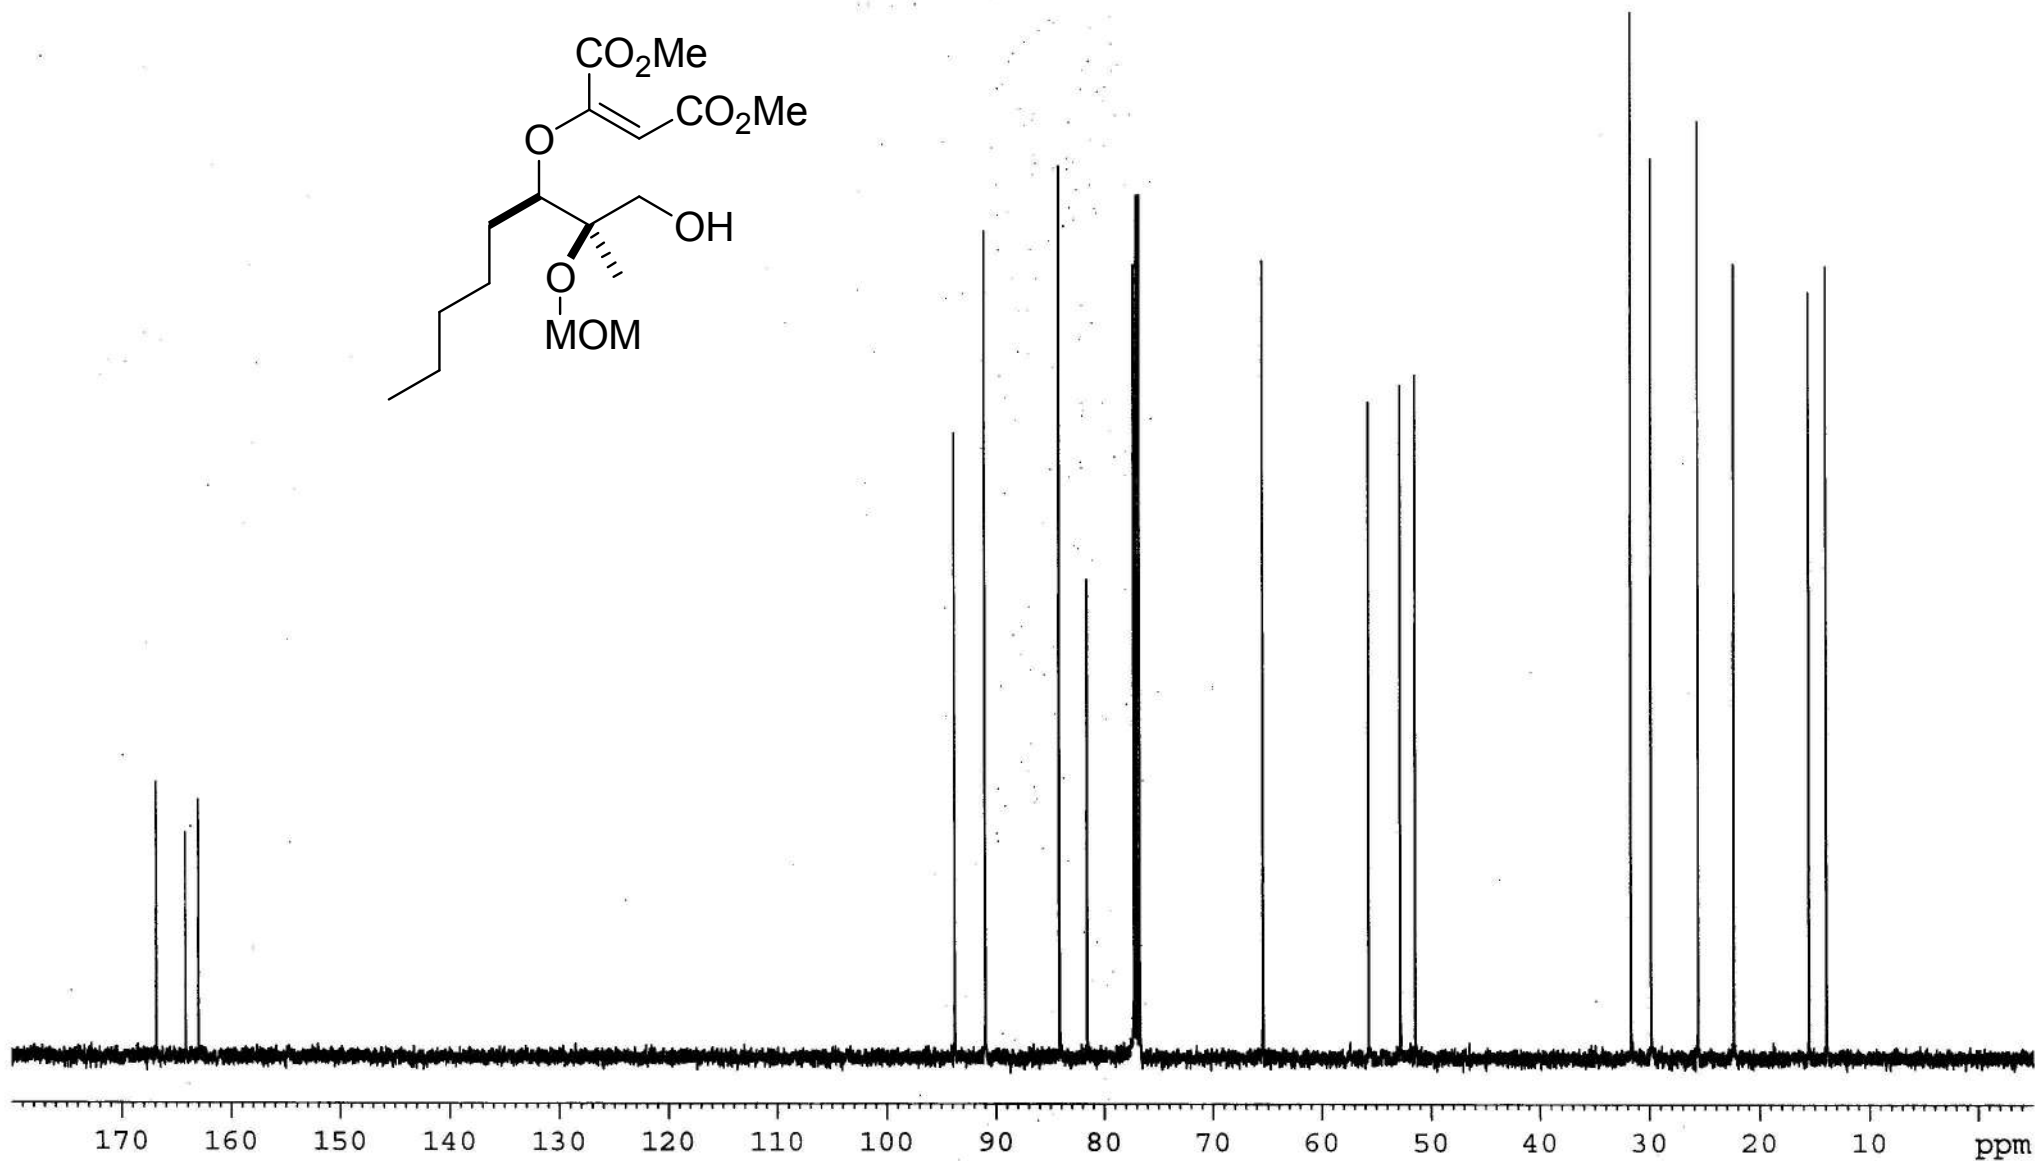

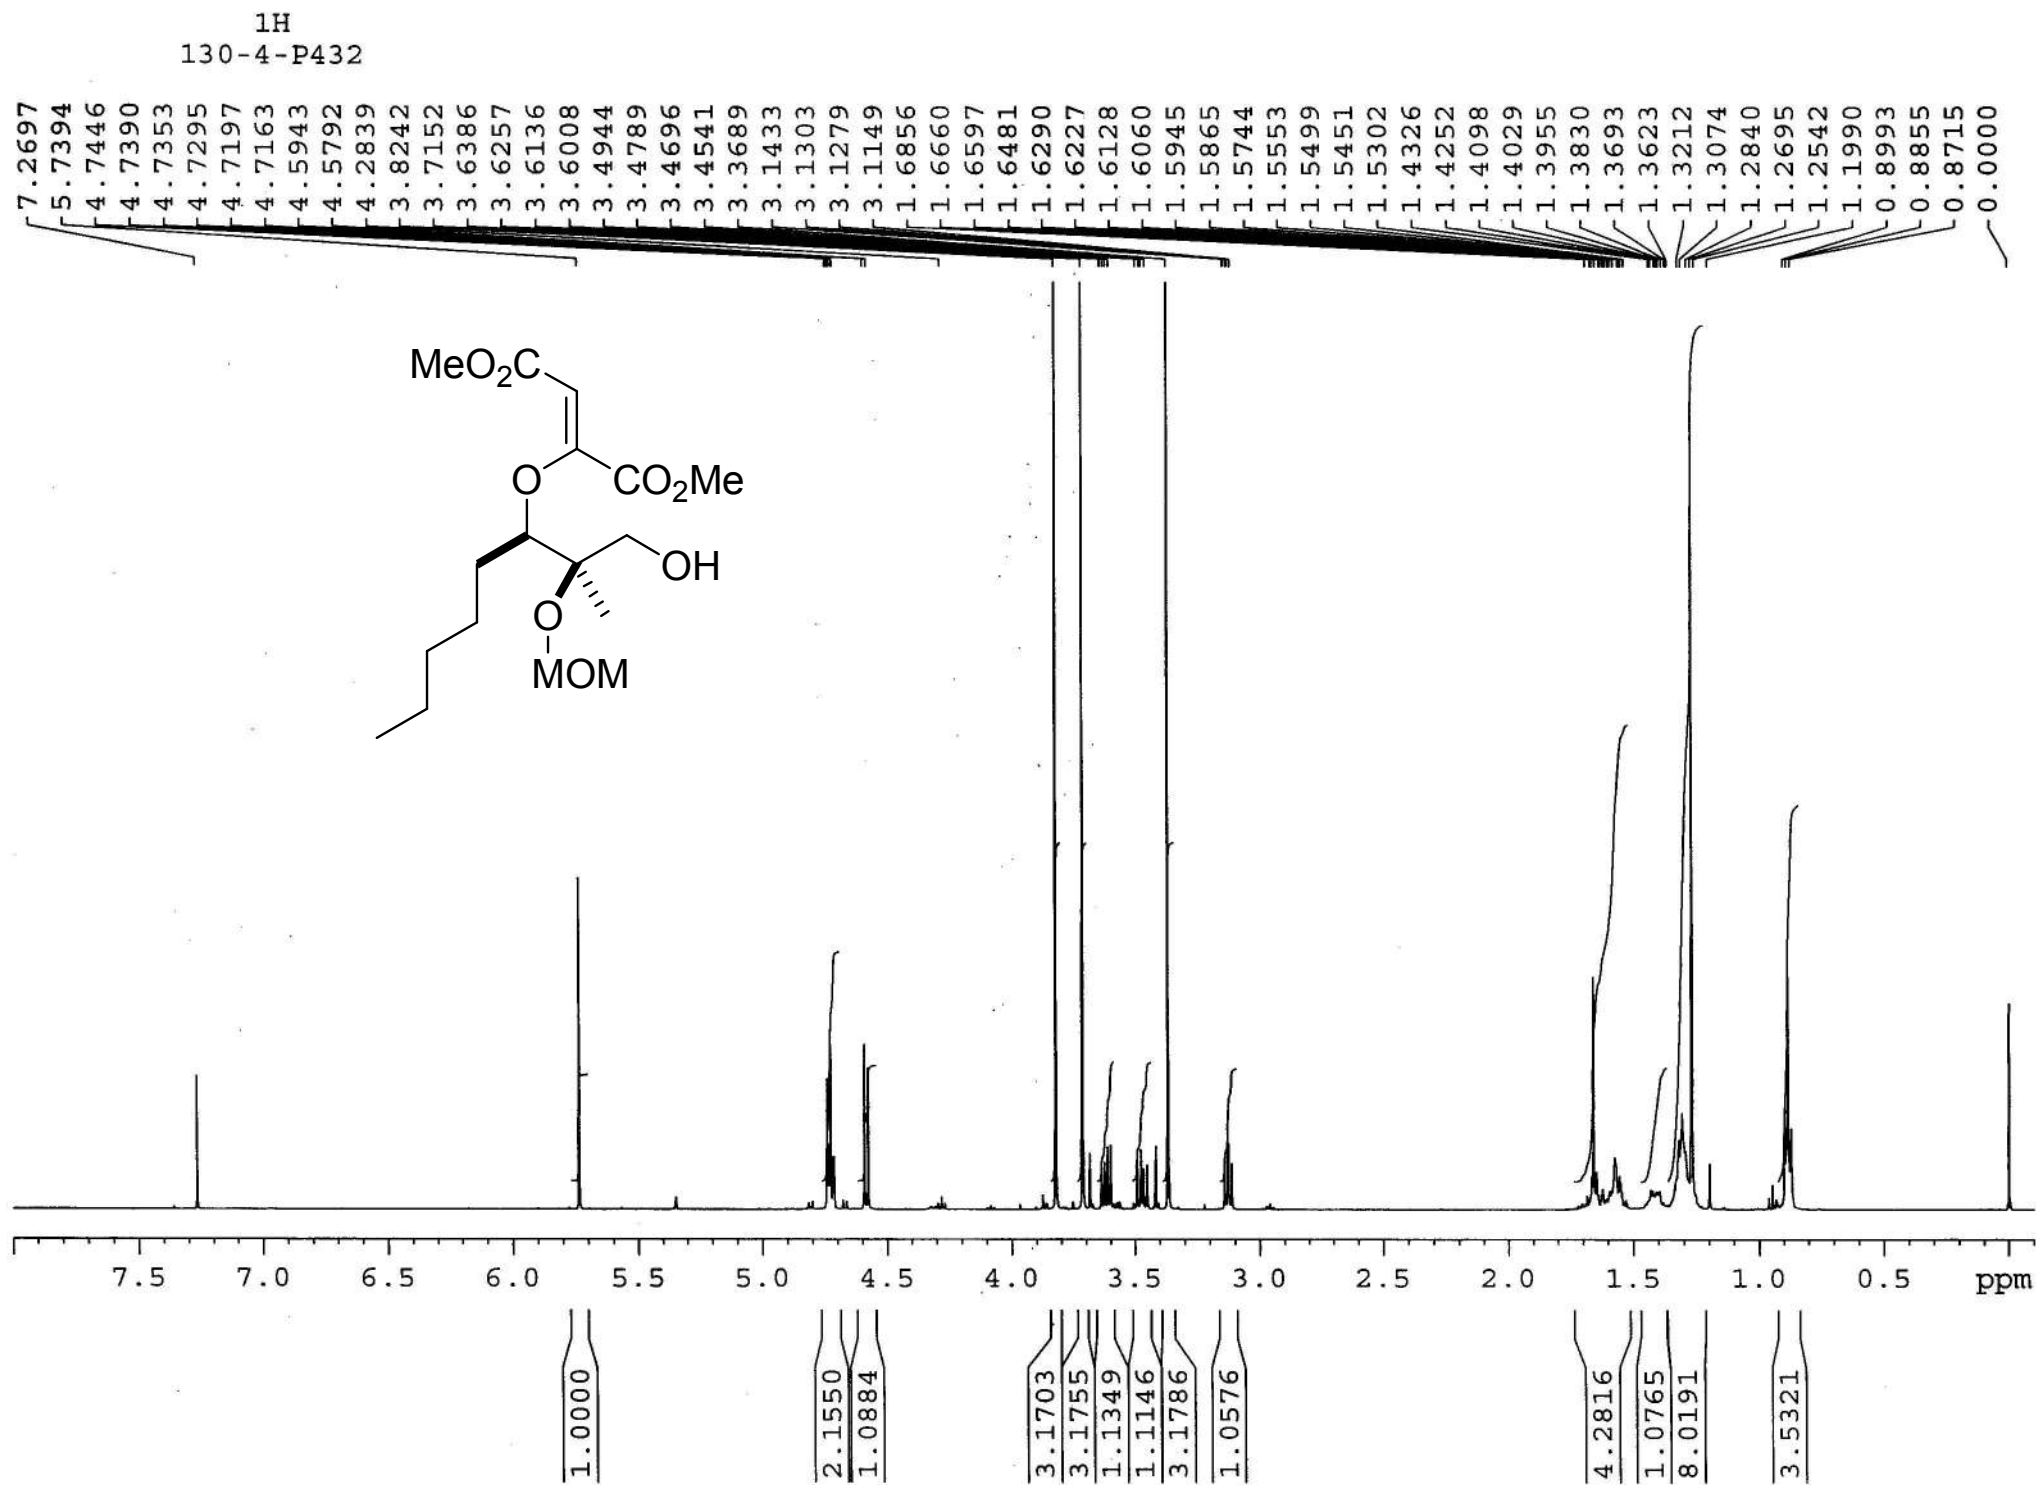

<sup>13</sup>C  
130-4-P432

165.0652  
163.2156  
156.4052

103.7822

90.6944  
84.5901  
82.2082  
77.2551  
77.0000  
76.7473

65.8570

55.6201  
52.4709  
51.2546

31.7248  
30.2556  
26.0707  
22.5004

14.5009  
14.0238

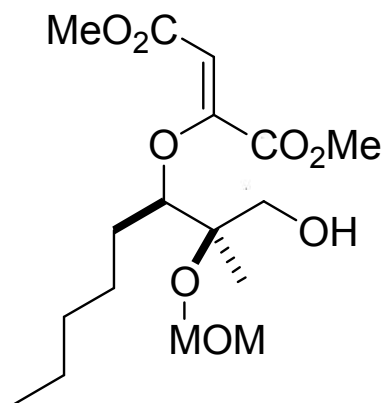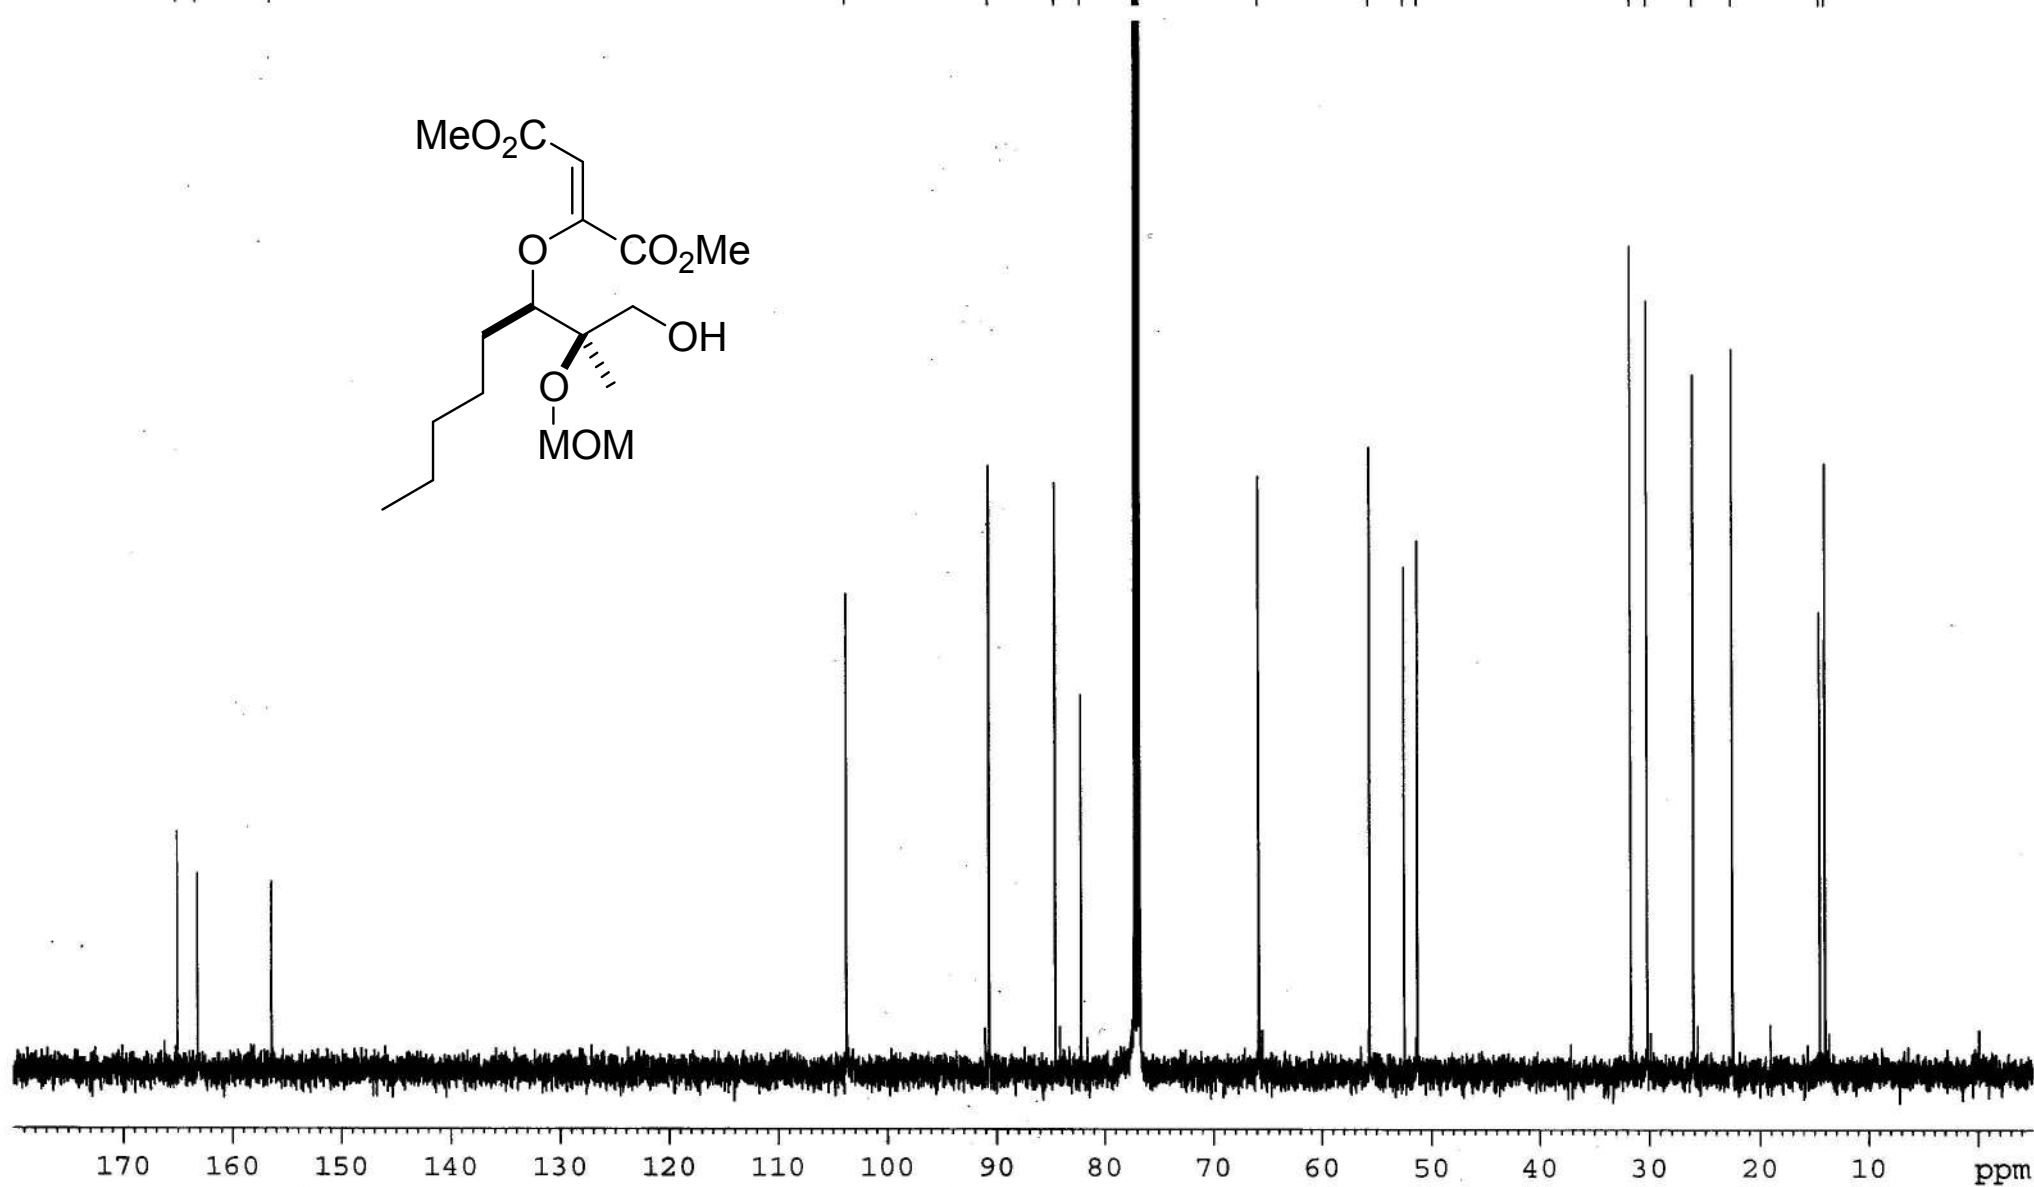

<sup>1</sup>H  
130-4-P381

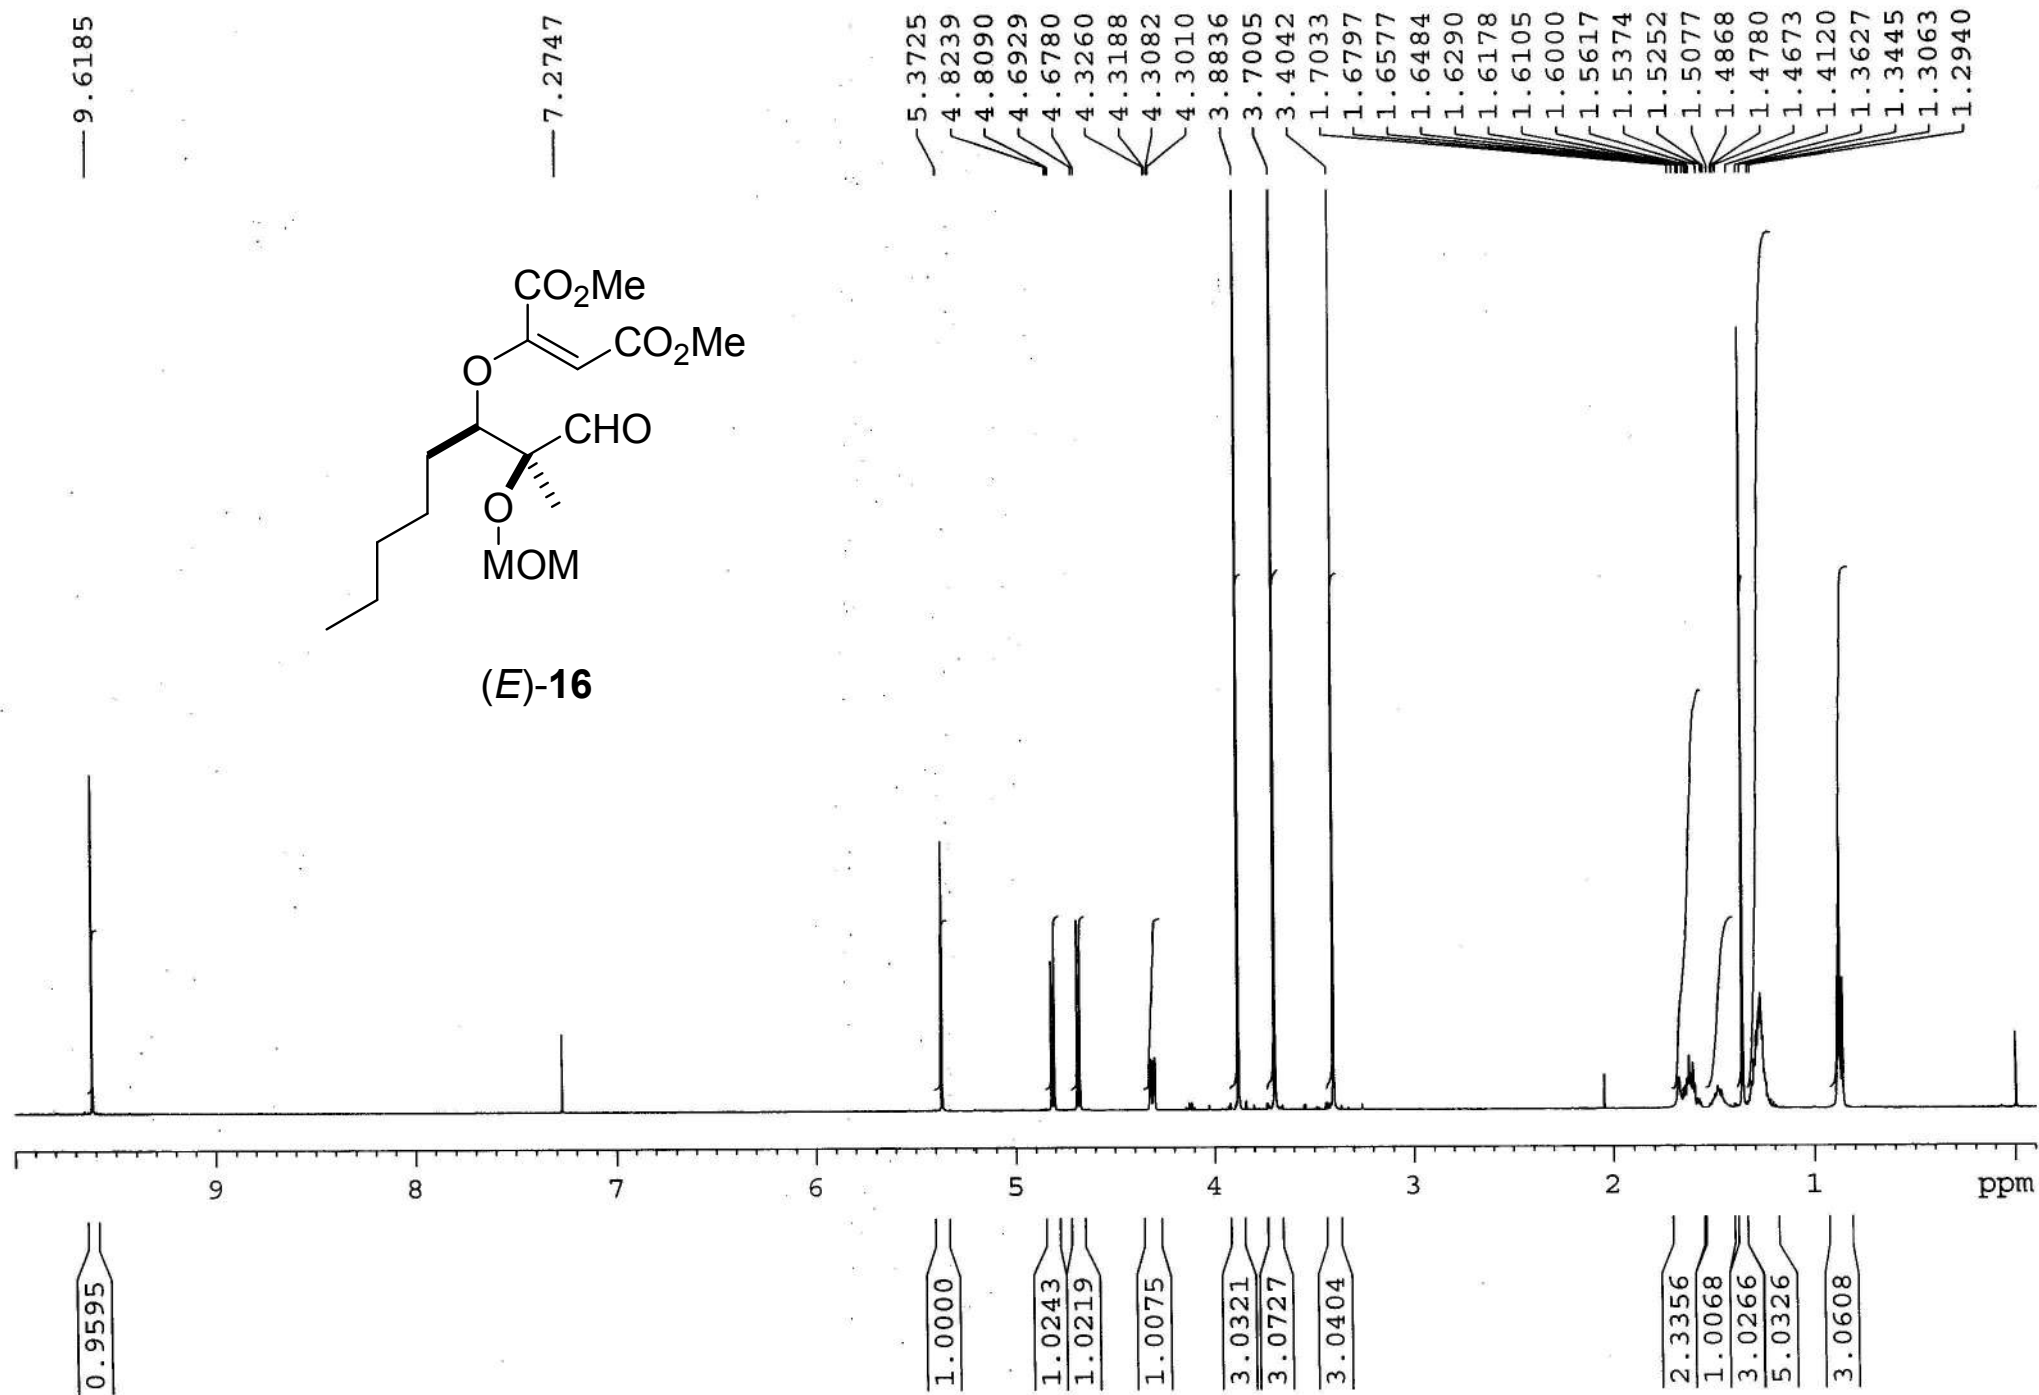

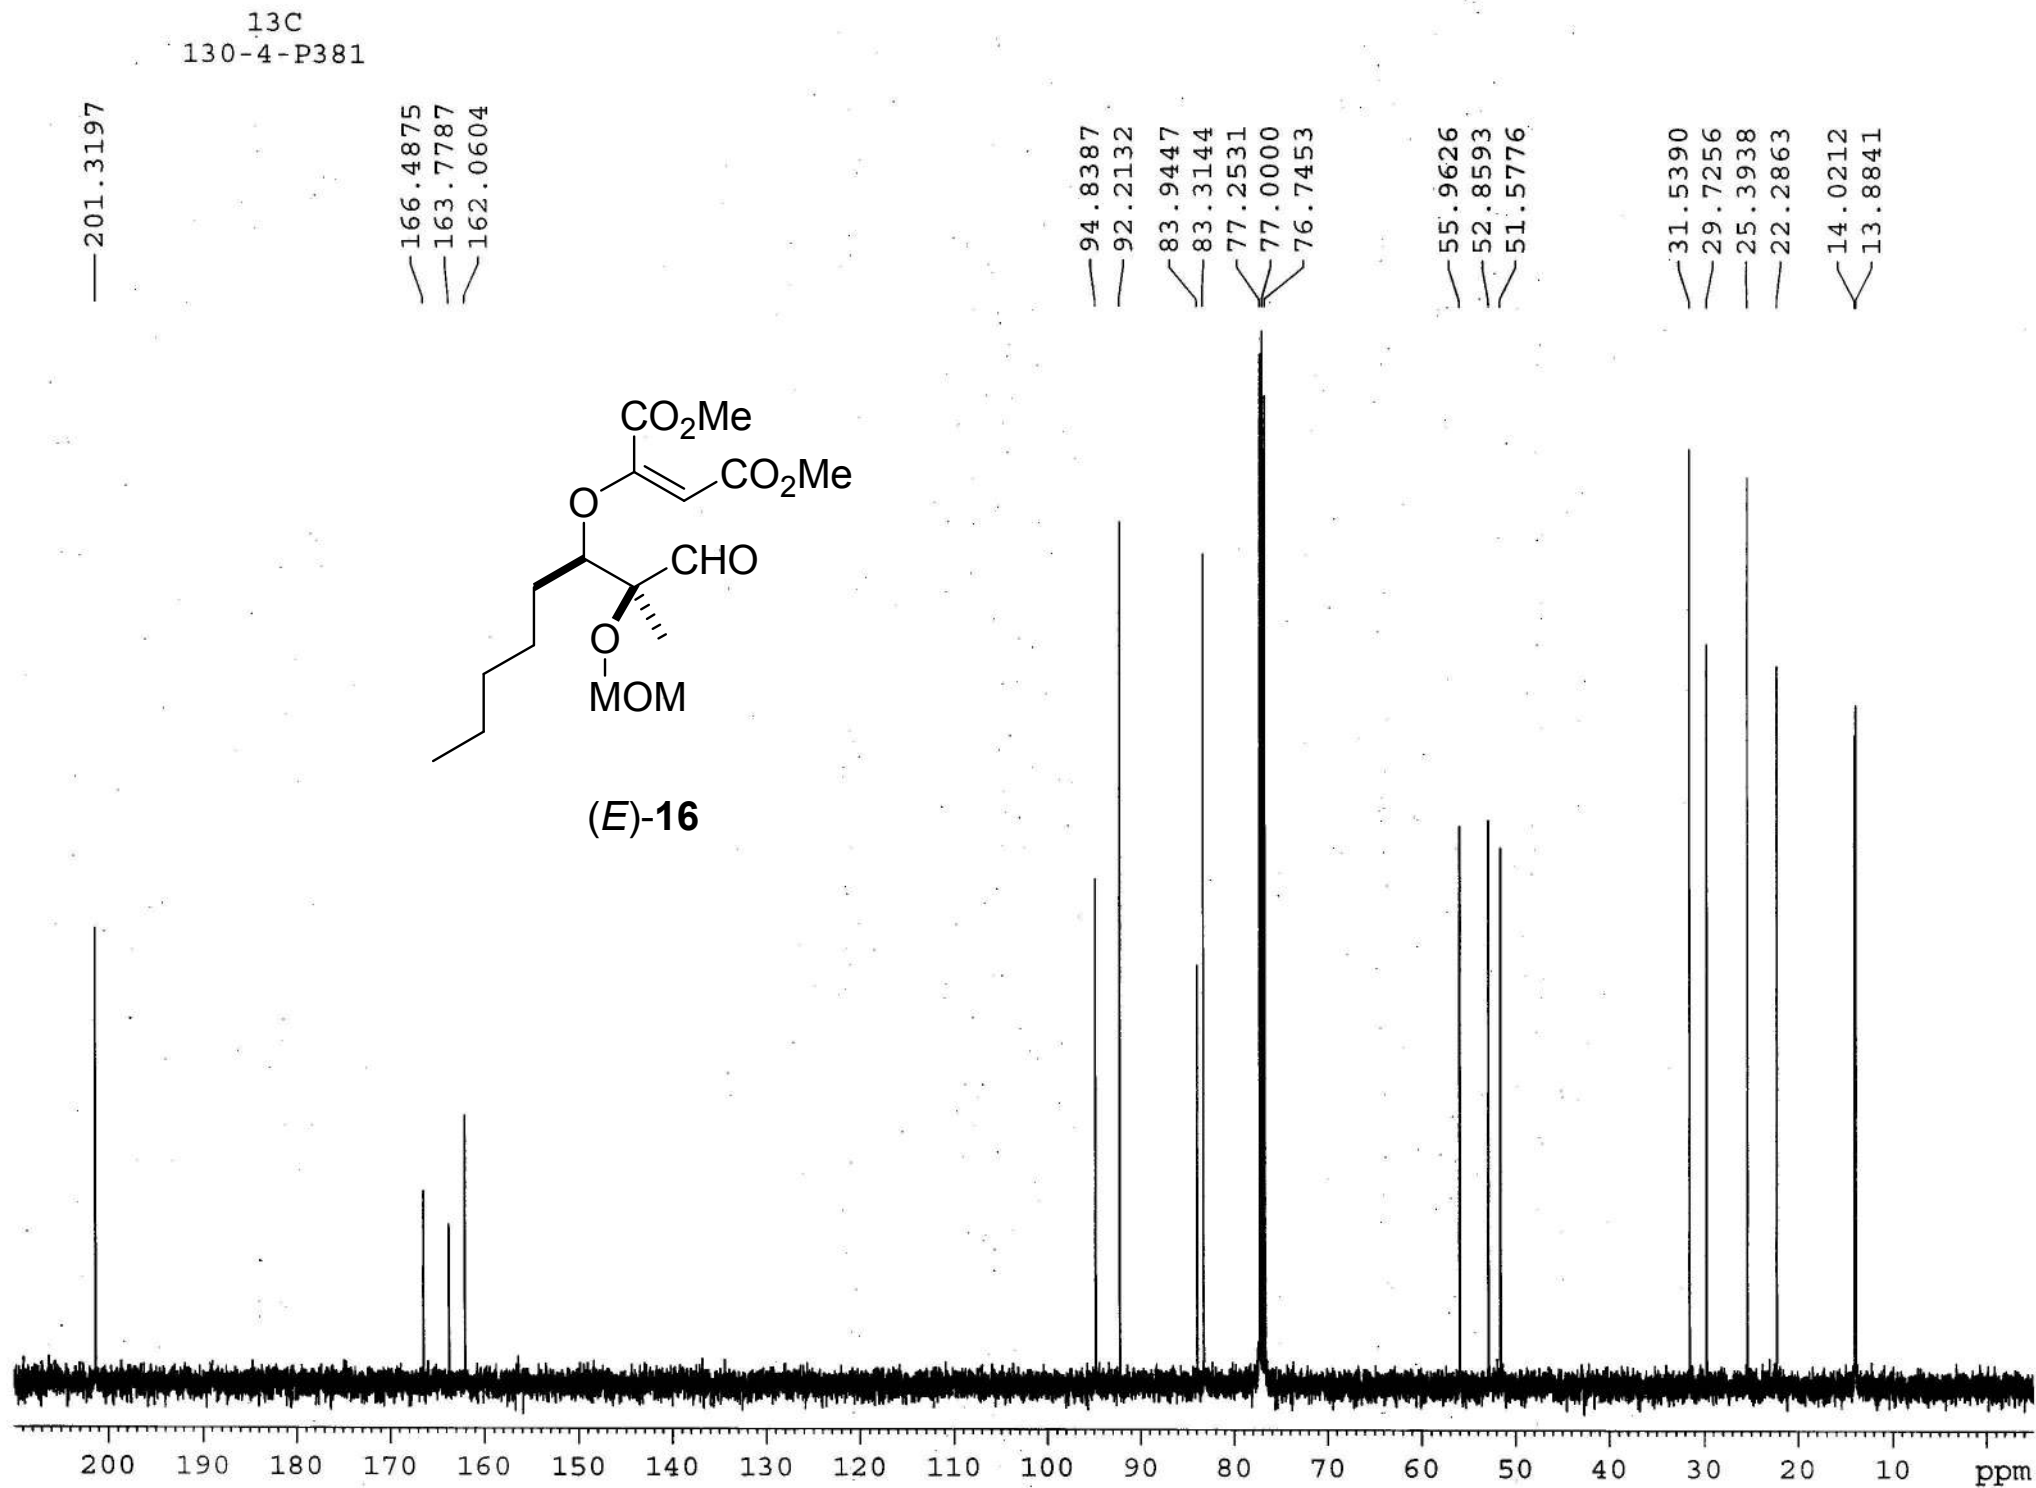

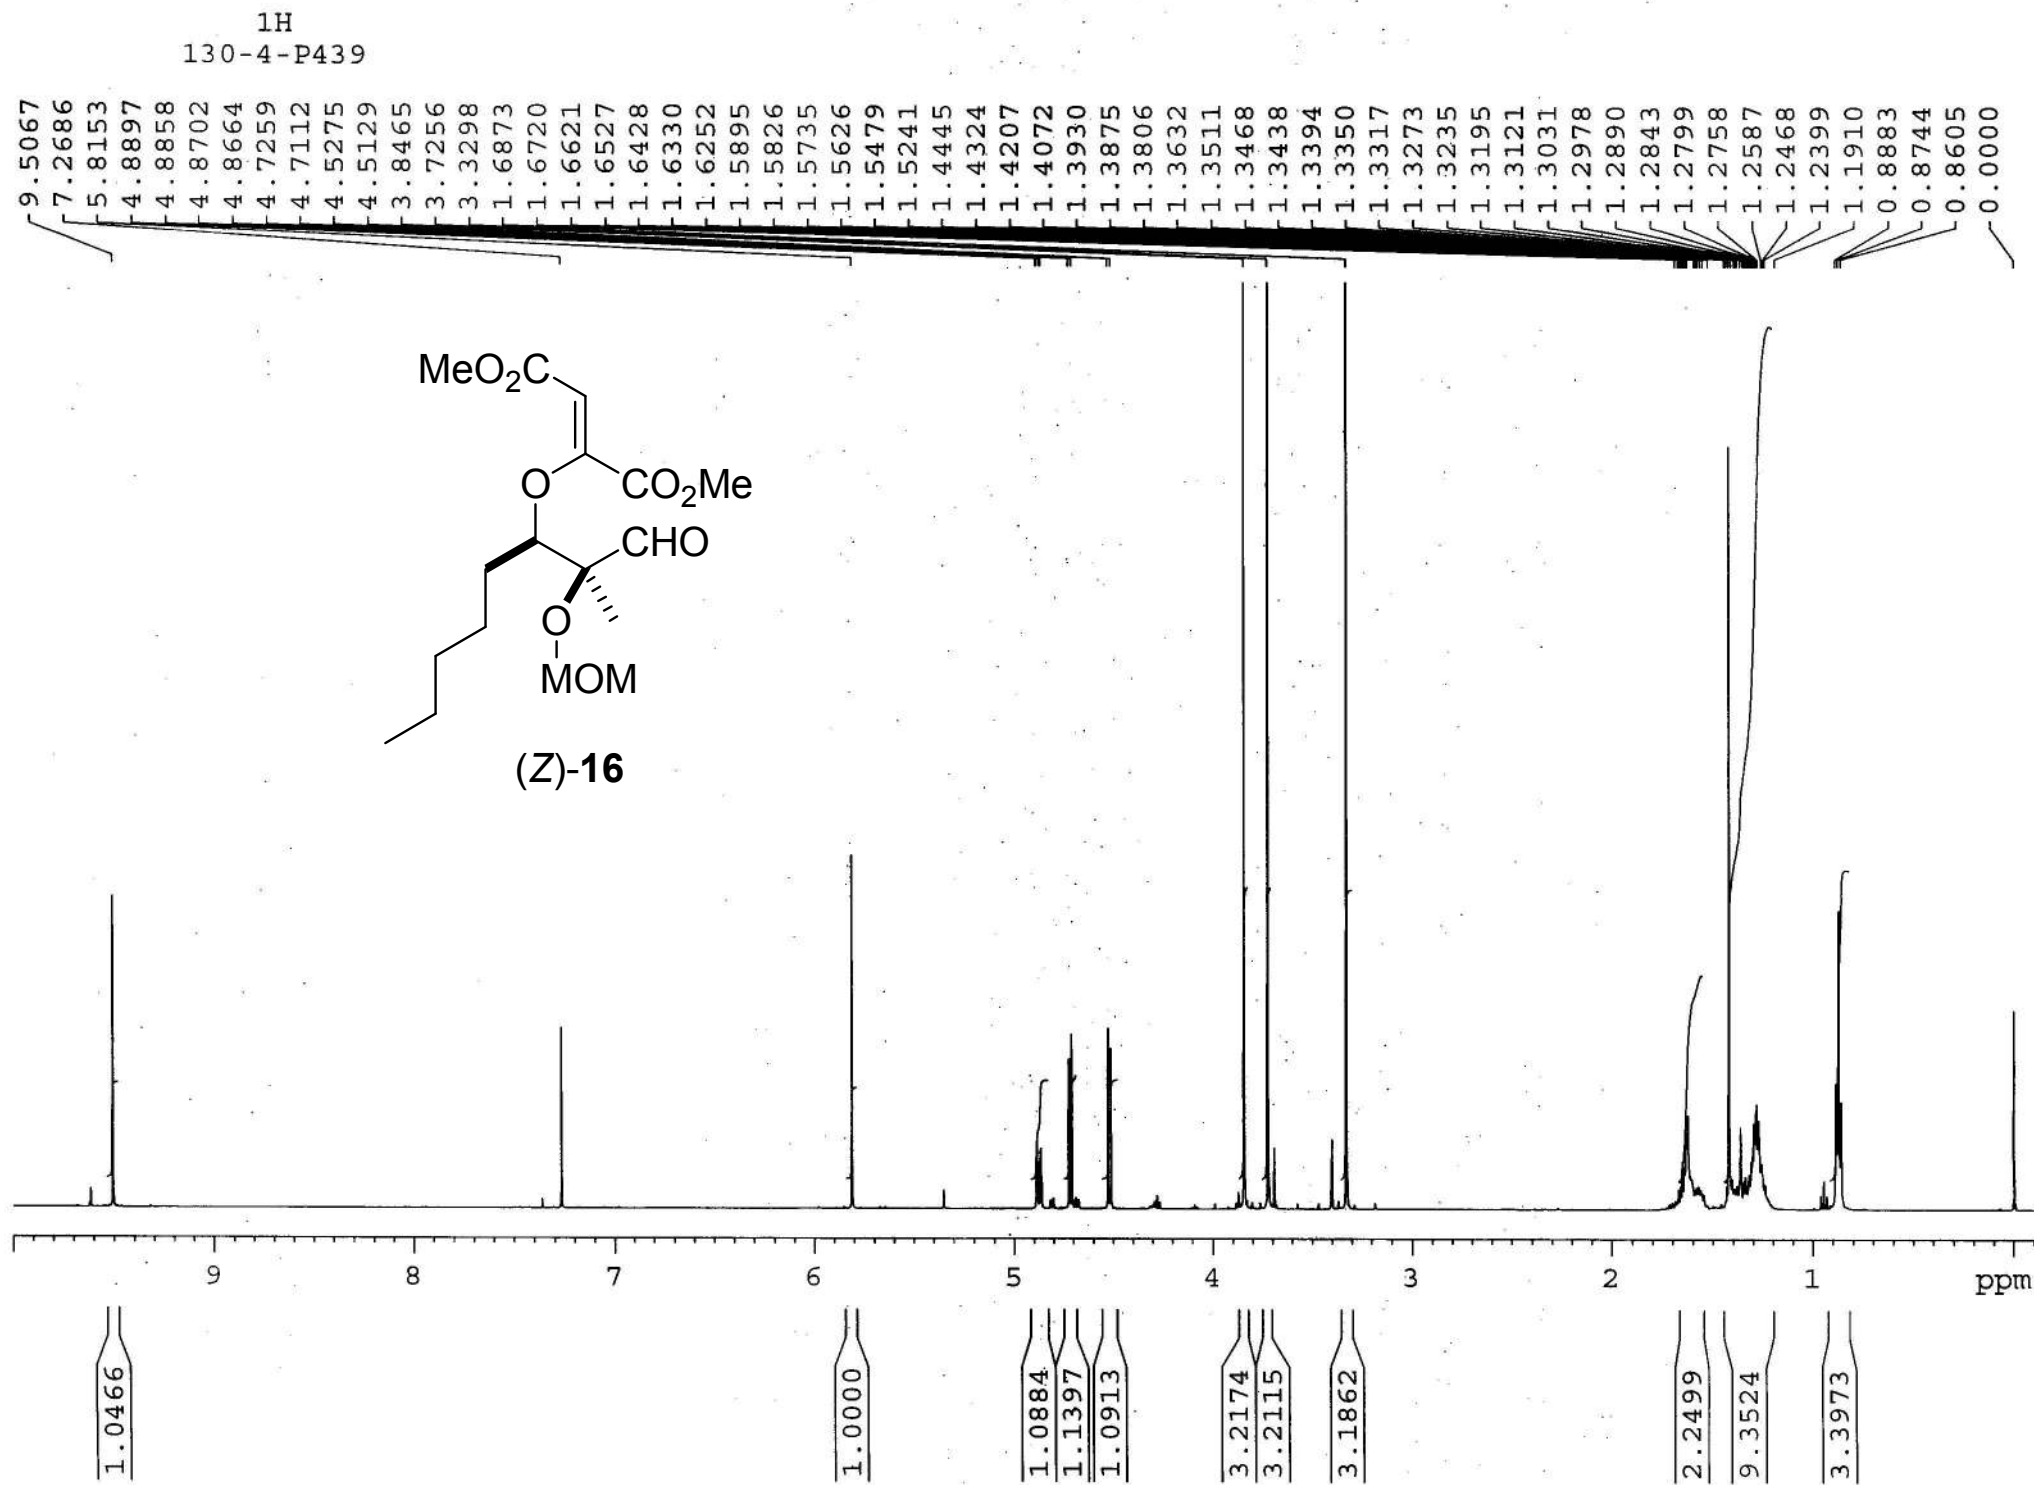

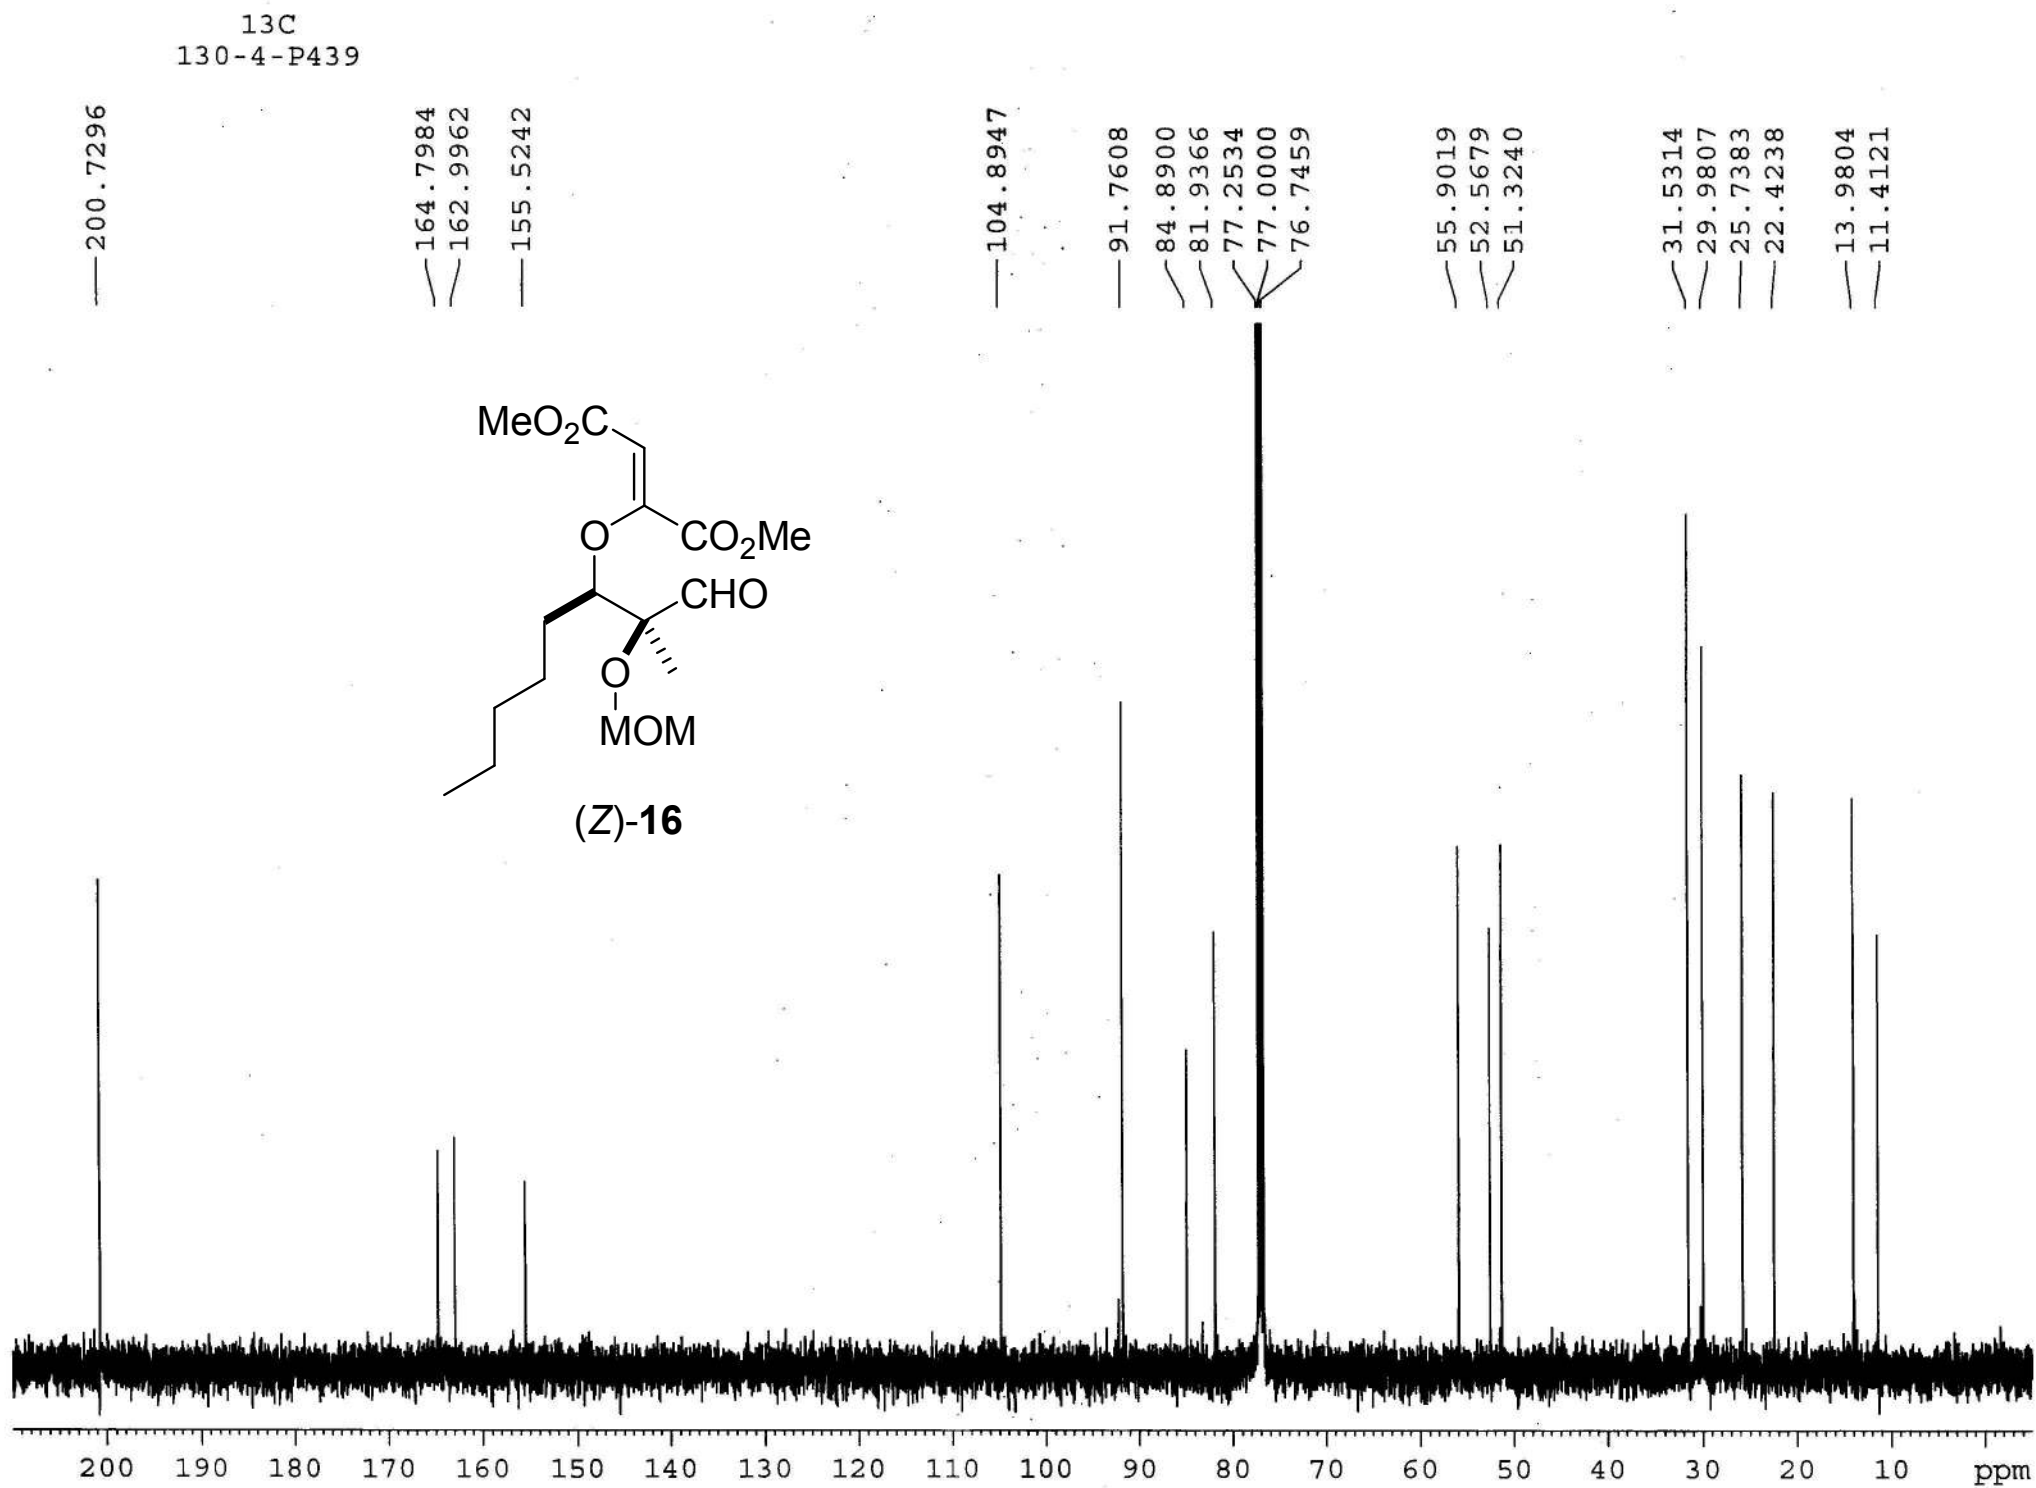

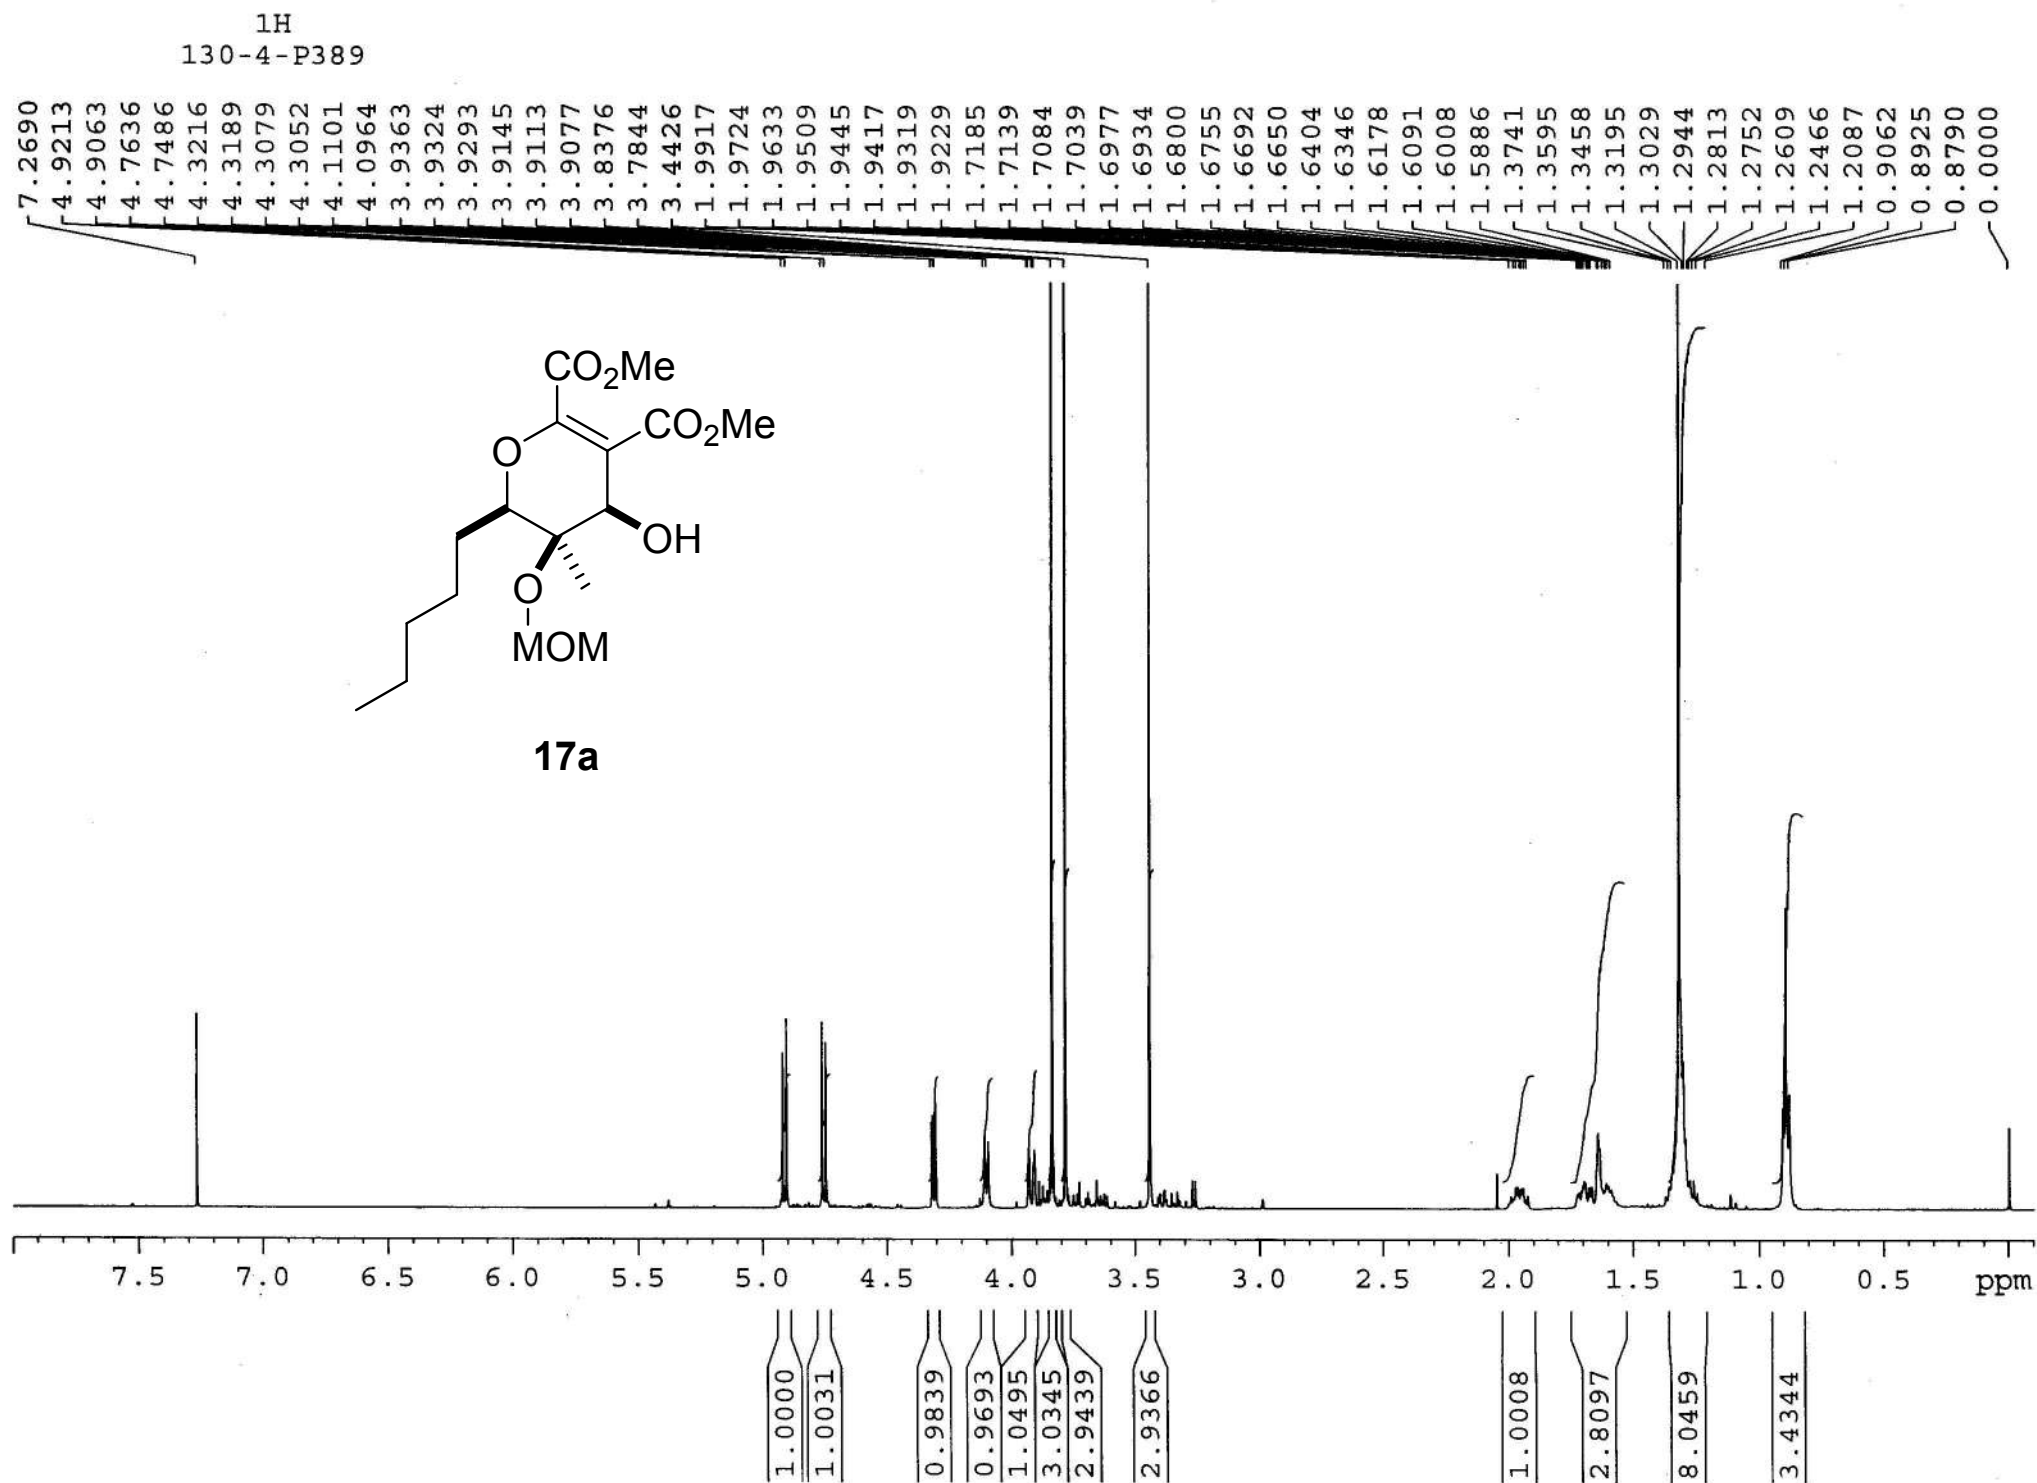

<sup>13</sup>C  
130-4-P389

—166.5961  
—163.1453

—149.1750

—110.4561

—91.3895

—83.2828

—77.2564

—77.0000

—76.7479

—74.4022

—68.4002

—56.0270

—52.7205

—52.1442

—31.5368

—27.1677

—25.8560

—22.5171

—18.6494

—14.0036

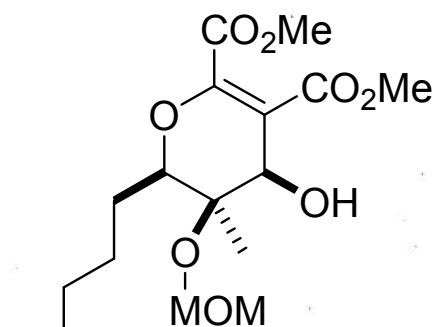

**17a**

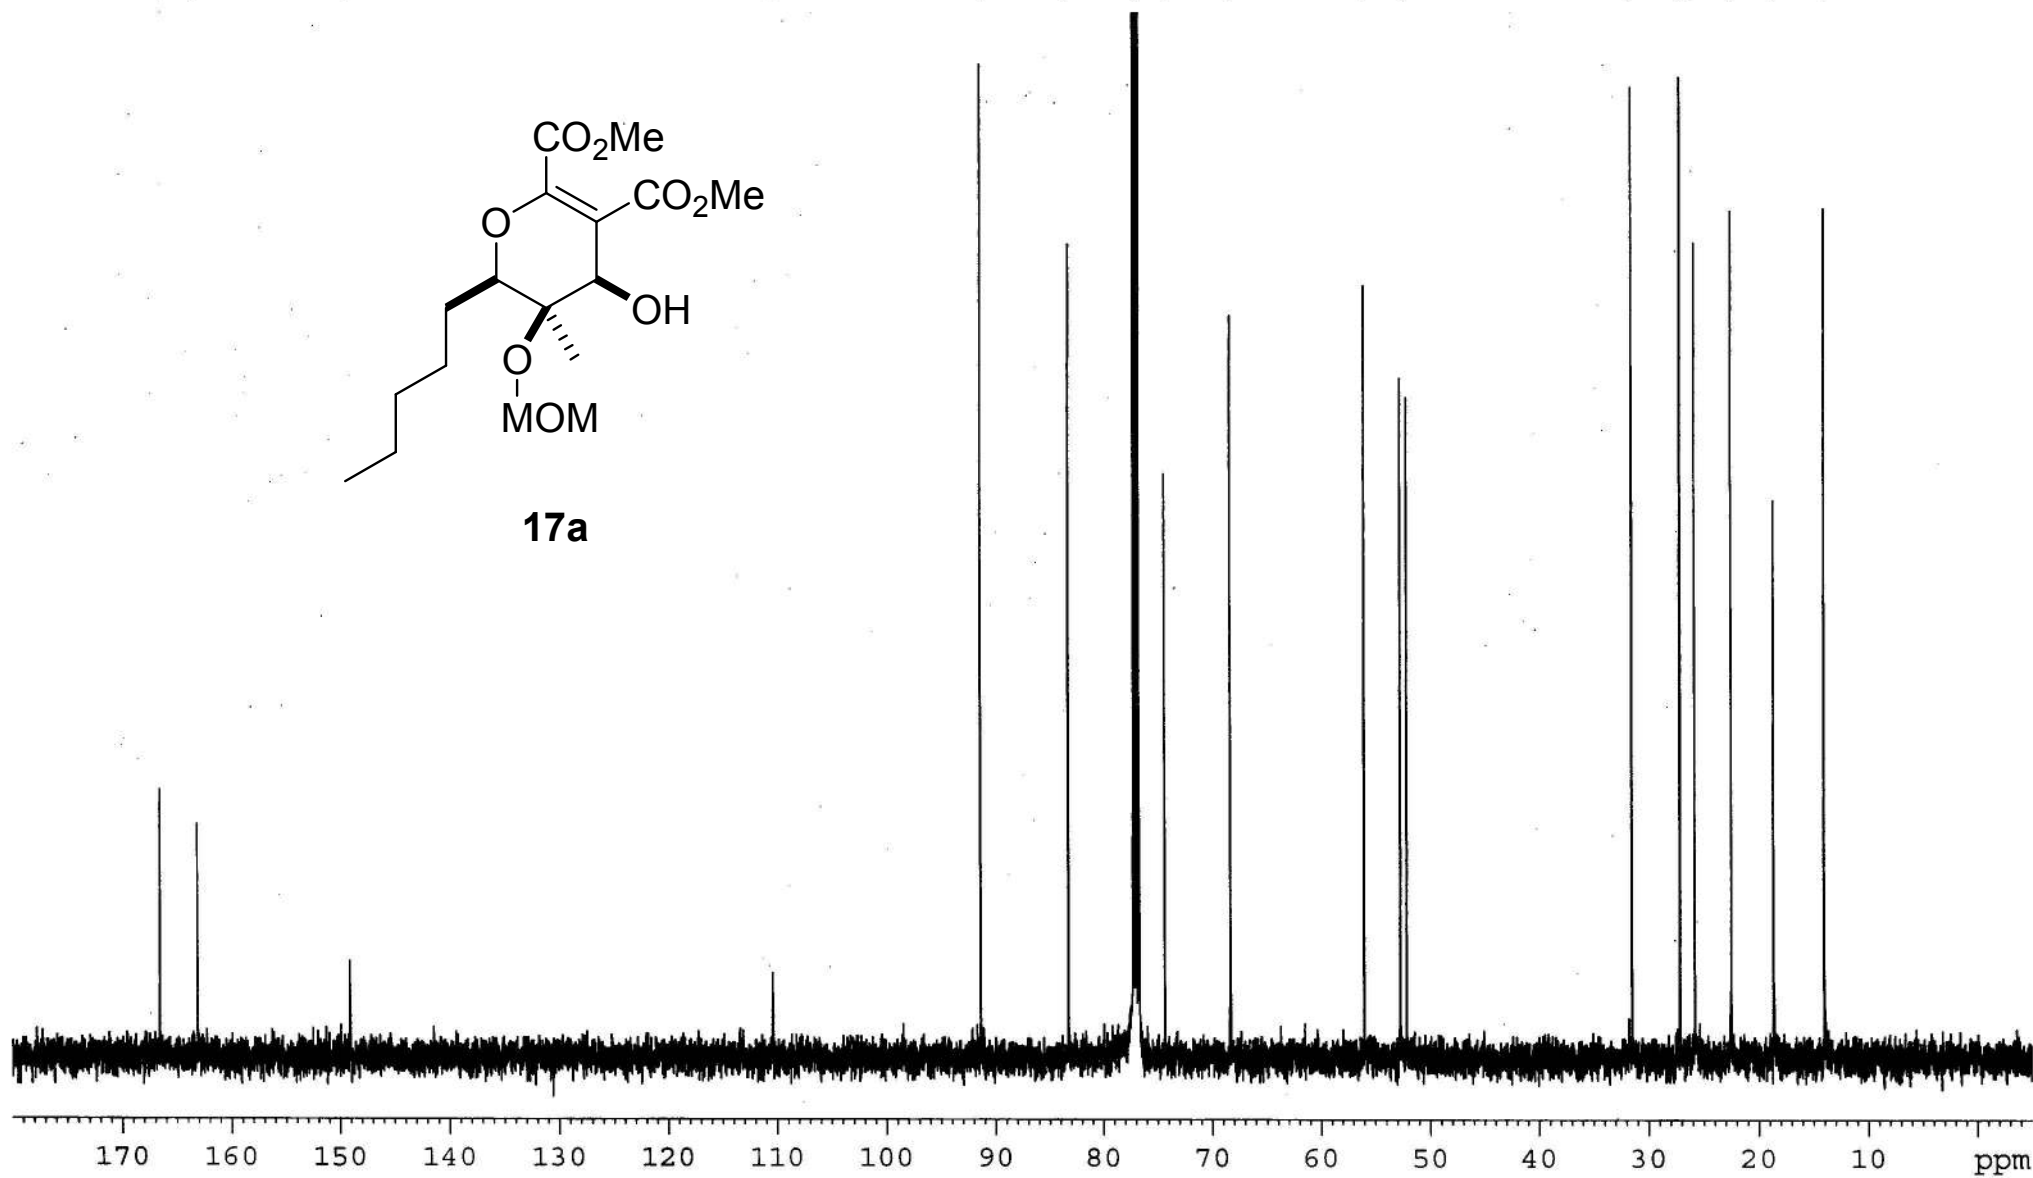

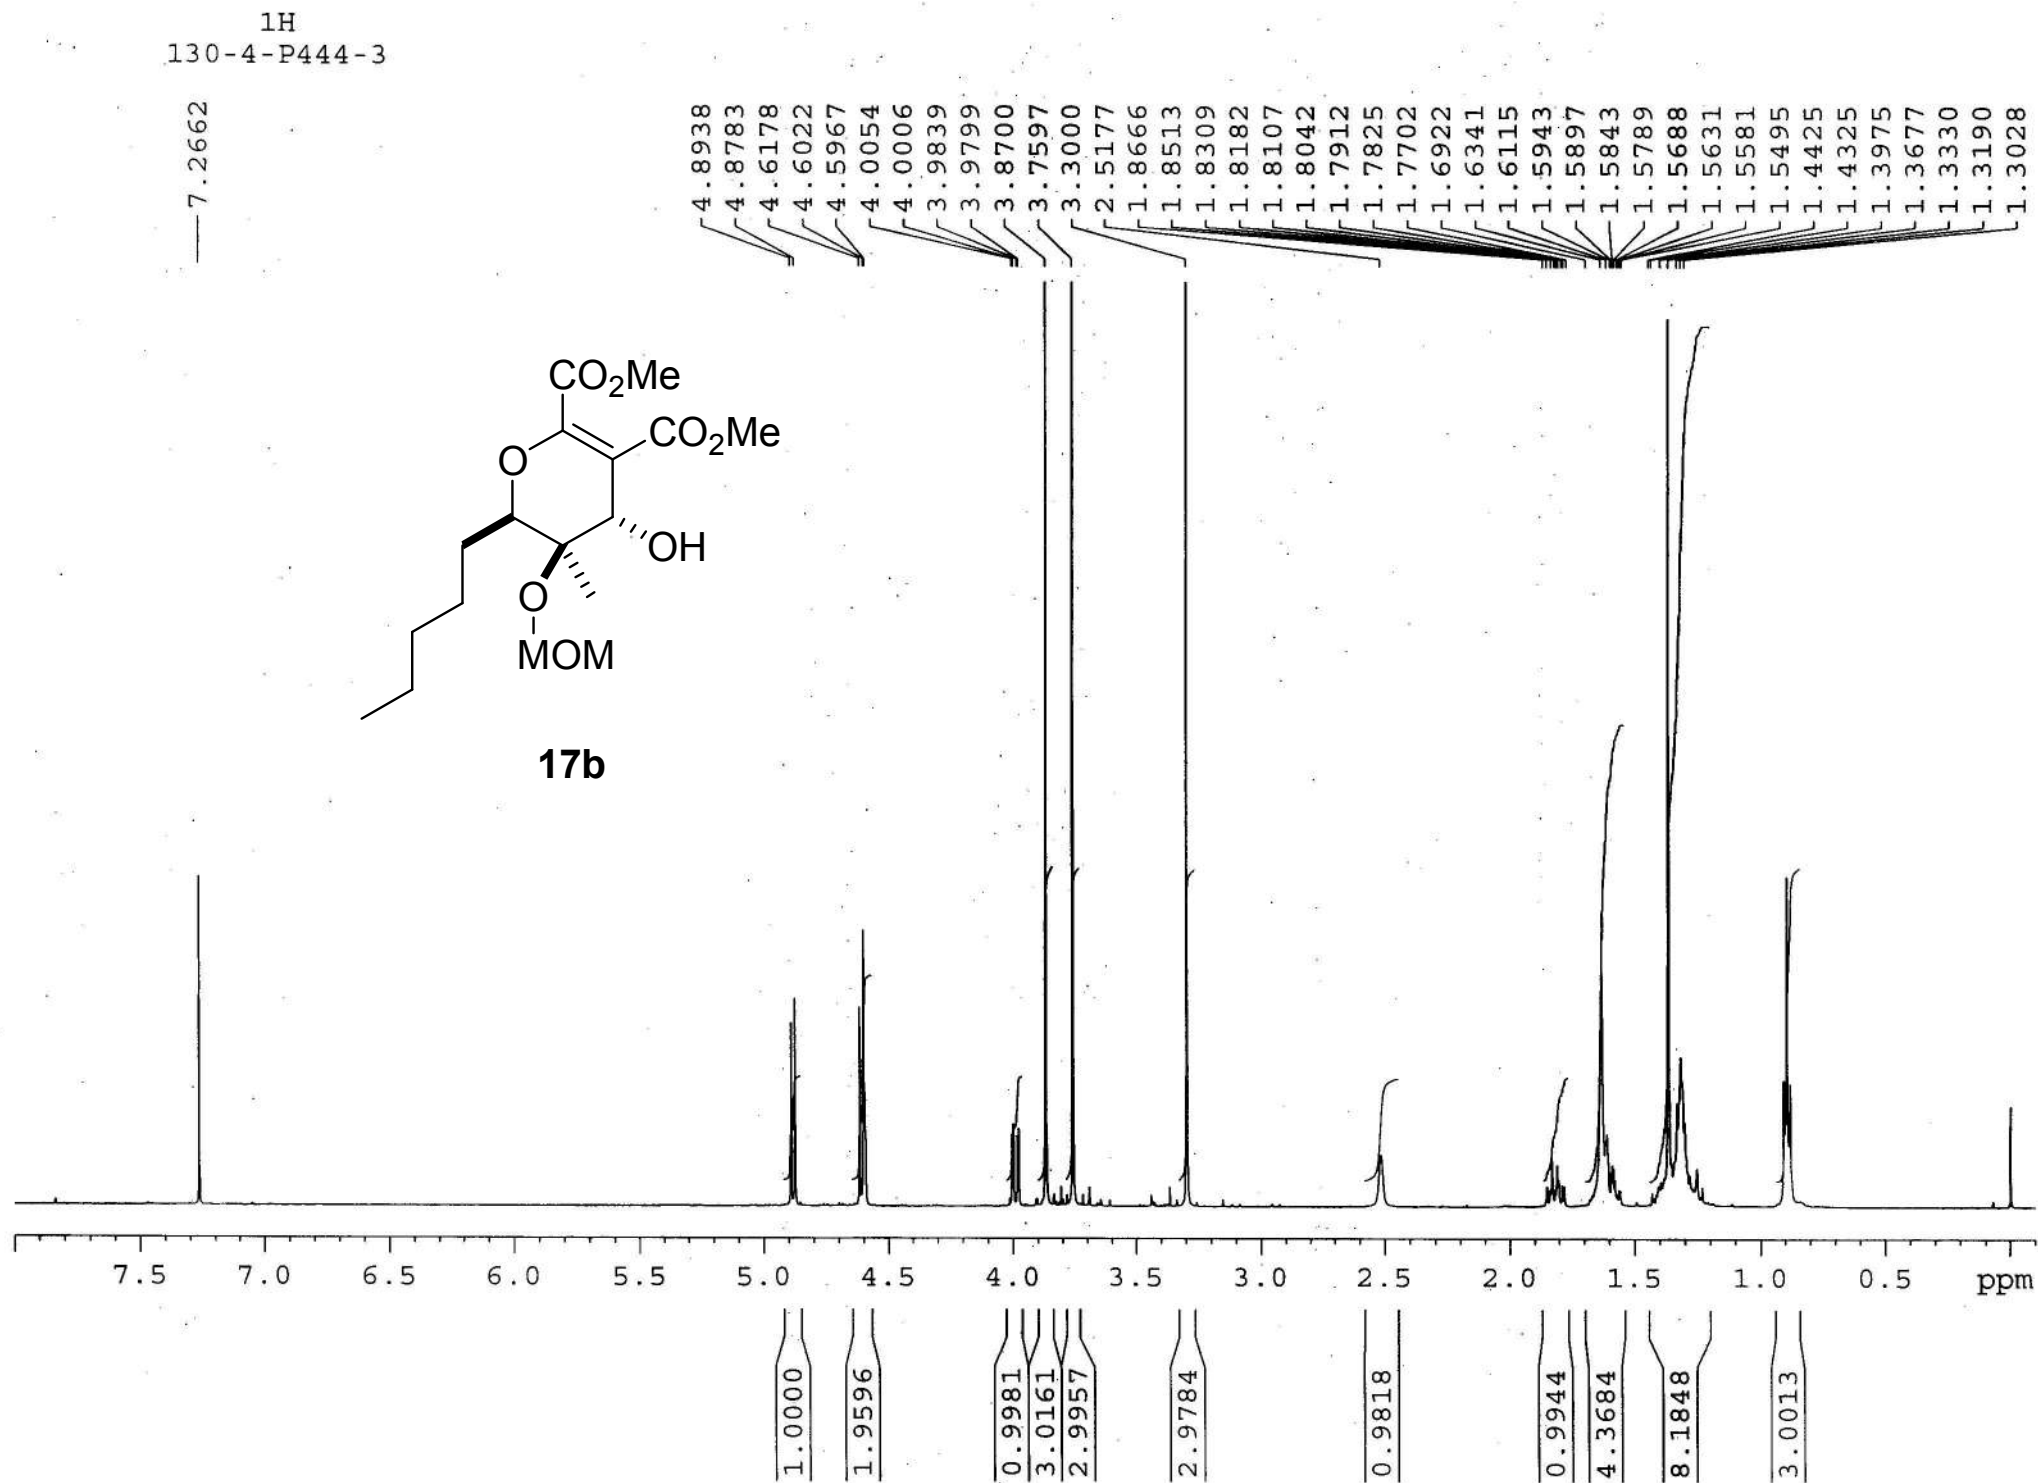

<sup>13</sup>C  
130-4-P444-3

—166.6323  
—163.9260

—156.1825

—105.2939

—91.1874

79.8079

77.2517

77.0000

76.7431

74.3766

—65.7647

—55.7008

—52.8140

—51.9181

—31.6796

—27.1296

—25.4091

—22.5147

—16.9630

—14.0288

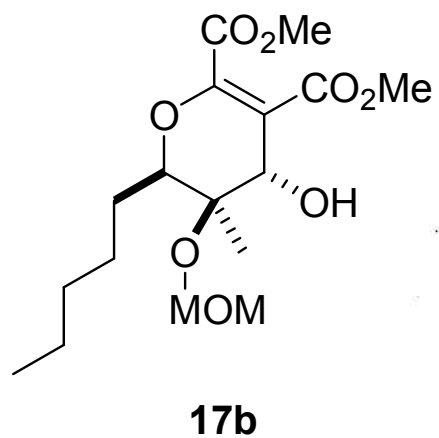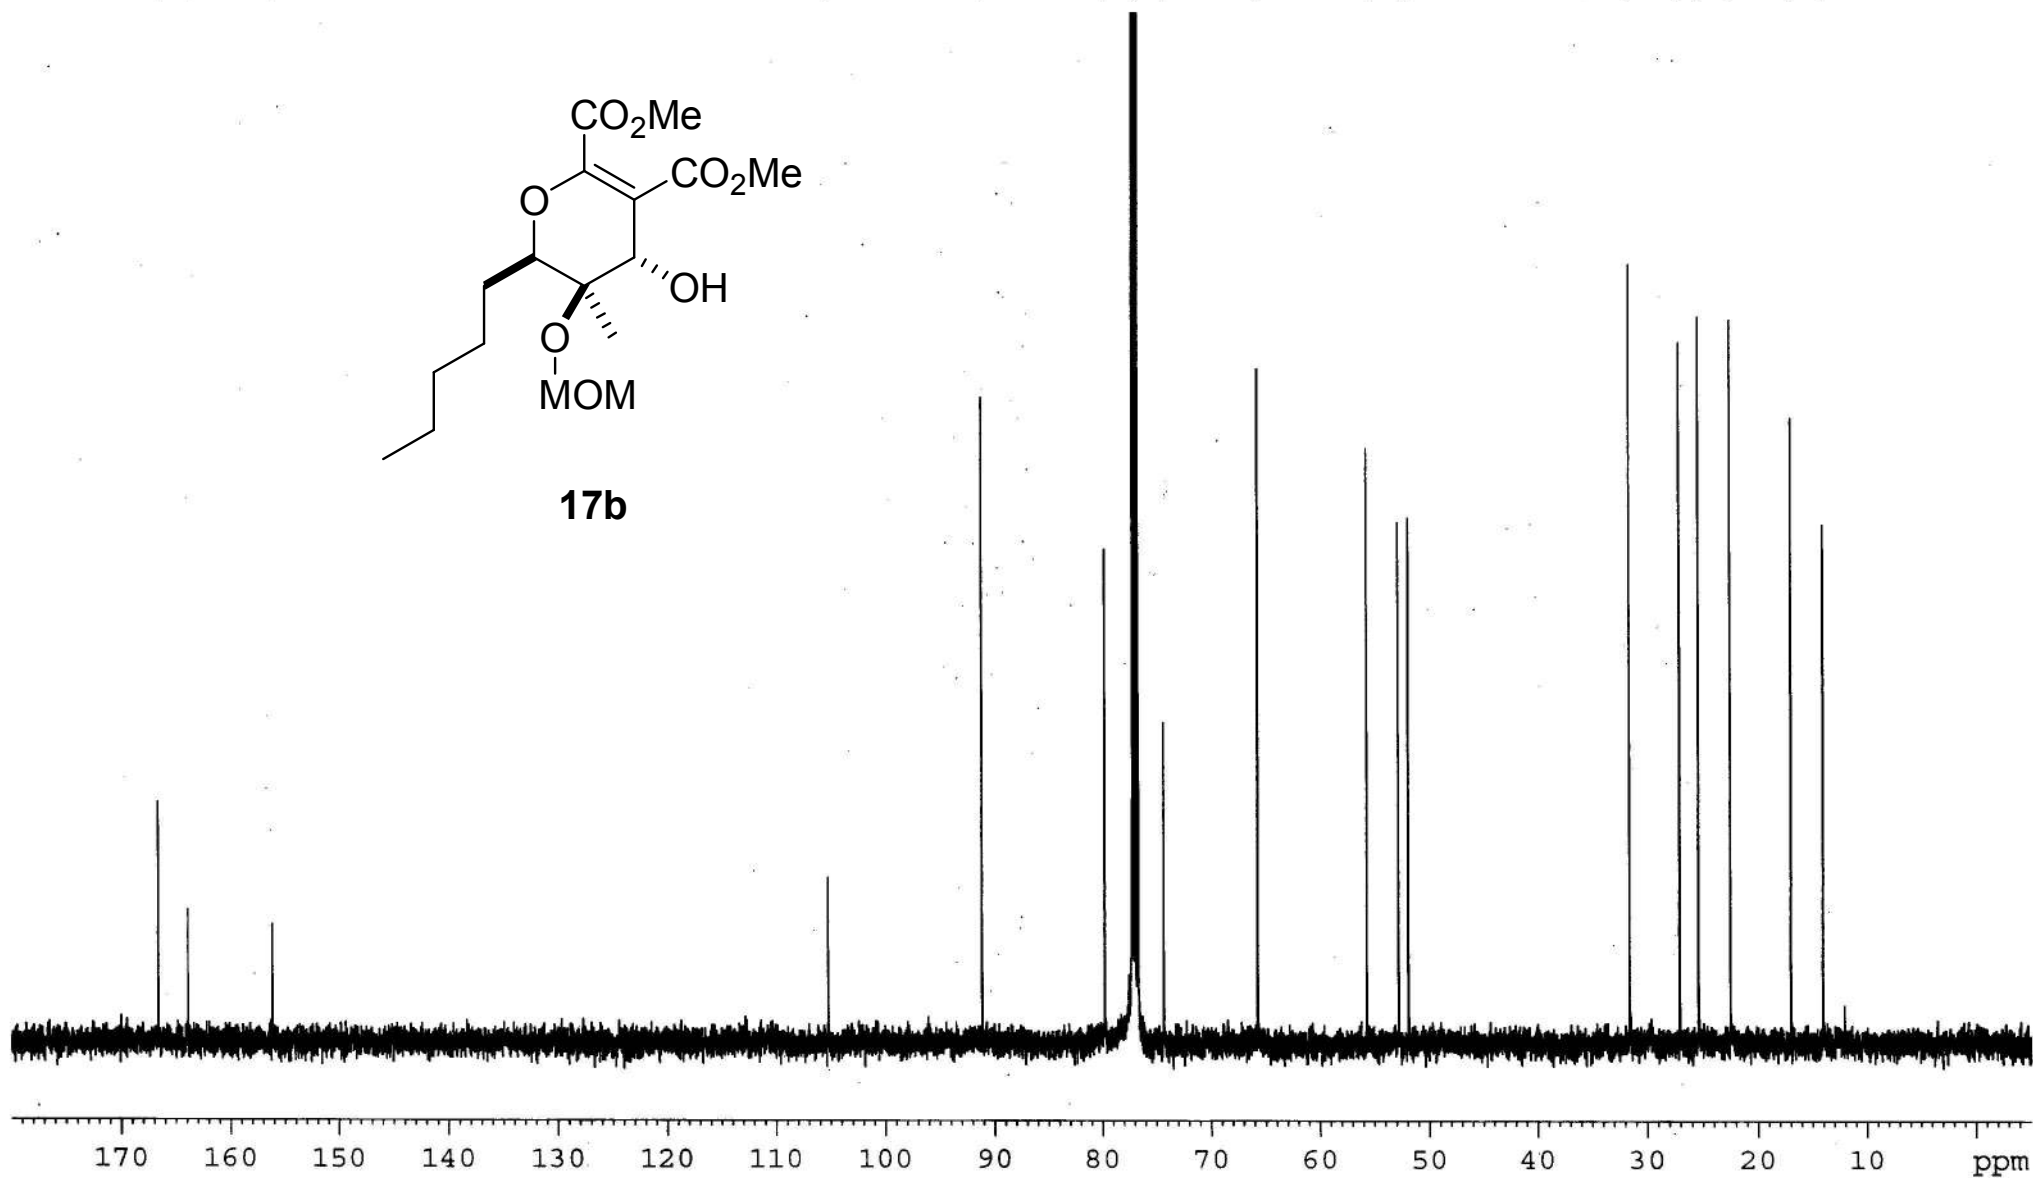

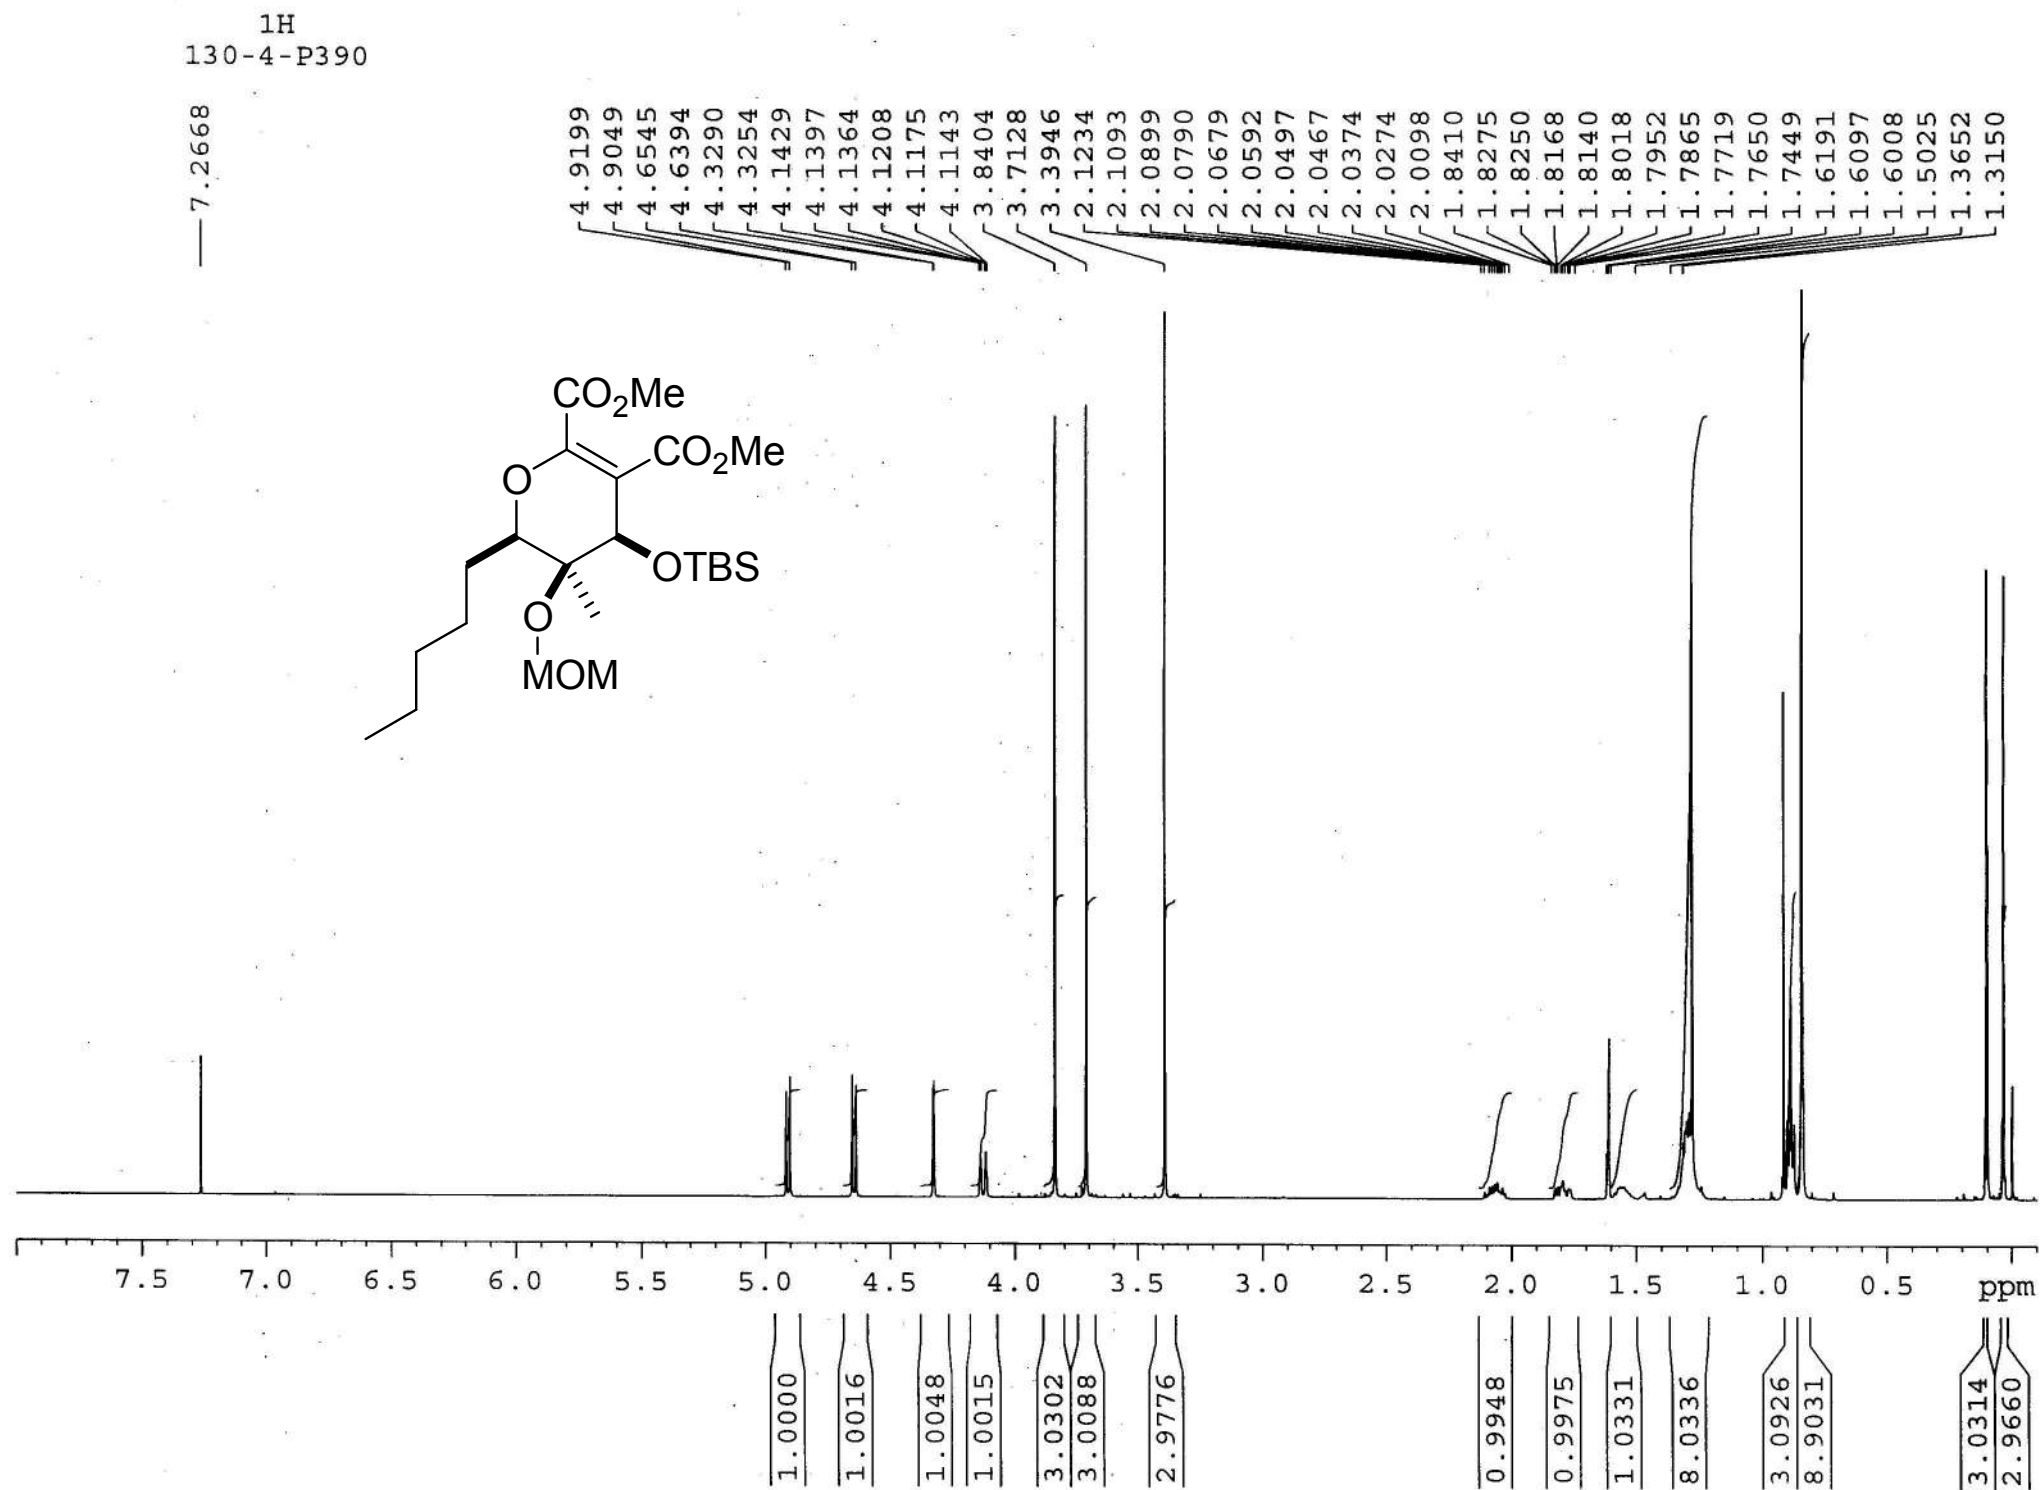

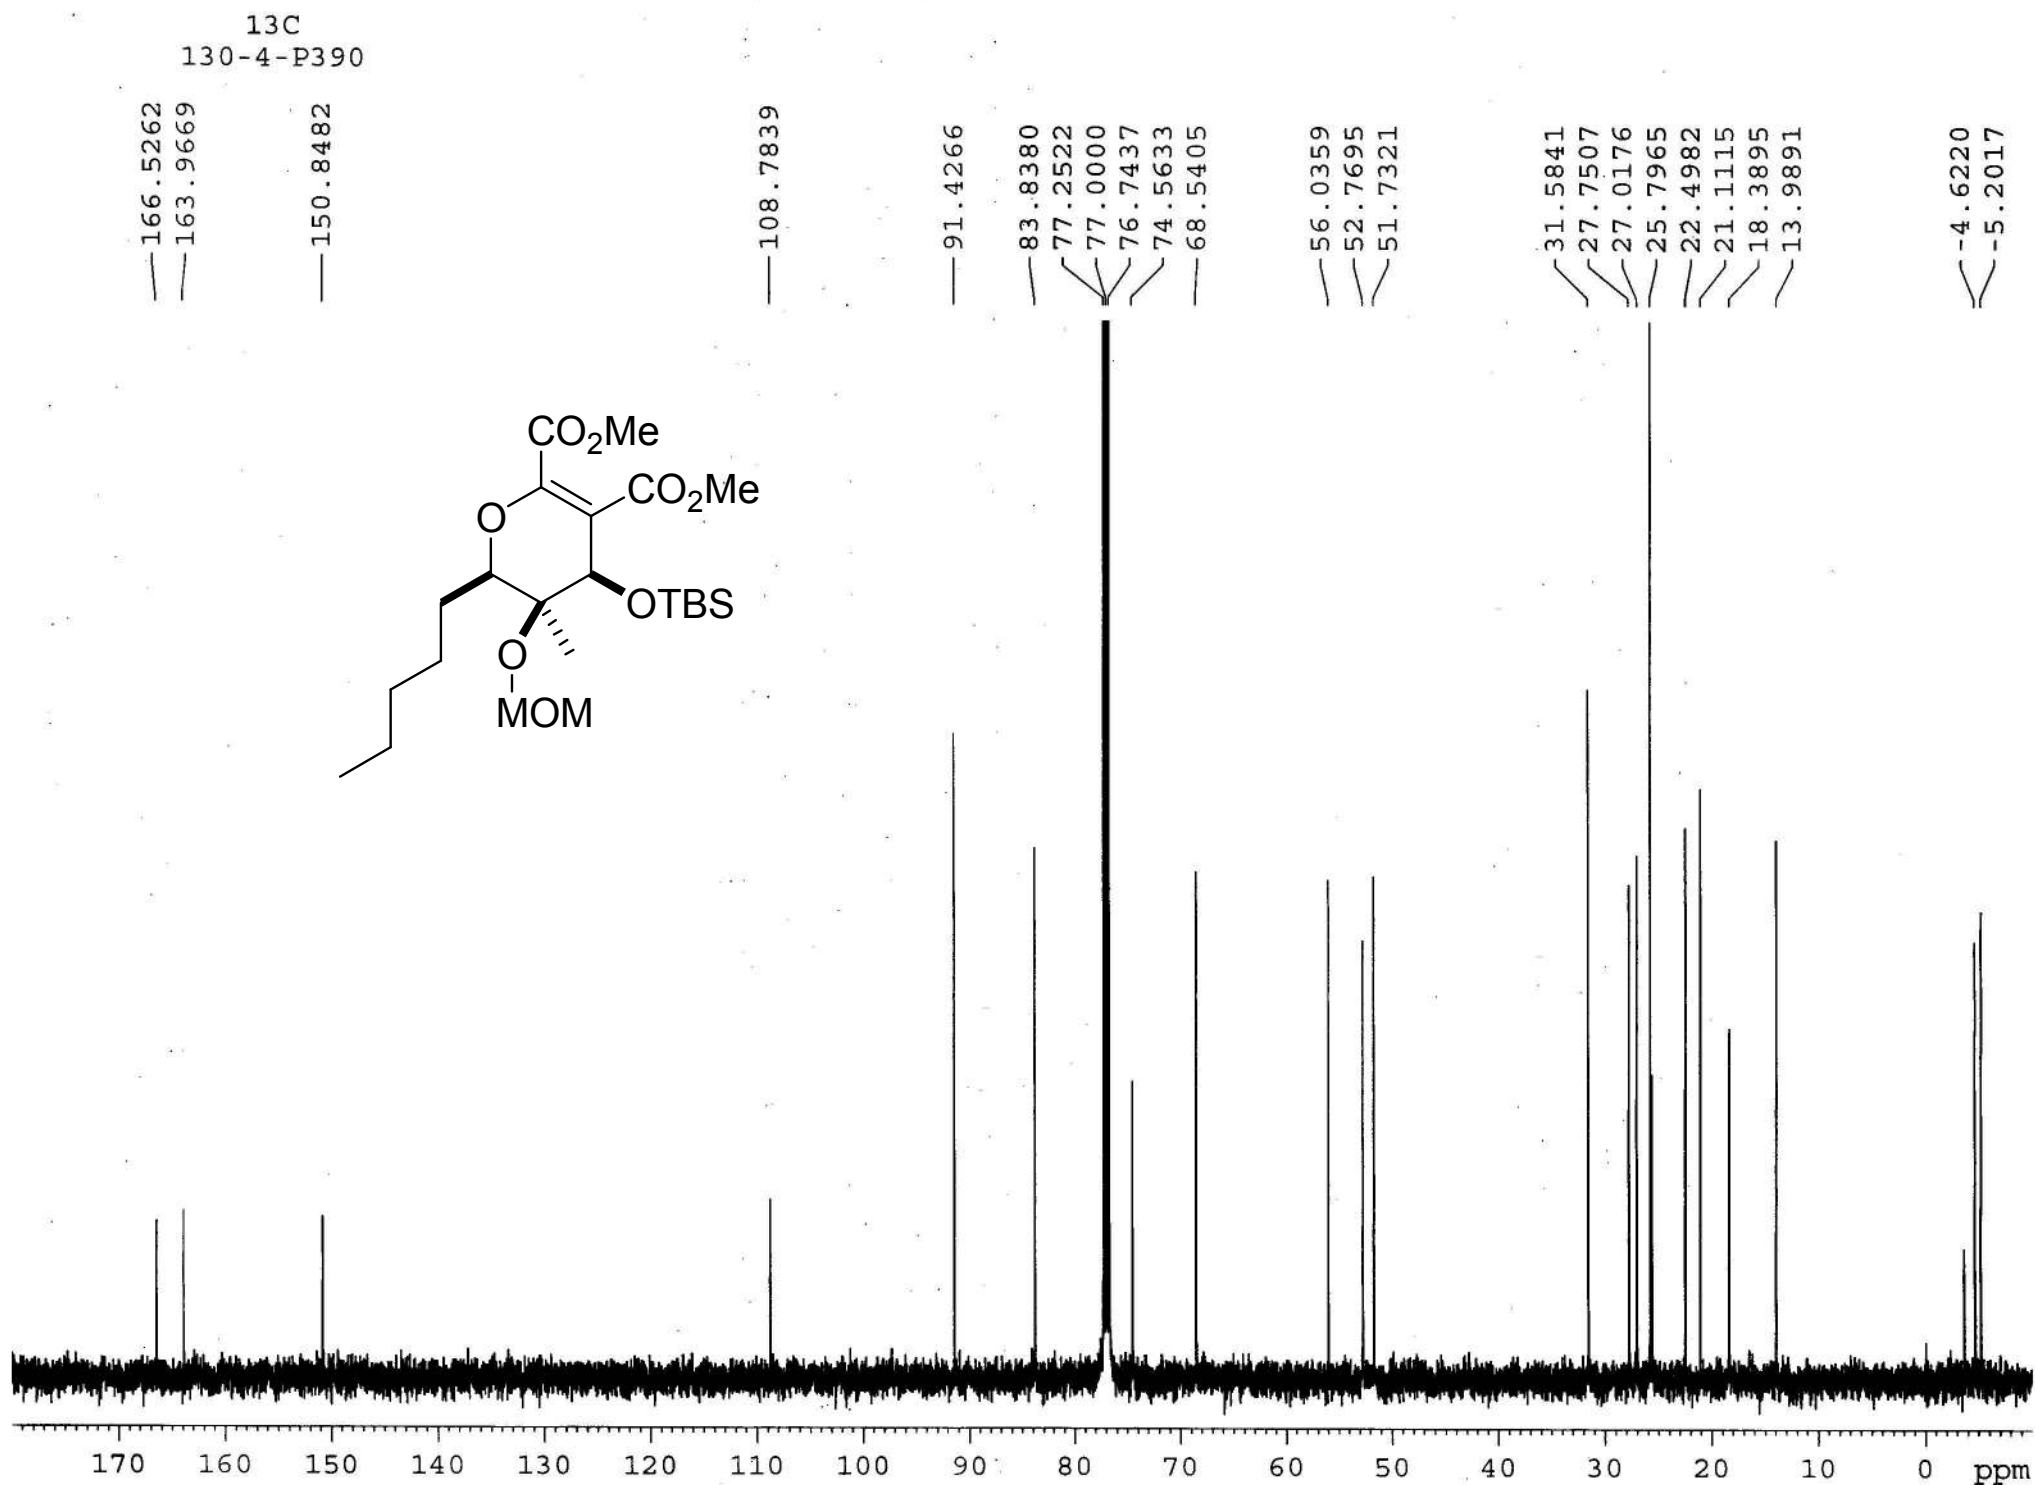

<sup>1</sup>H  
130-4-P392

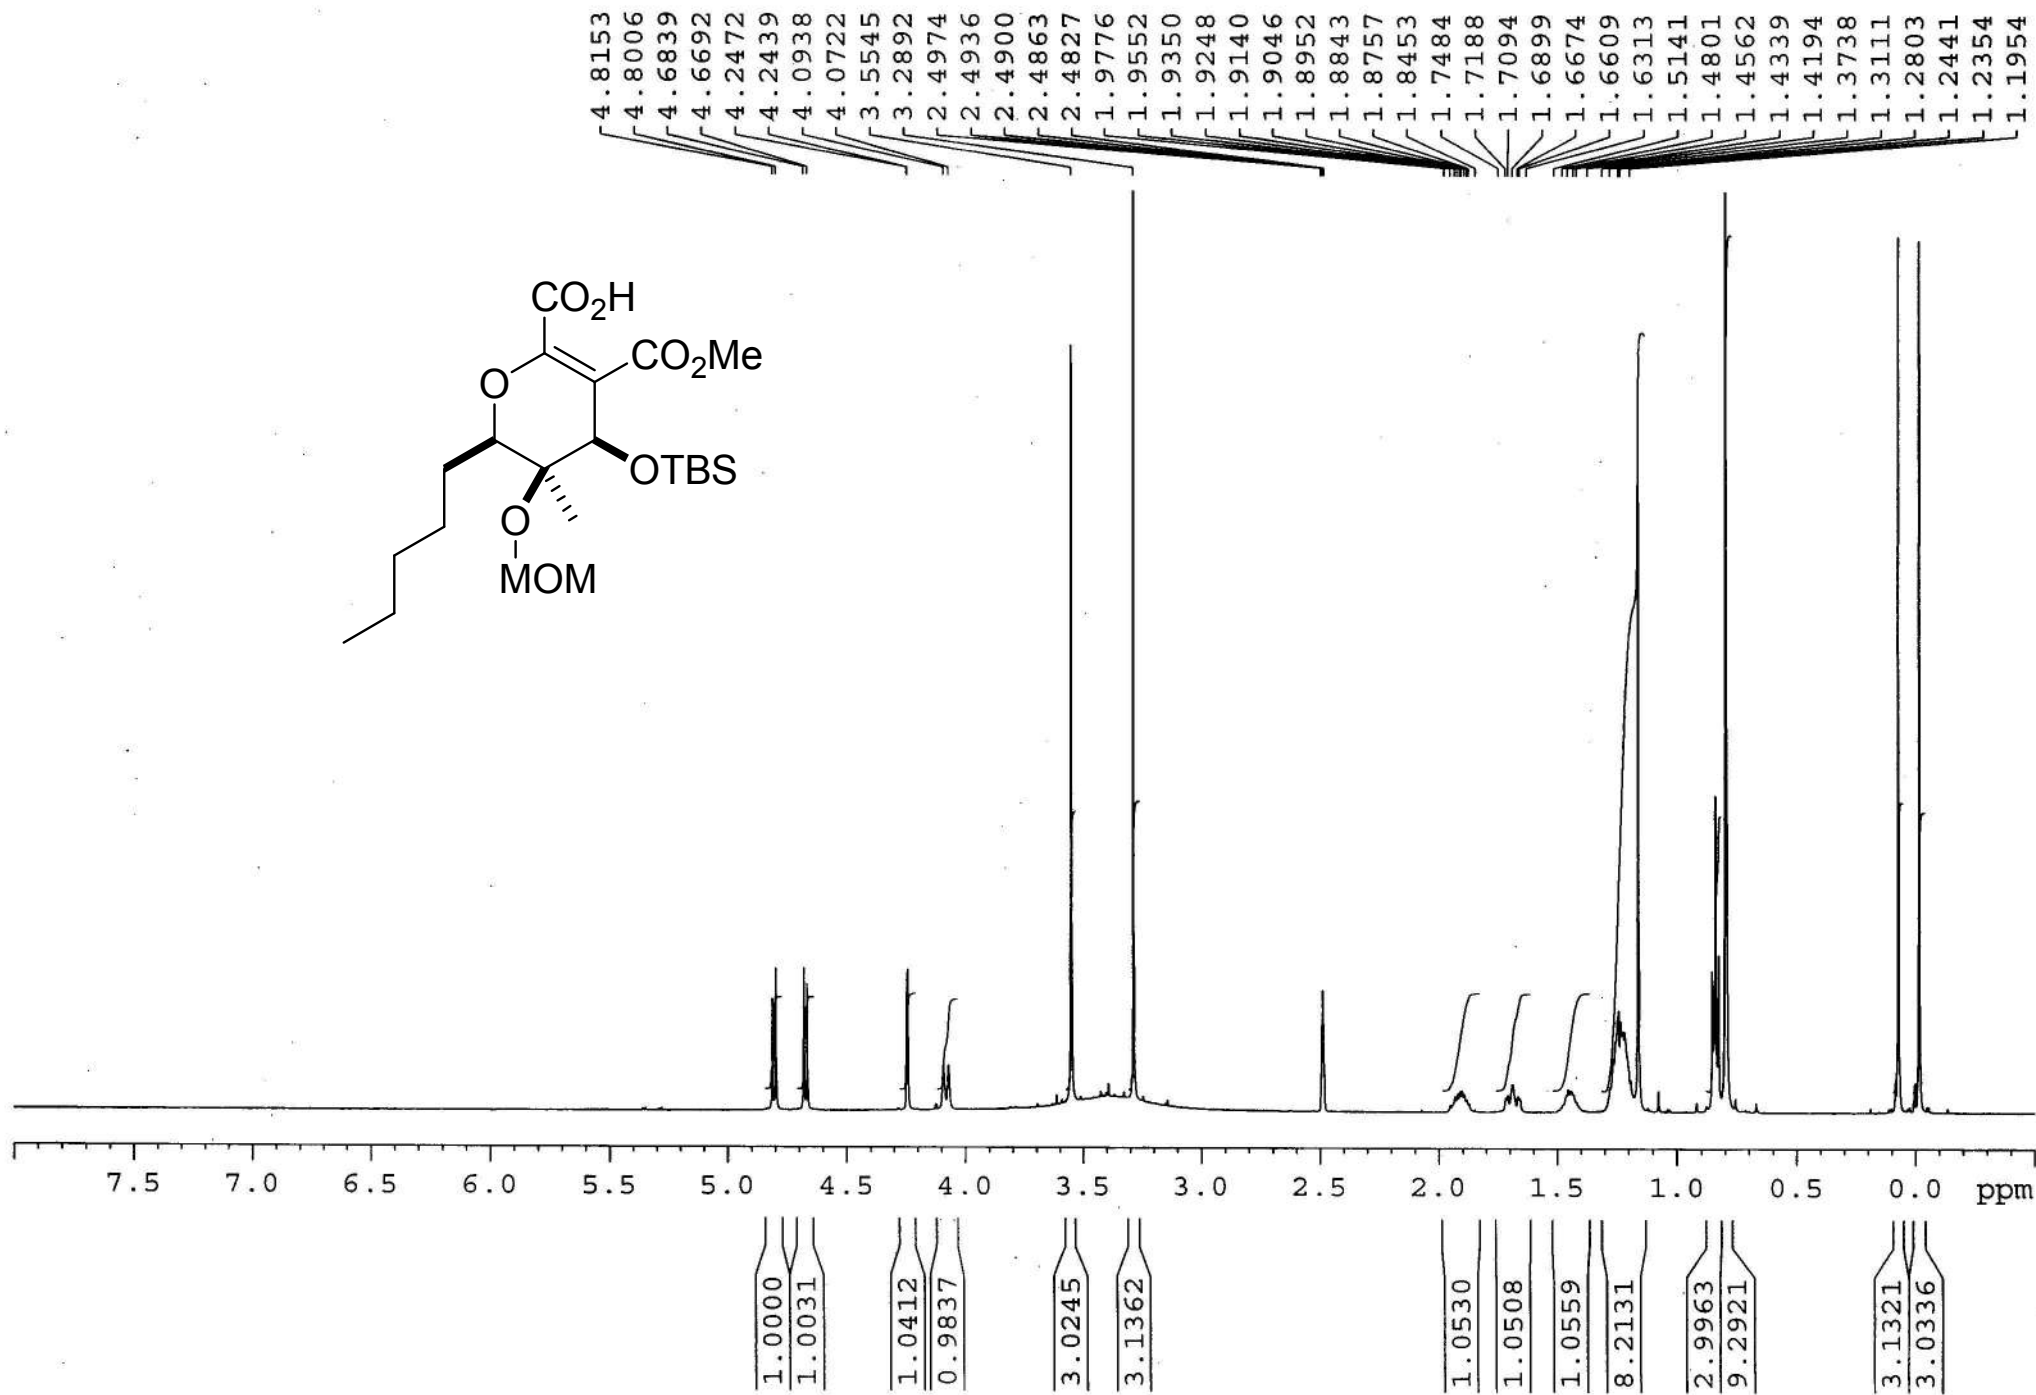

kk130-4-P392 2 1 C:\Bruker\TOPSPIN

carbon AV600

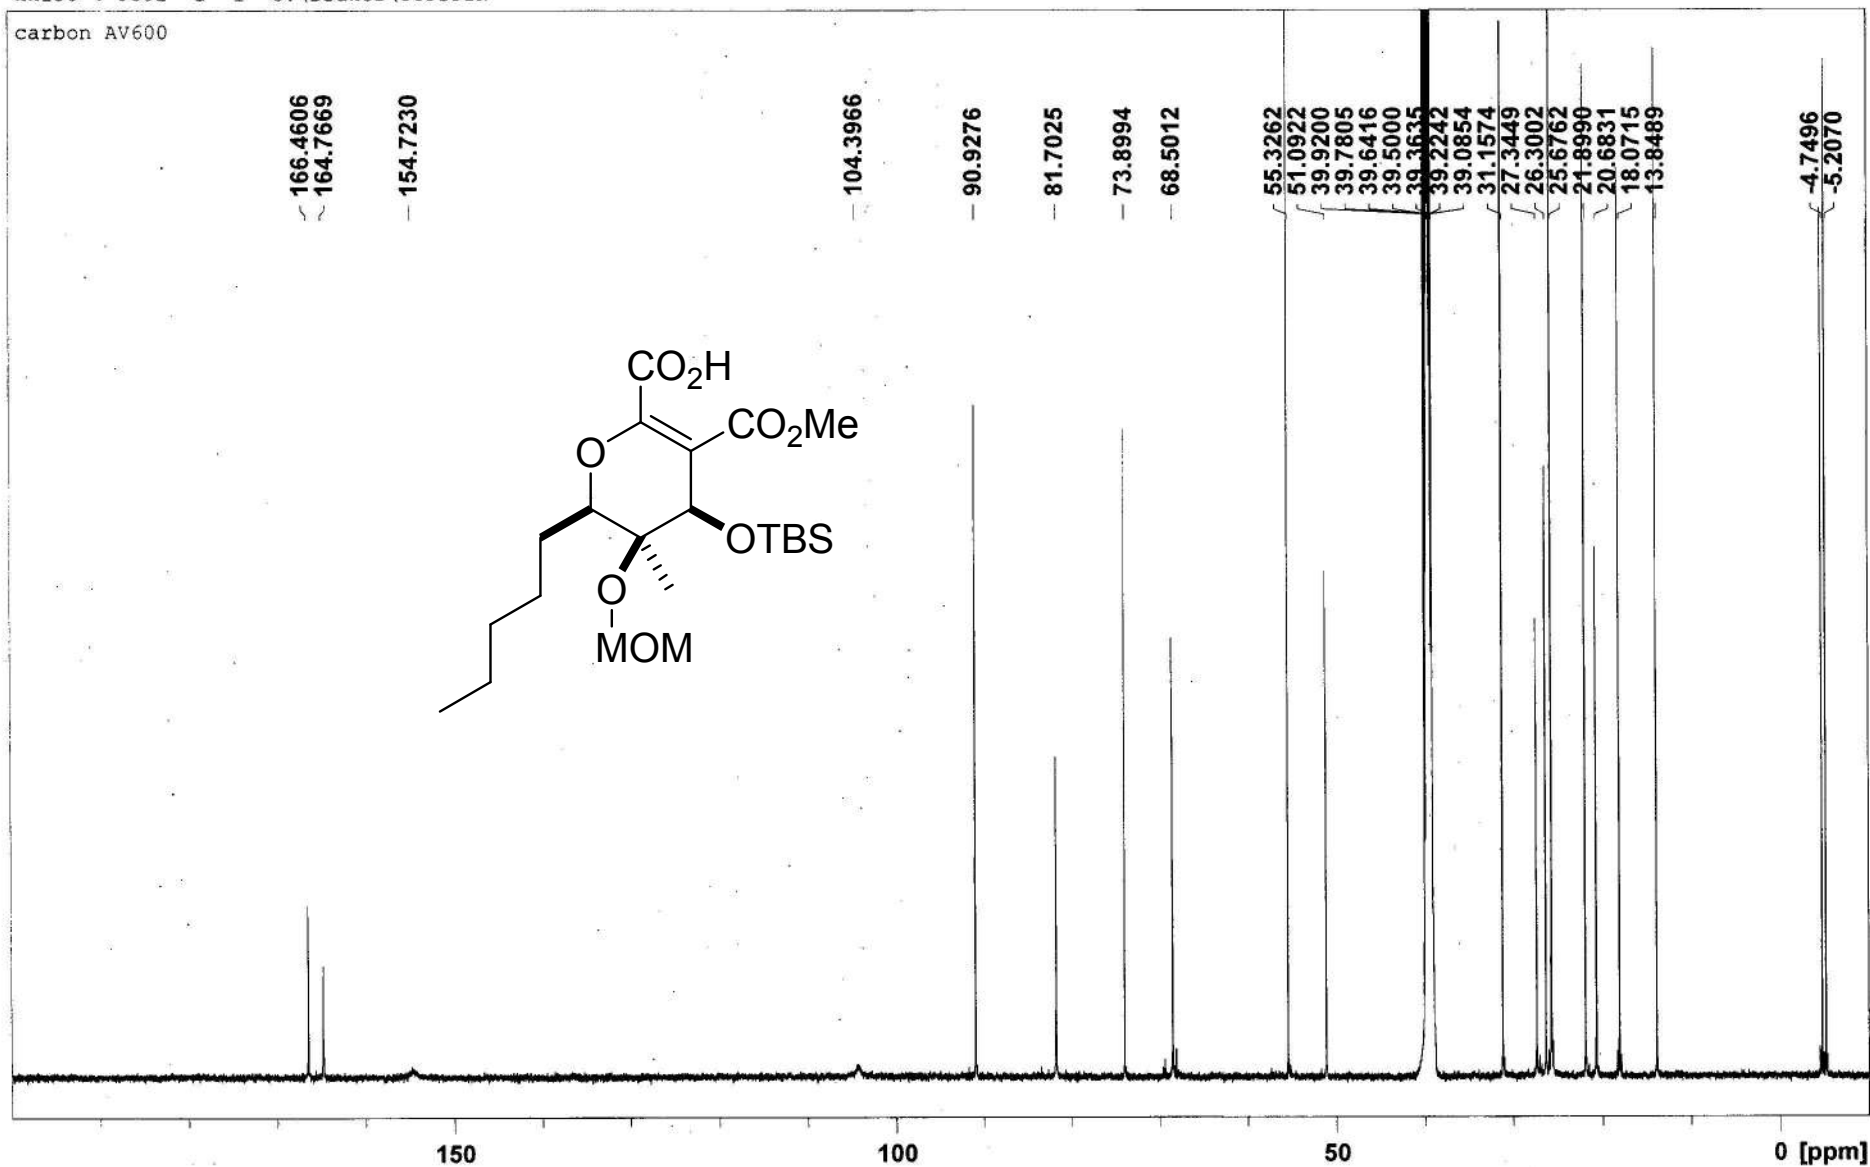

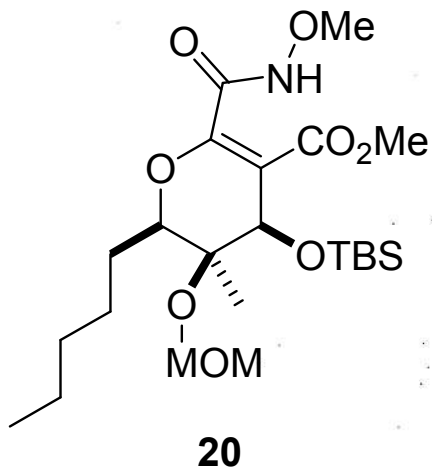

<sup>13</sup>C  
130-4-P396

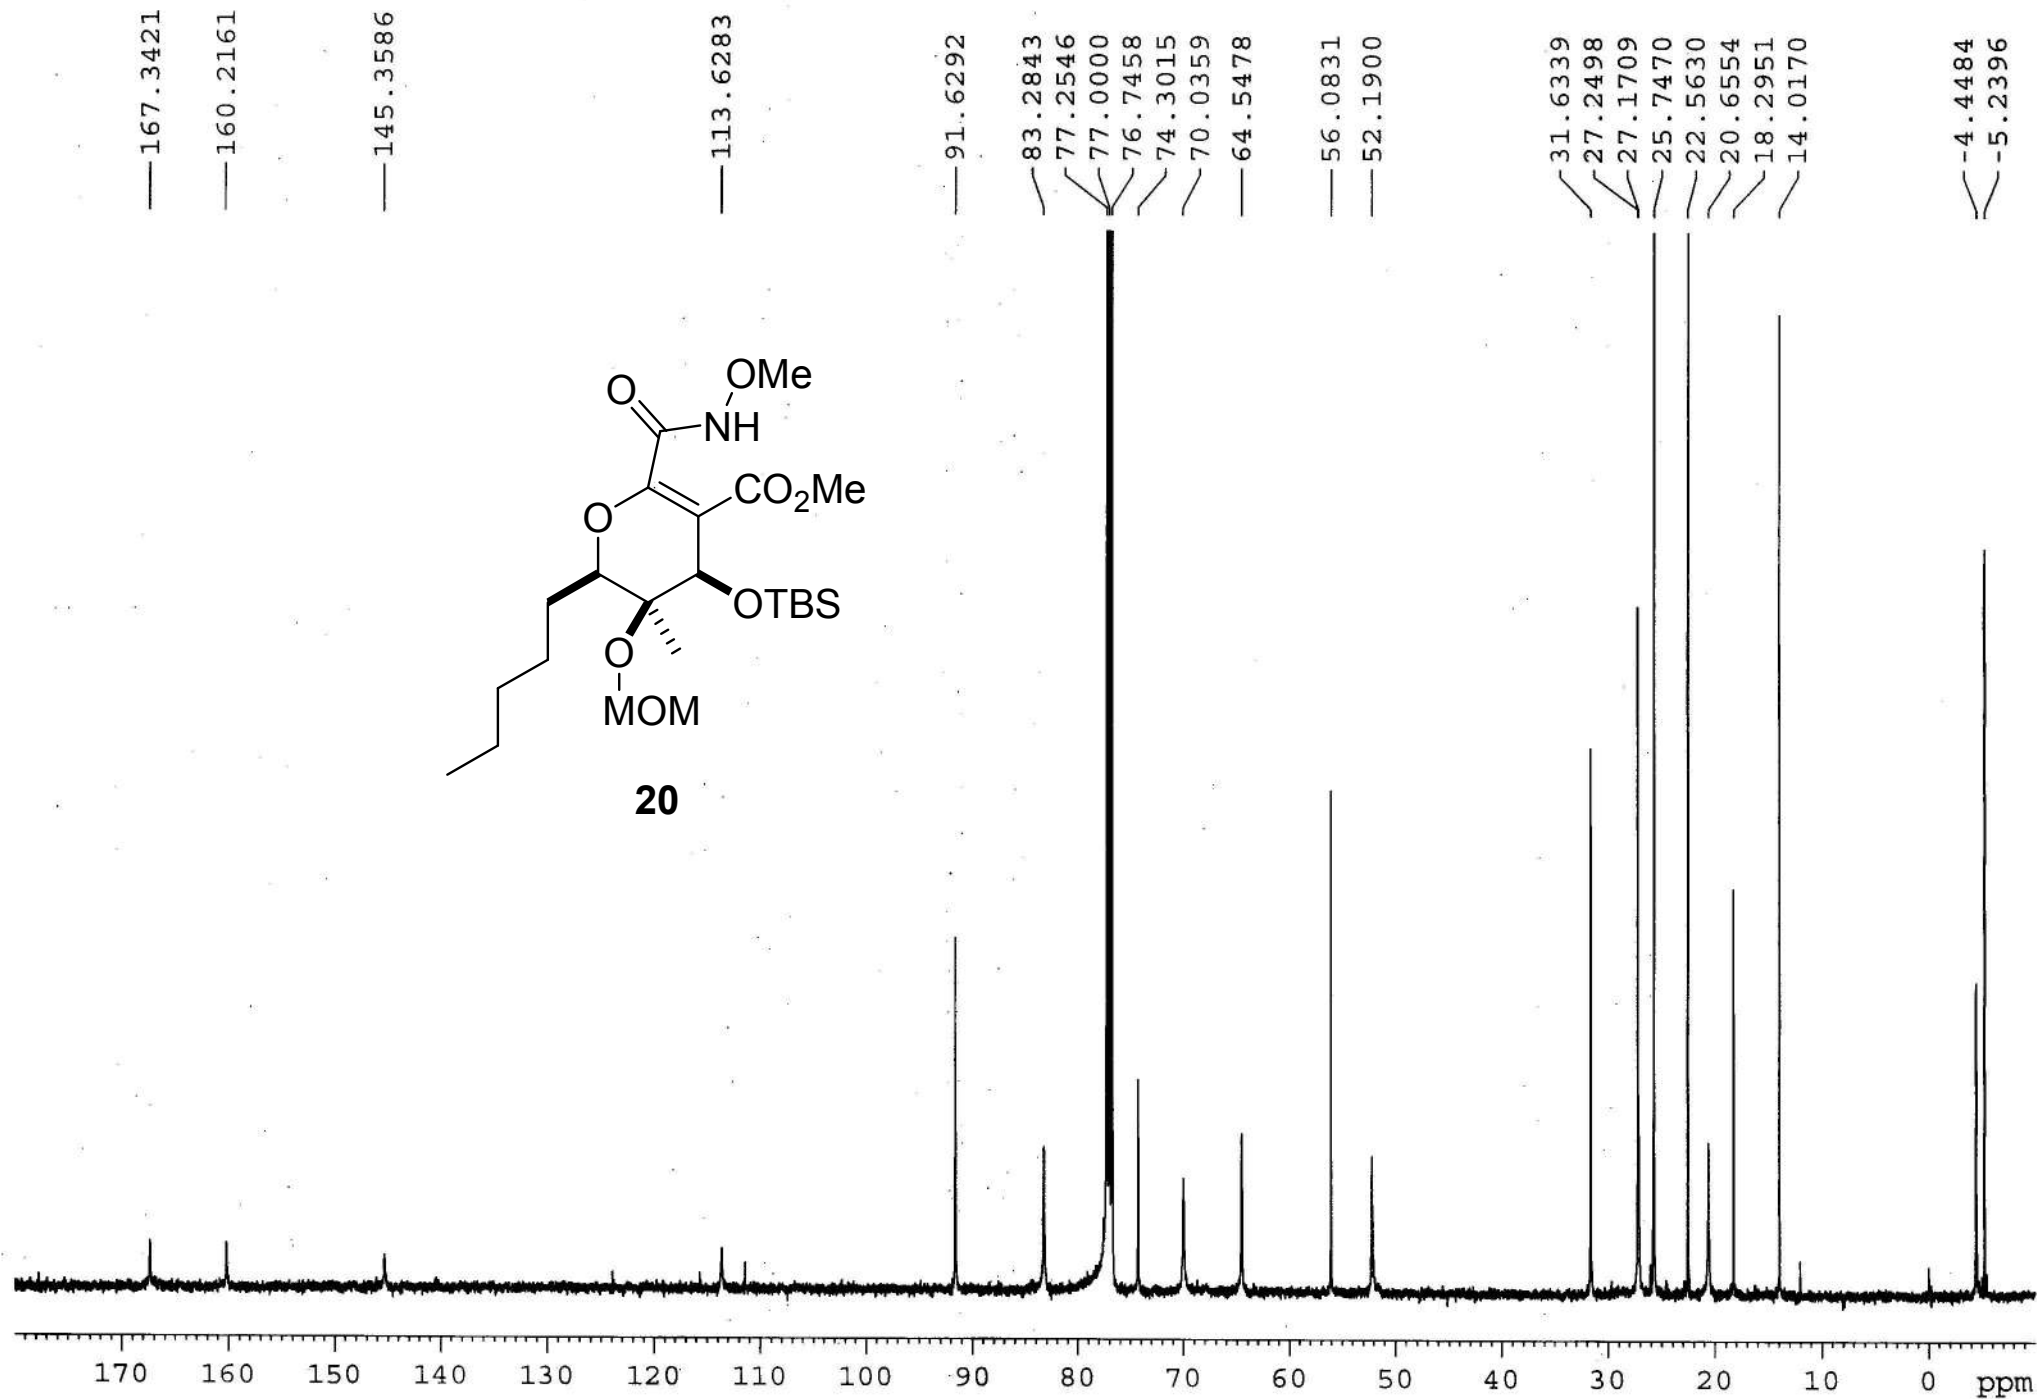

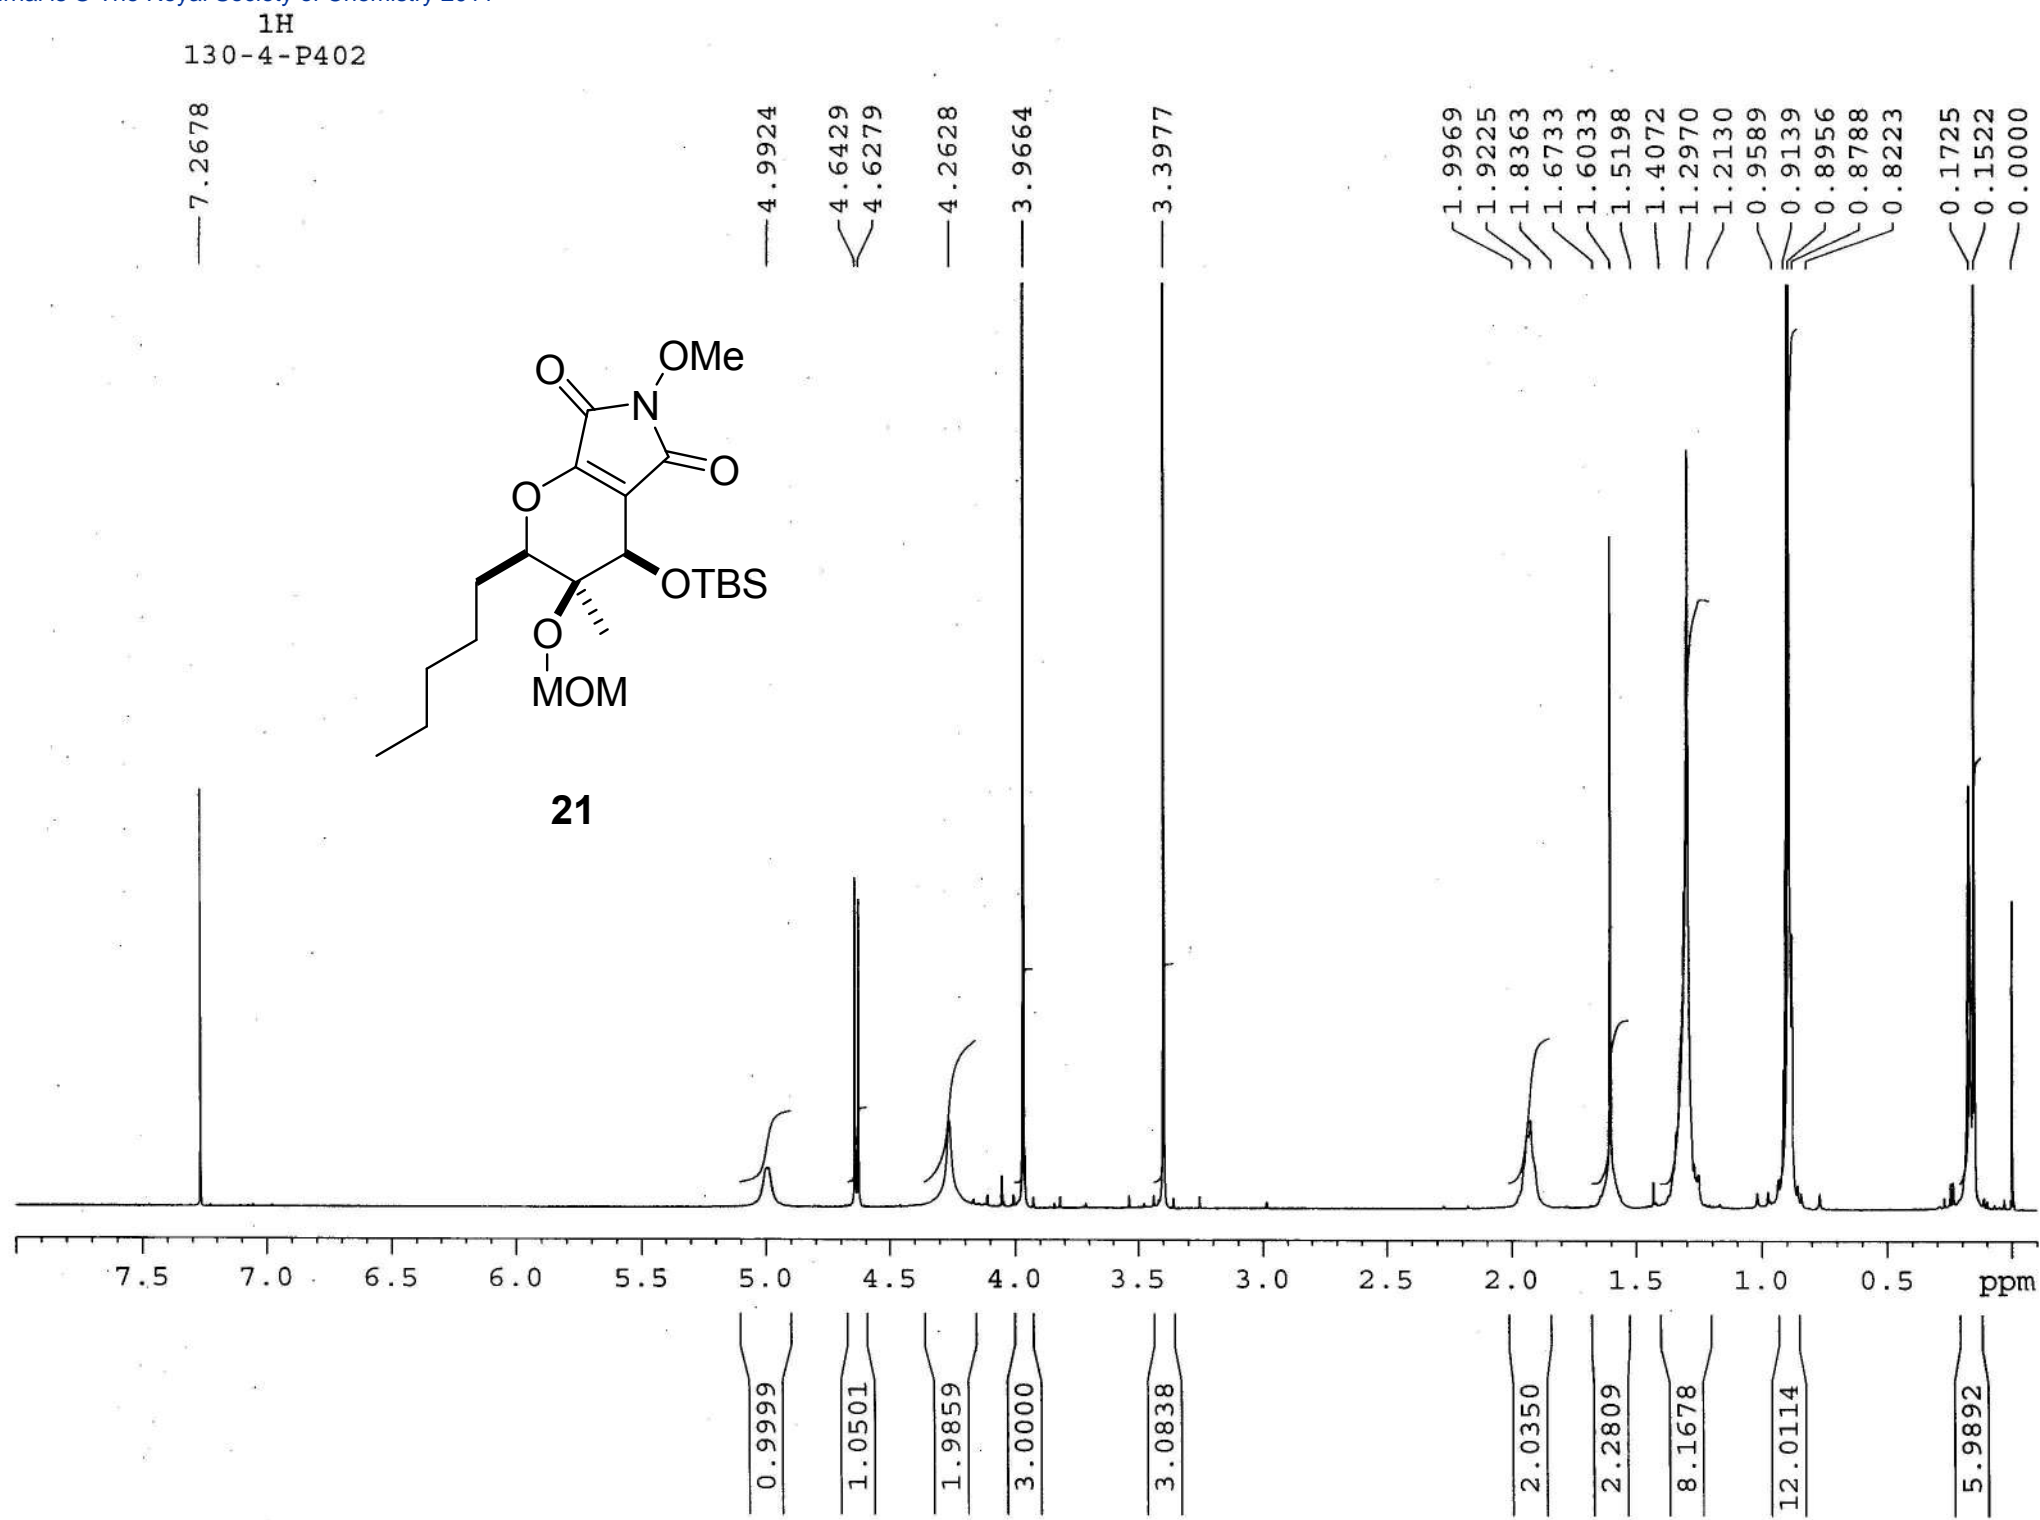

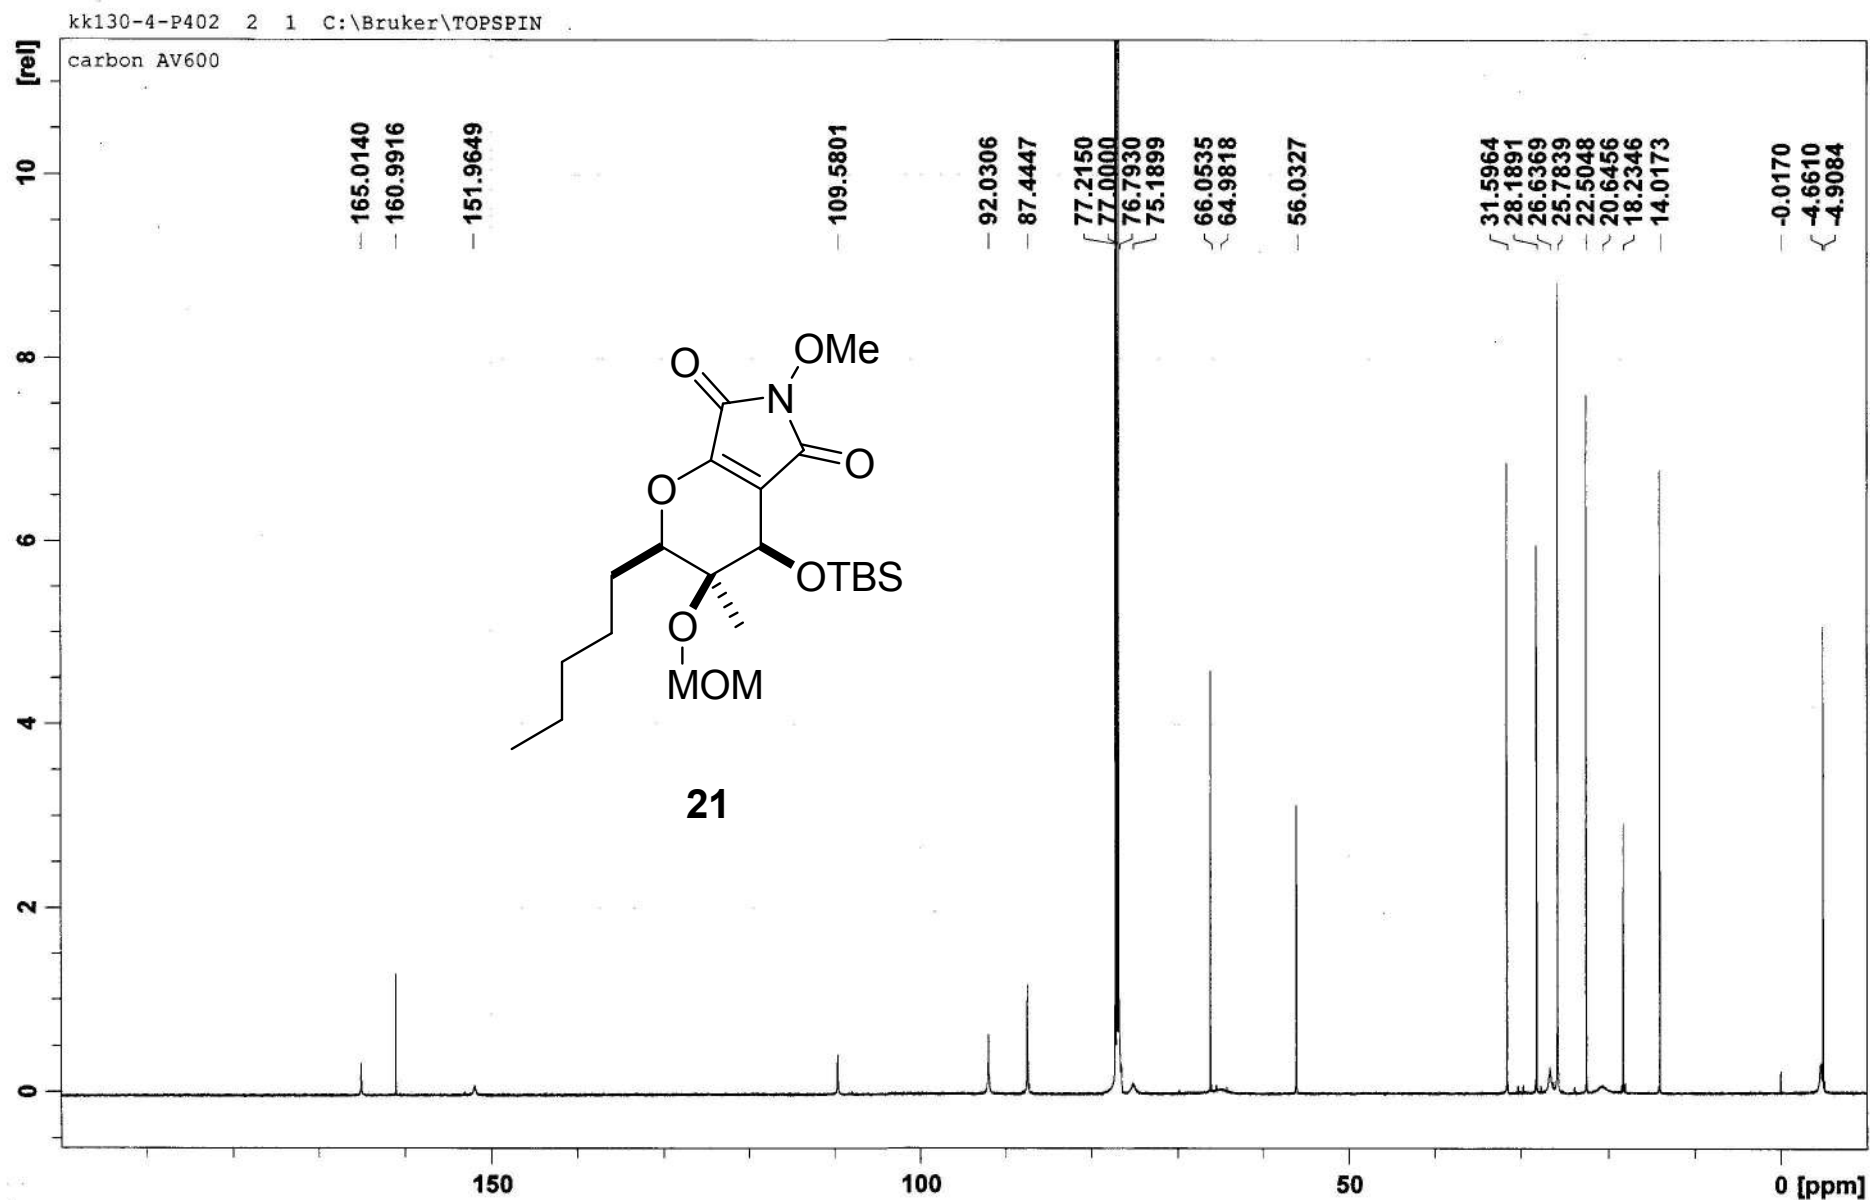

<sup>1</sup>H  
130-4-P411

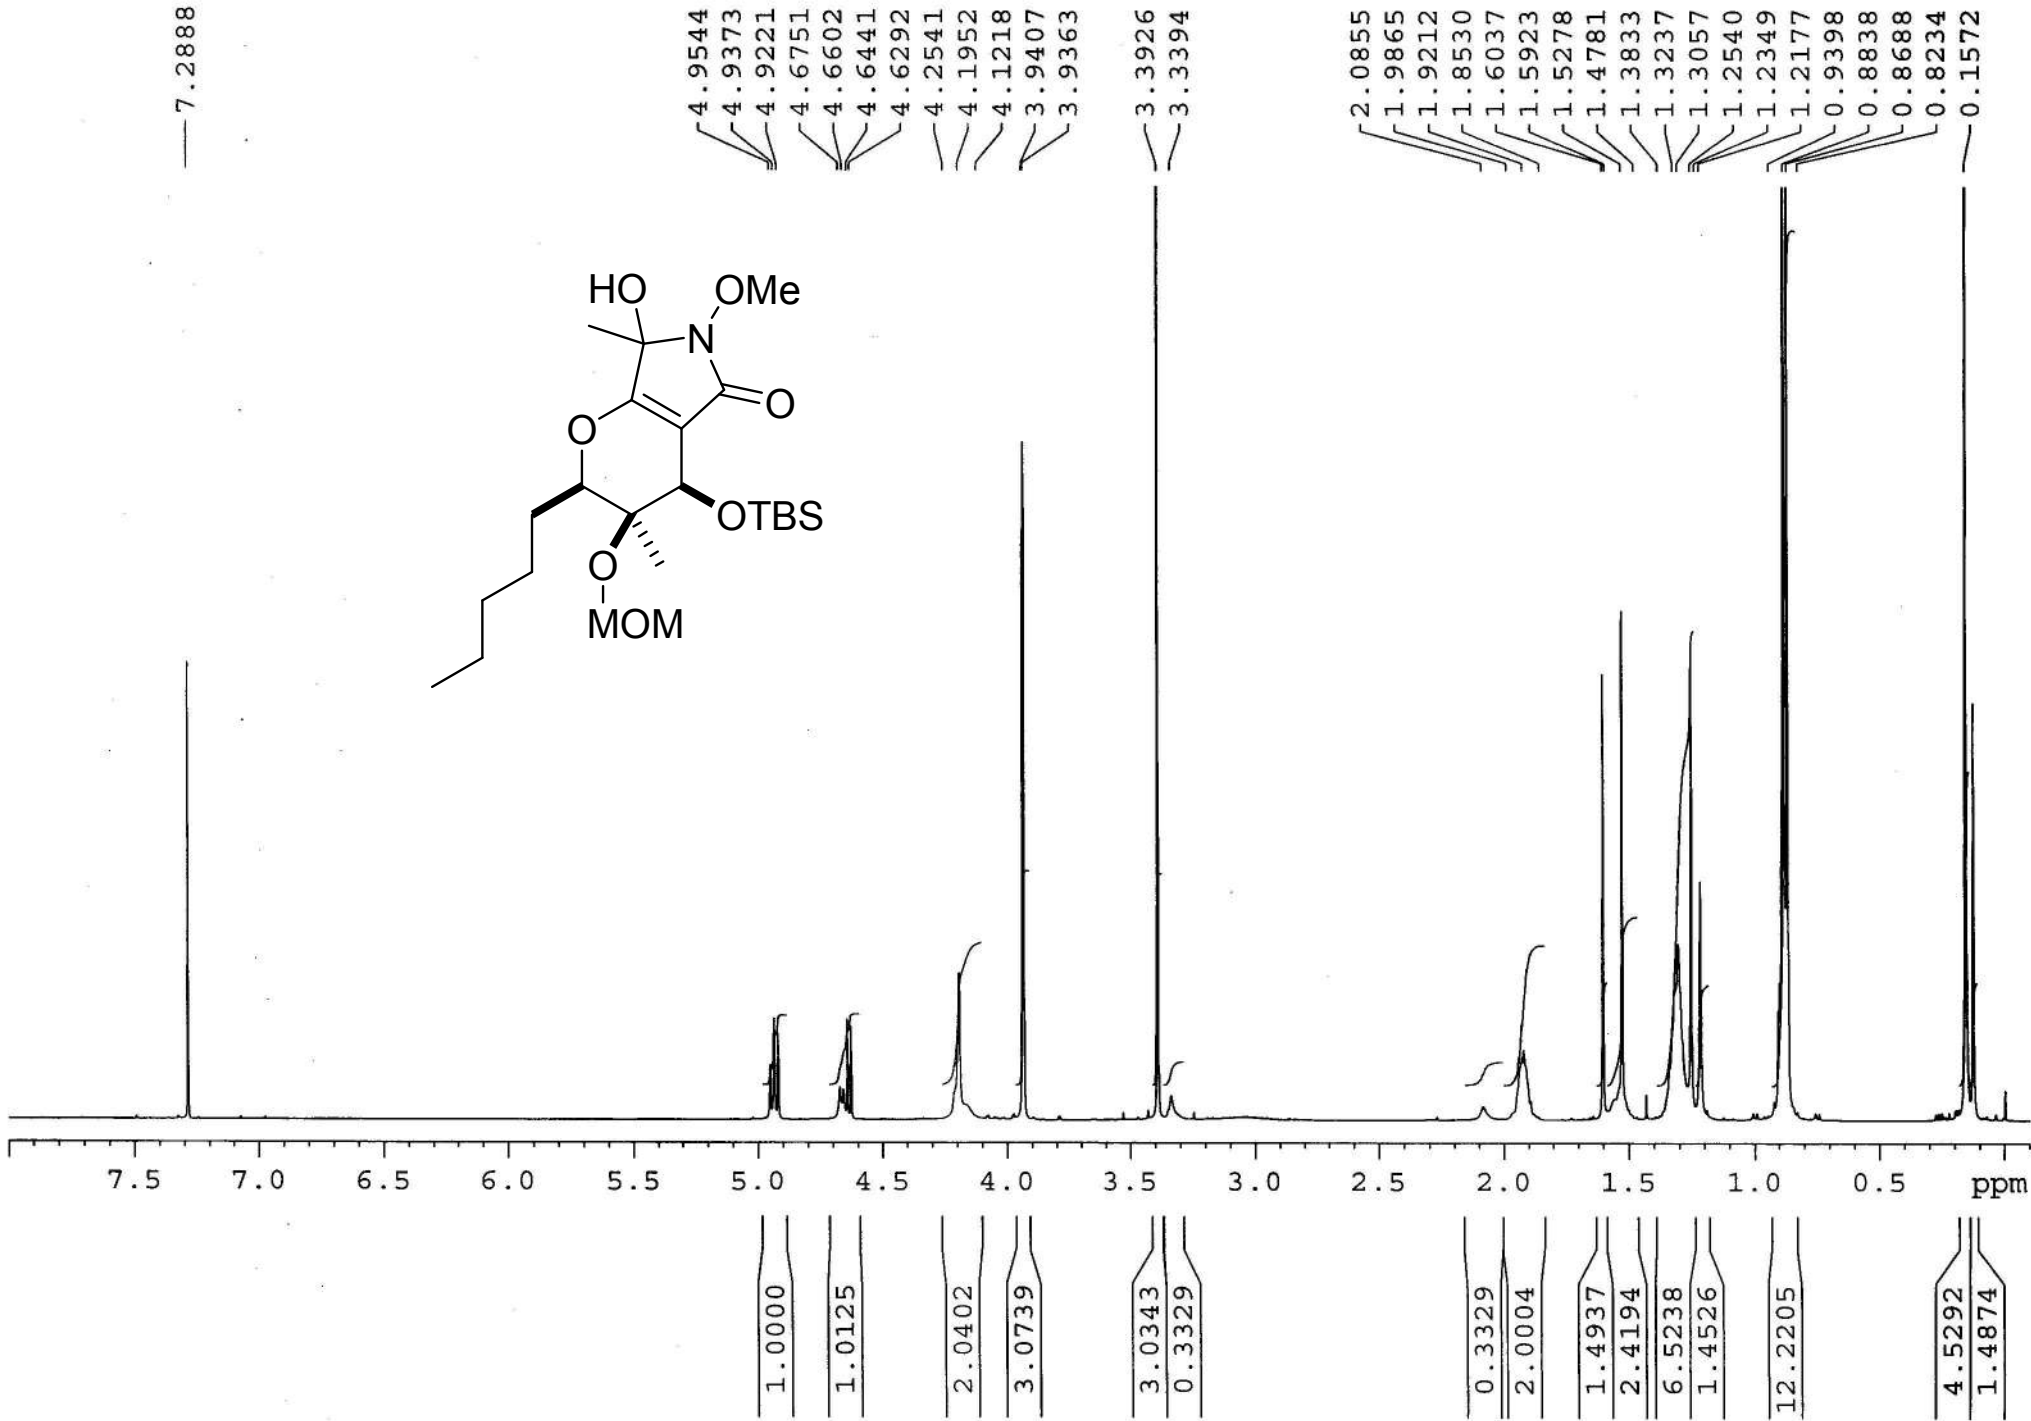

<sup>13</sup>C  
130-4-P411

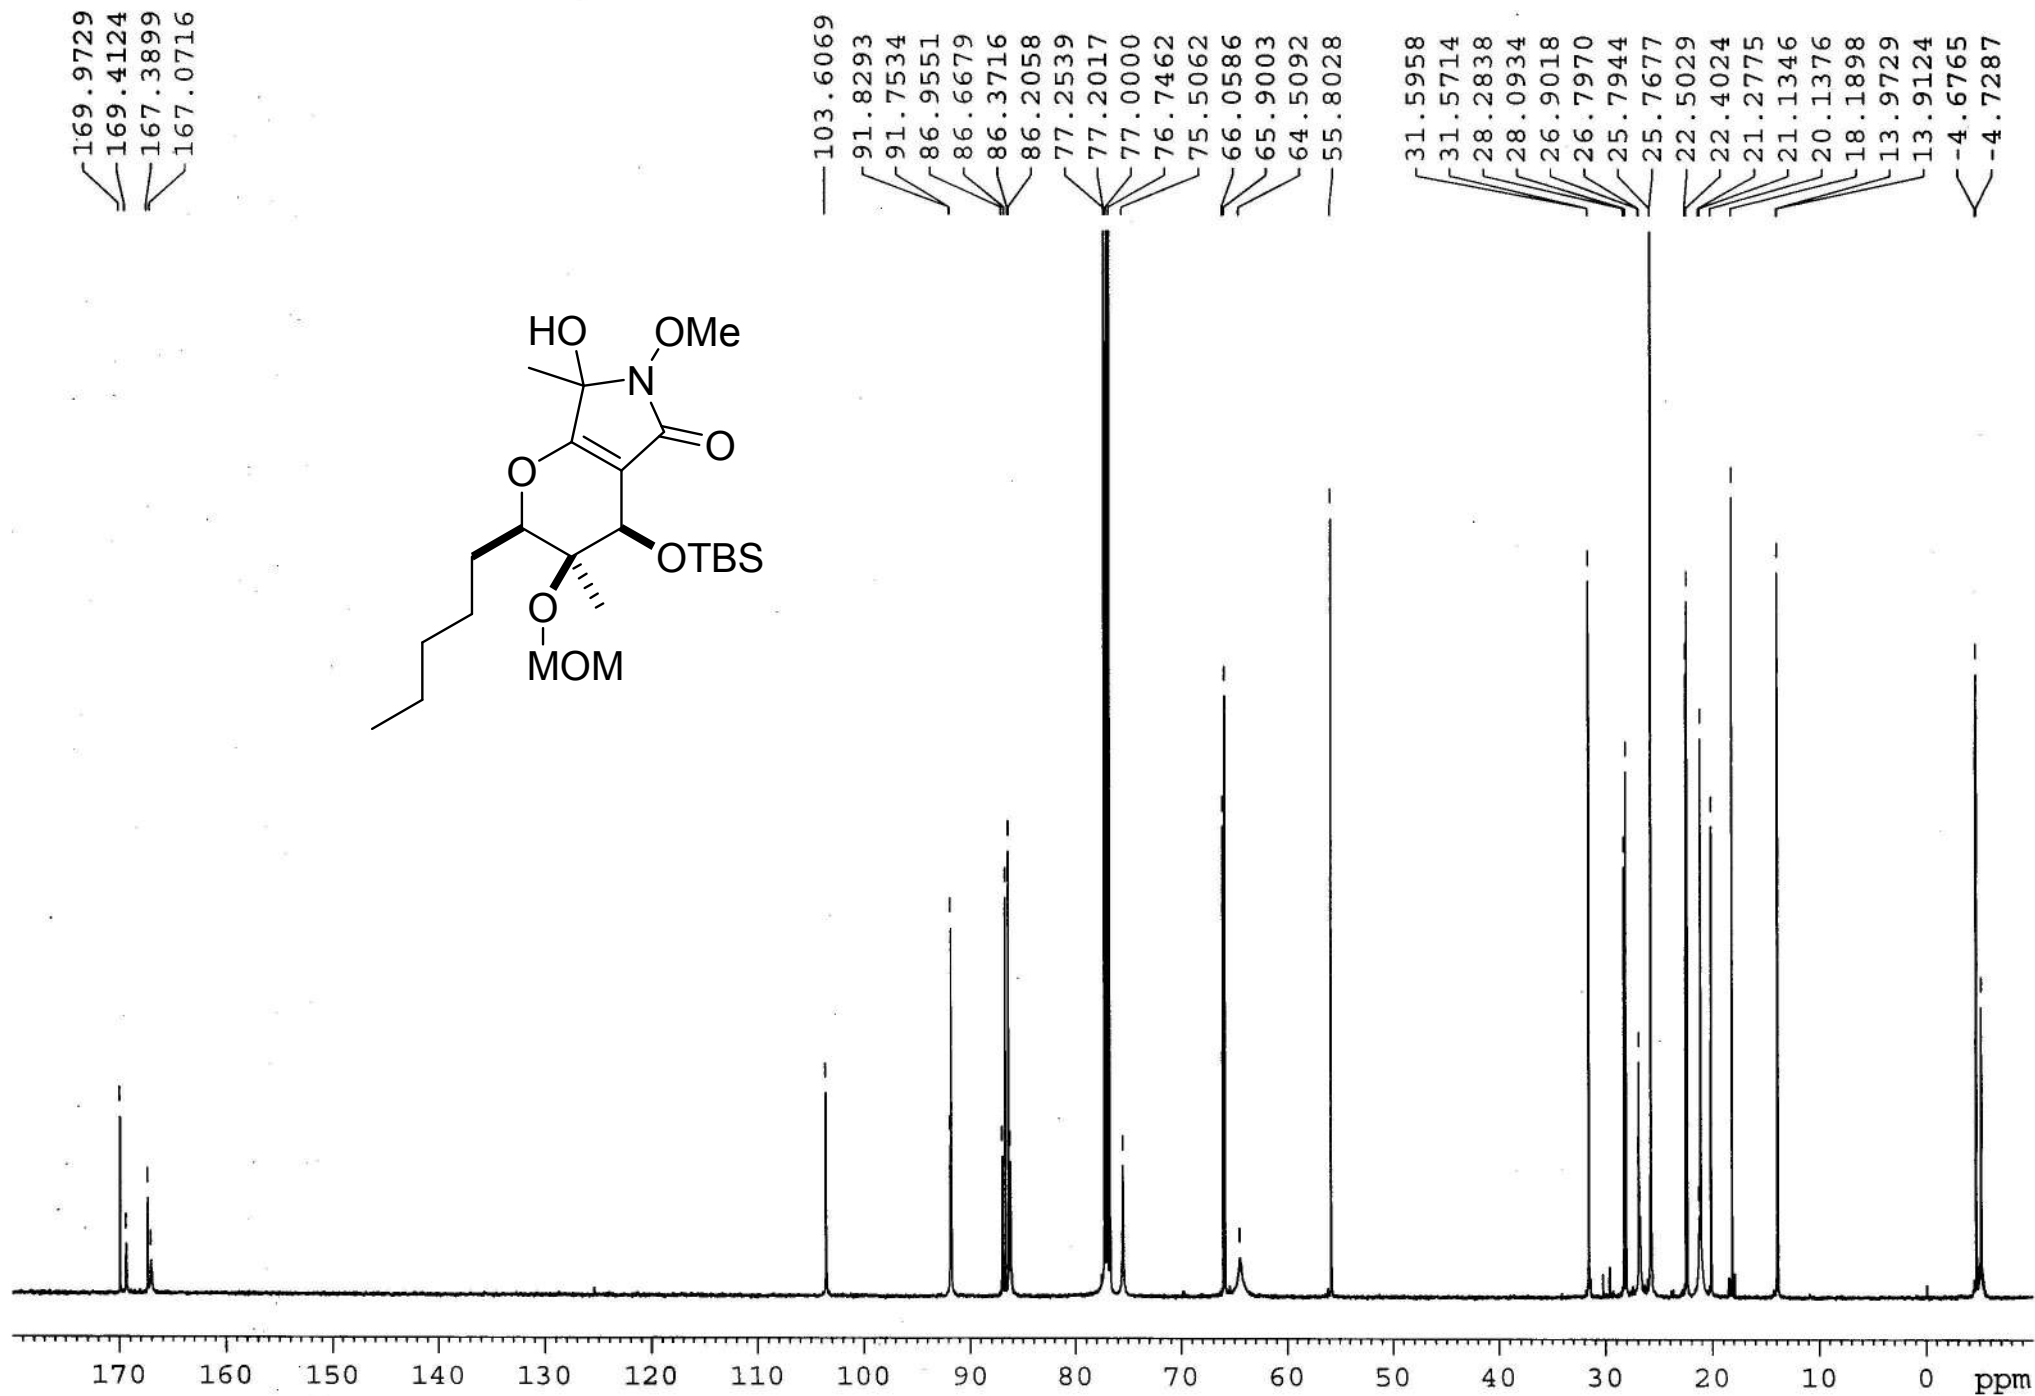

<sup>1</sup>H  
130-4-P410

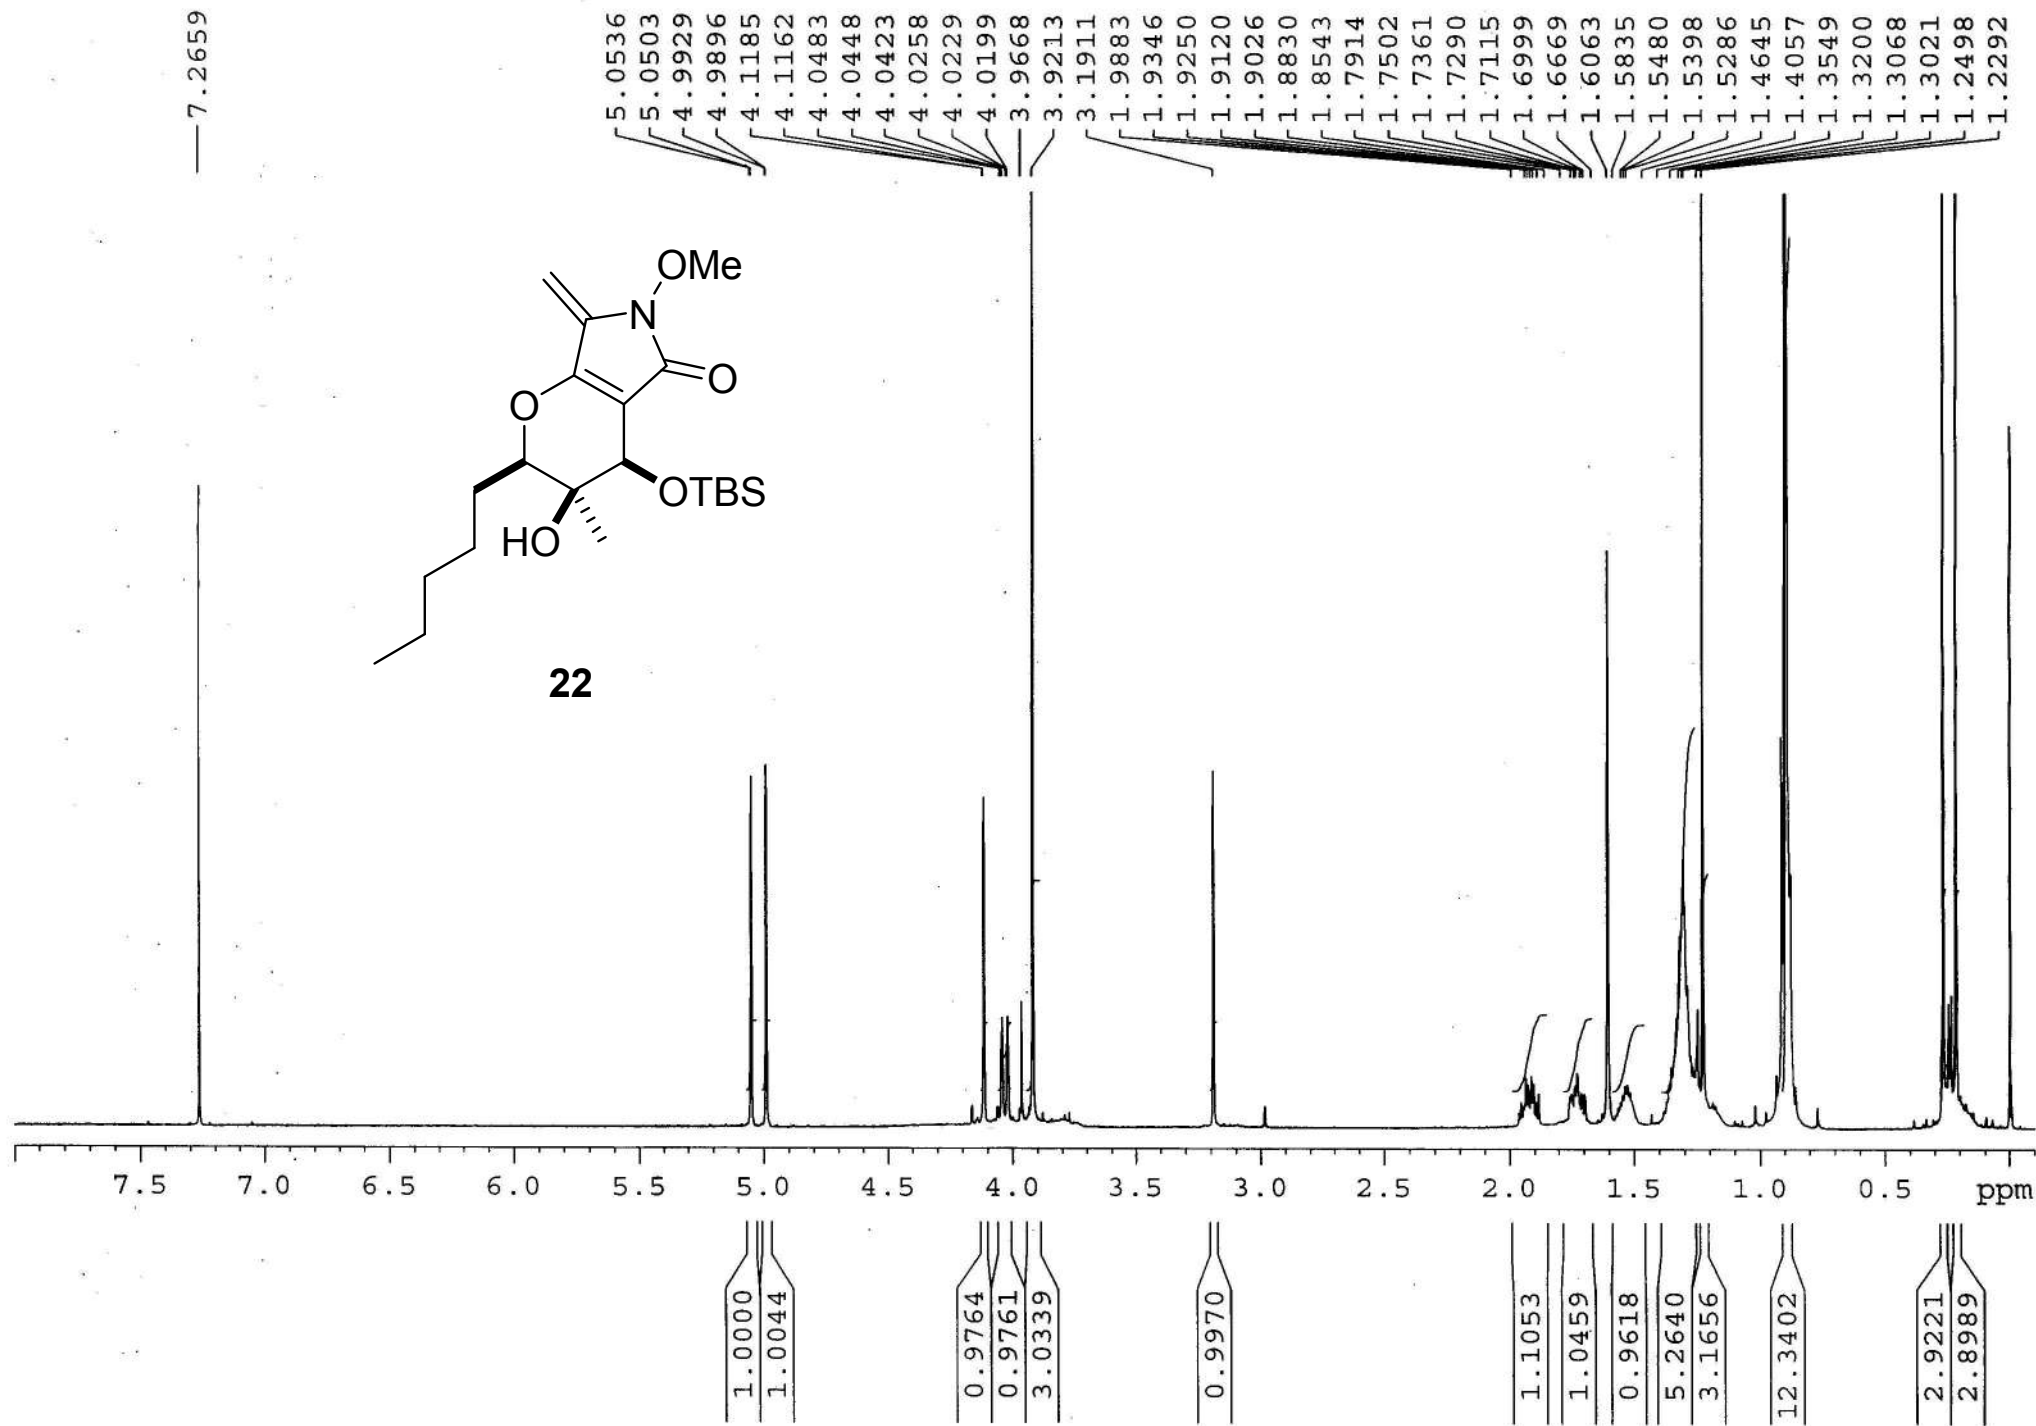

<sup>13</sup>C  
130-4-P410

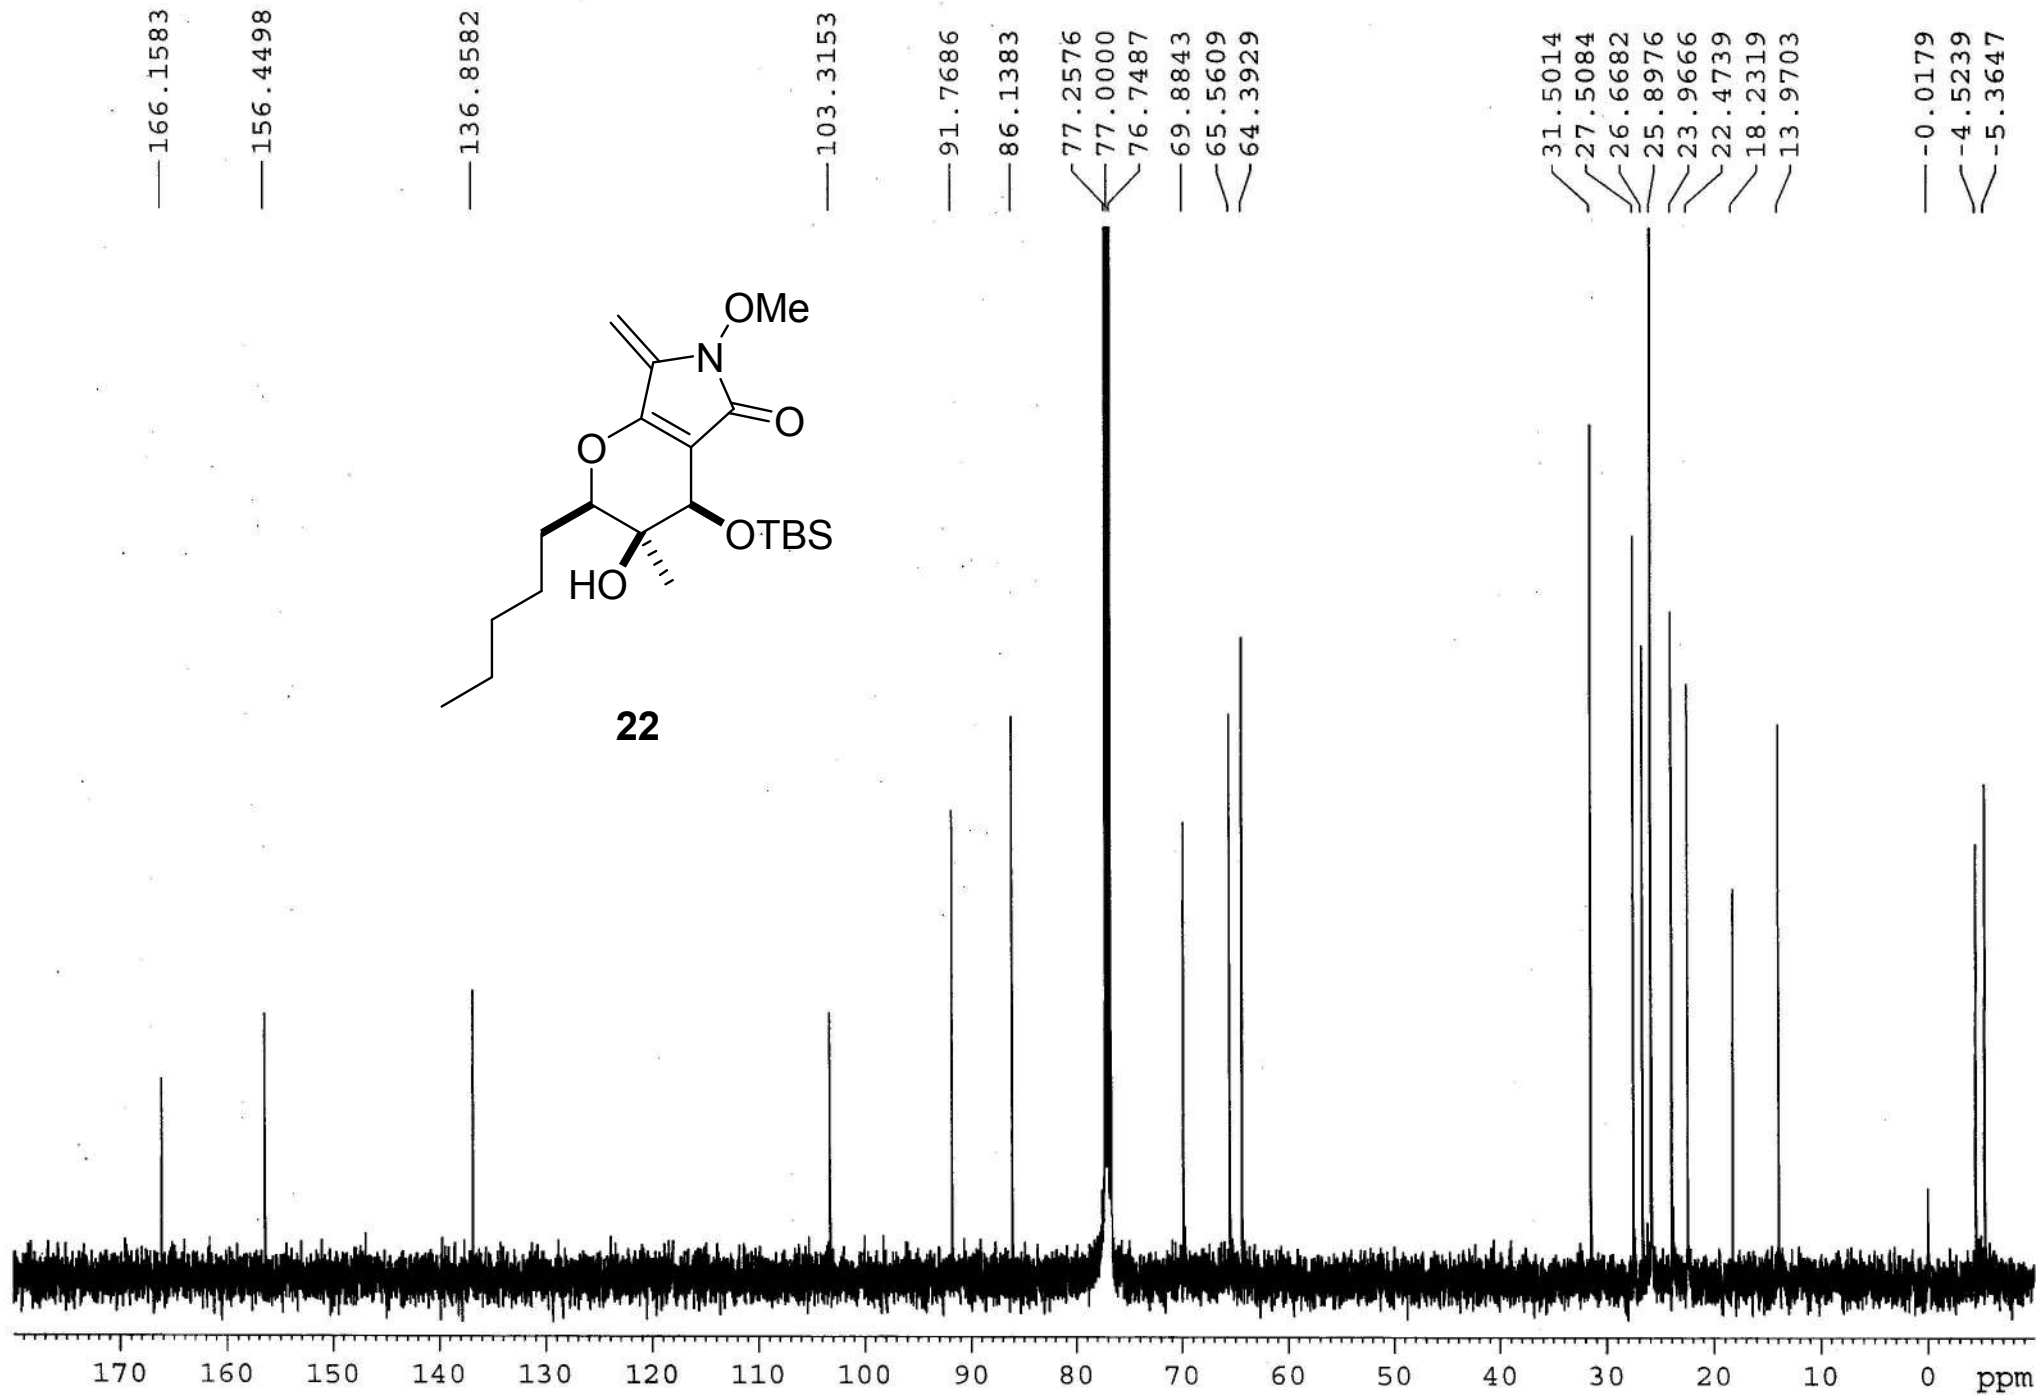

<sup>1</sup>H

130-4-P409

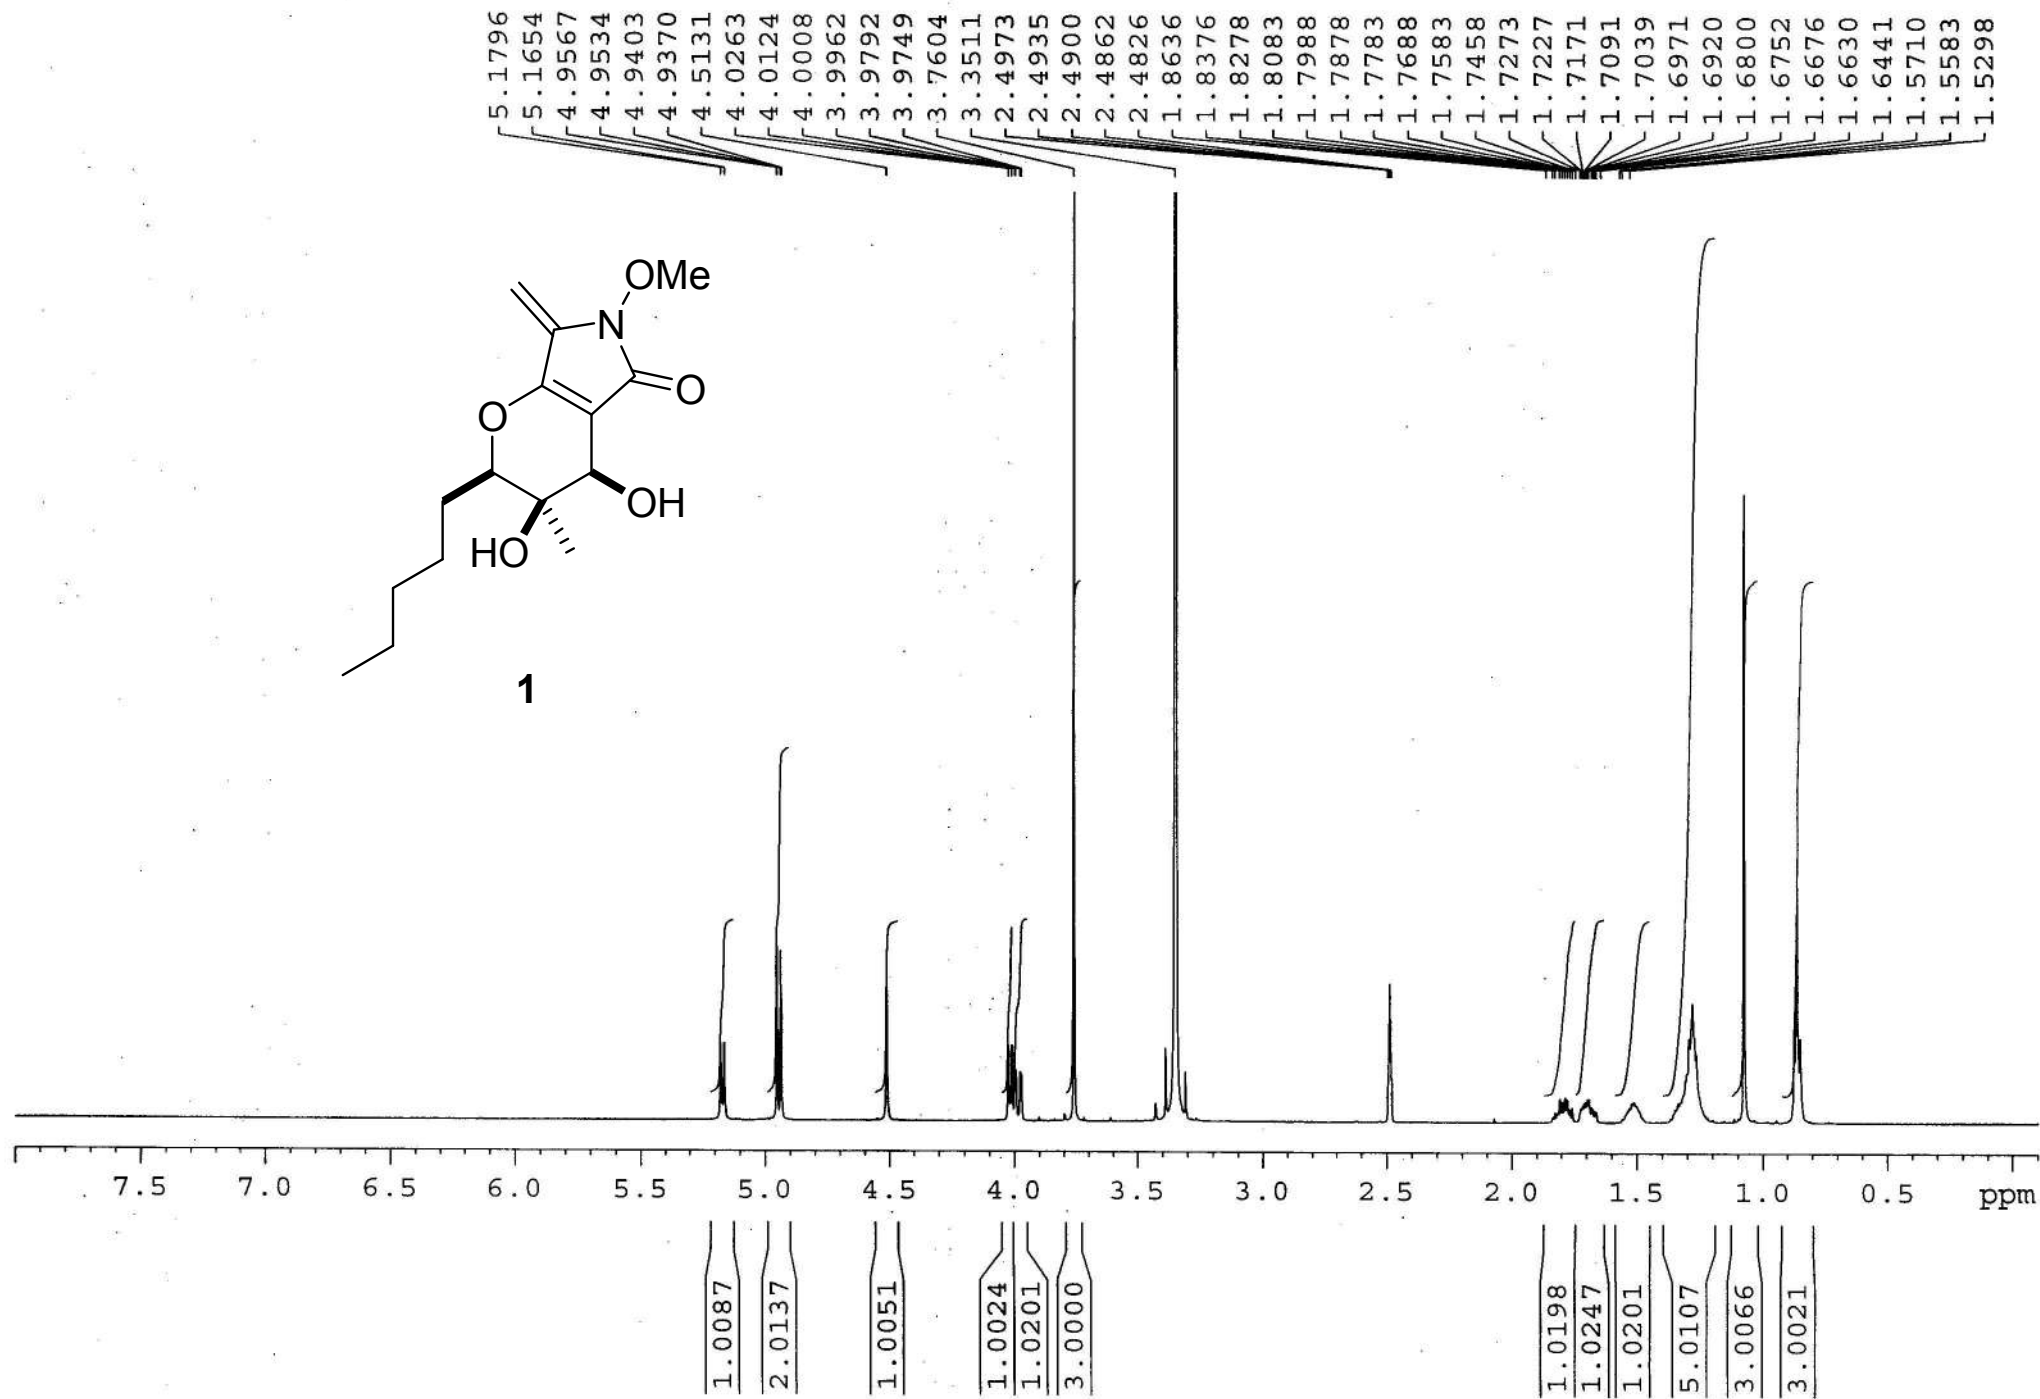

<sup>13</sup>C  
130-4-P409

— 165.9247

— 156.3475

— 136.6908

— 104.9459

— 90.8592

— 85.0220

— 68.7564

— 64.6692

— 63.6593

40.0034

39.8366

39.6698

39.5000

39.3360

39.1690

39.0021

31.0657

26.9759

25.2156

22.6323

21.9939

13.9021

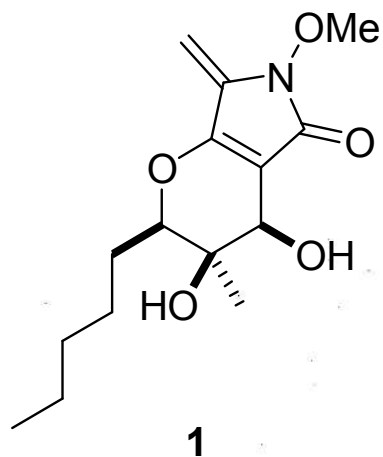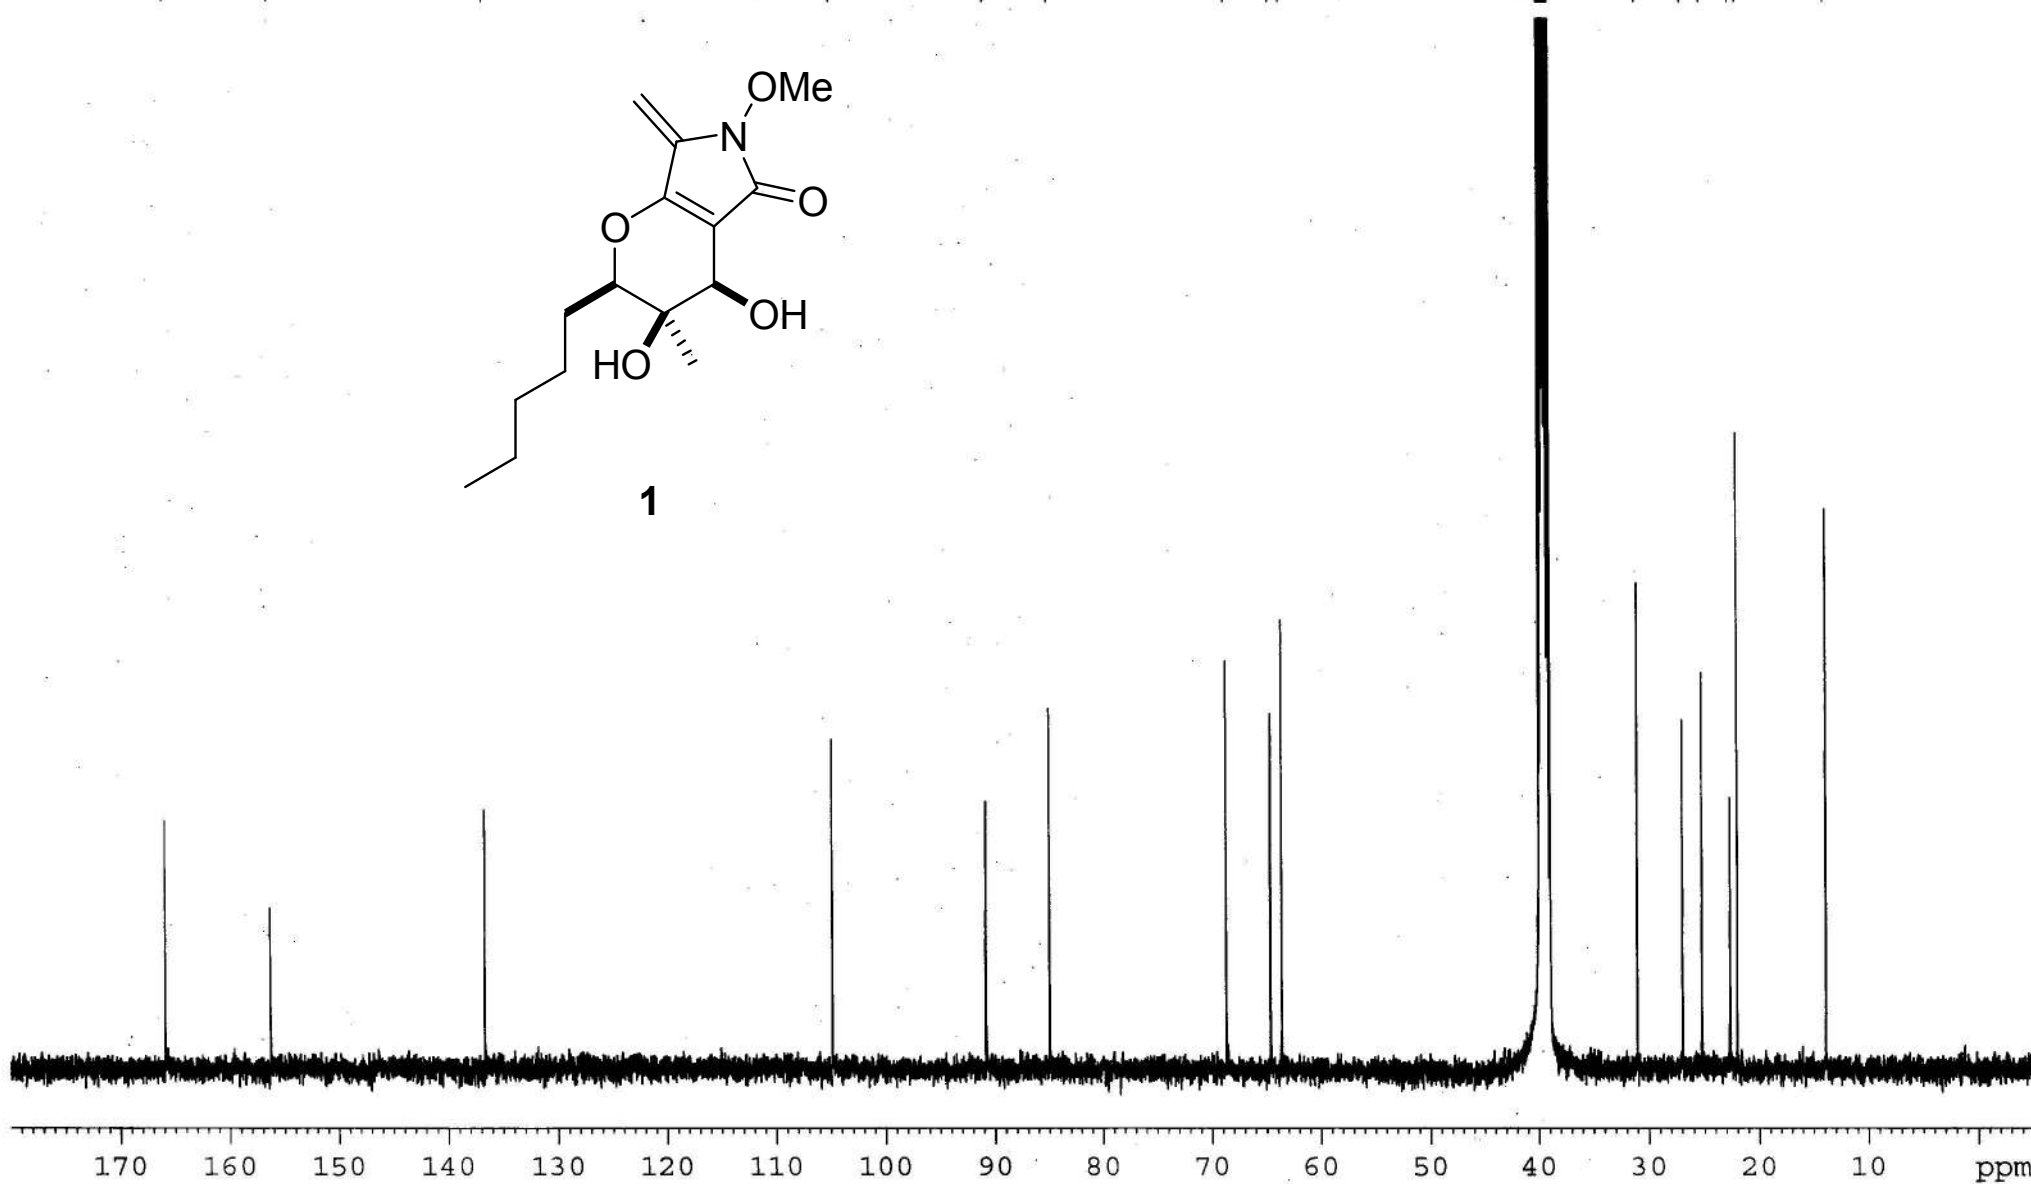

Supplement: c1ob05612c.pdf [file c1ob05612c.pdf]
